# Supplementary material for: Palladium-catalyzed highly selectivegem-difluoroallylation of propargyl sulfonates withgem-difluoroallylboron
Source: Royal Society of Chemistry journal article supplement (doi:10.1039/d2cc06613k), 2023-01-01
Supplement: d2cc06613k1.pdf [file d2cc06613k1.pdf]

*Supporting Information*

## **Palladium-Catalyzed Highly Selective *gem*-Difluoroallylation of Propargyl Sulfonates with *gem*-Difluoroallylboron**

Hao-Wen Li<sup>a</sup>, Yun-Cheng Luo<sup>b</sup>, Ling-Chao Yu<sup>a,c</sup>, Xingang Zhang<sup>\*, a,b</sup>

*<sup>a</sup>Green Catalysis Center, and College of Chemistry, Henan Institute of Advanced Technology, Zhengzhou University, Zhengzhou 450001, P. R. of China*

*<sup>b</sup>Key Laboratory of Organofluorine Chemistry, Shanghai Institute of Organic Chemistry, University of Chinese Academy of Sciences, Chinese Academy of Sciences, 345 Lingling Lu, Shanghai 200032, China. E-mail: [xgzhang@mail.sioc.ac.cn](mailto:xgzhang@mail.sioc.ac.cn)*

*<sup>c</sup>State Key Laboratory of Fluorinated Functional Membrane Materials, Zibo 256401, China*

## Table of Contents

|                                                                                                                                                                  |     |
|------------------------------------------------------------------------------------------------------------------------------------------------------------------|-----|
| 1. General Information and Materials.....                                                                                                                        | S3  |
| 2. Optimization of the Reaction Conditions.....                                                                                                                  | S4  |
| 3. Procedure for the Preparation of Propargyl Sulfonates <b>1</b> .....                                                                                          | S10 |
| 3.1 Synthesis of compounds <b>1a-1i</b> , <b>1n</b> , and <b>1p</b> .....                                                                                        | S11 |
| 3.2 Synthesis of compound <b>1j</b> .....                                                                                                                        | S15 |
| 3.3 Synthesis of esters <b>1k-1m</b> and <b>1q</b> .....                                                                                                         | S15 |
| 3.4 Synthesis of compound <b>1o</b> .....                                                                                                                        | S17 |
| 4. General Procedure for the Pd-Catalyzed <i>gem</i> -Difluoroallylation of Propargyl Sulfonates <b>1</b> and Characterization Data for Compounds <b>3</b> ..... | S18 |
| 5. Transformations of Compound <b>3o</b> .....                                                                                                                   | S26 |
| 6. References.....                                                                                                                                               | S28 |
| 7. Copies of <sup>1</sup> H NMR, <sup>19</sup> F NMR and <sup>13</sup> C NMR Spectra.....                                                                        | S29 |

## 1. General Information and Materials

**General Information:**  $^1\text{H}$  NMR and  $^{13}\text{C}$  NMR spectra were recorded on an Agilent MR 400 and Agilent MR 500 spectrometer.  $^{19}\text{F}$  NMR was recorded on an Agilent MR 400 spectrometer ( $\text{CFCl}_3$  as an external standard and low field is positive). Chemical shifts ( $\delta$ ) are reported in ppm, and coupling constants ( $J$ ) are in Hertz (Hz). The following abbreviations were used to explain the multiplicities: s = singlet, d = doublet, t = triplet, q = quartet, m = multiplet, and br = broad. NMR yield was determined by  $^{19}\text{F}$  NMR using fluorobenzene as an internal standard before working up the reaction. High-performance liquid chromatography was performed on Waters 2487-600E, Waters ACQUITY UPC2, and Agilent Series HPLC.

**Materials:** All reagents were used as received from commercial sources unless otherwise stated, or prepared as described in the literature. All solvents used in the reaction were anhydrous and purchased from J&K. KOH was purchased from Adamas and its purity is 99.999% metals basis.

## 2. Optimization of the Reaction Conditions

### Cu-catalyzed *gem*-difluoroallylation of propargyl sulfonate **1a**.<sup>a</sup>

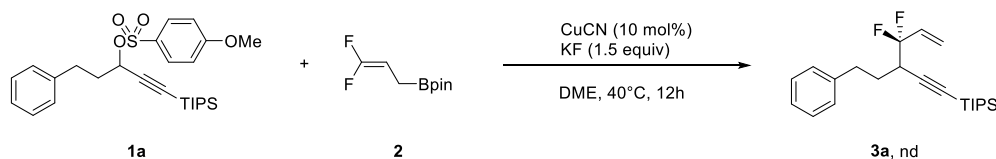

<sup>a</sup>Reaction conditions (unless otherwise specified): **1a** (0.2 mmol, 1.0 equiv), **2** (0.3 mmol, 1.5 equiv), DME (2 mL). <sup>b</sup>Determined by <sup>19</sup>F NMR using fluorobenzene as an internal standard. nd = not detected.

### Optimizations for the Pd-catalyzed *gem*-difluoroallylation of propargyl sulfonate (Tables S1-S6):

To a 25 mL of Schlenk tube were added Pd<sub>2</sub>(dba)<sub>3</sub> (2.5 mol %), base (2.0 equiv), and ligand (10 mol %). The mixture was evacuated and backfilled with argon three times. The solvent (2.0 mL) was added, and the solution was stirred for 5 minutes. Then, *gem*-difluoroallylboron **2** (1.5 equiv) was added, and the reaction mixture was stirred for 5 minutes. Secondary propargyl sulfonate **1a** (0.2 mmol, 1.0 equiv) was added slowly. The Schlenk tube was screw-capped. After stirring for 1 h at room temperature, the resulting mixture was filtered with a pad of celite. The yield was determined by <sup>19</sup>F NMR using fluorobenzene as an internal standard.

**Table S1. Effect of the leaving groups on the reaction.**<sup>a</sup>

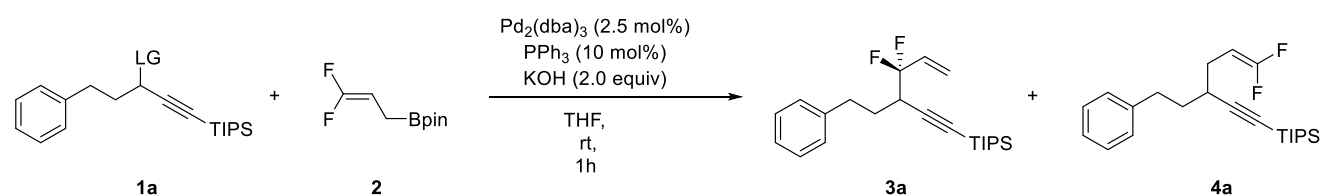

| Entry | <b>1</b> , LG                                  | <b>3a/4a</b> , yield (%) <sup>b</sup> | γ/α  |
|-------|------------------------------------------------|---------------------------------------|------|
| 1     | <b>1ab</b> , OAc                               | nd                                    | -    |
| 2     | <b>1ac</b> , <sup>t</sup> BuCO <sub>2</sub>    | nd                                    | -    |
| 3     | <b>1ad</b> , PhCO <sub>2</sub>                 | nd                                    | -    |
| 4     | <b>1ae</b> , <i>p</i> -MeO-PhCO <sub>2</sub>   | nd                                    | -    |
| 5     | <b>1af</b> , <i>p</i> -MeO-PhSO <sub>2</sub> O | 66/6                                  | 11:1 |

<sup>a</sup>Reaction conditions (unless otherwise specified): **1a** (0.2 mmol, 1.0 equiv), **2** (0.3 mmol, 1.5 equiv), THF (2 mL). <sup>b</sup>Determined by <sup>19</sup>F NMR using fluorobenzene as an internal standard. nd = not detected.

**Table S2. Effect of the bases on the reaction.<sup>a</sup>**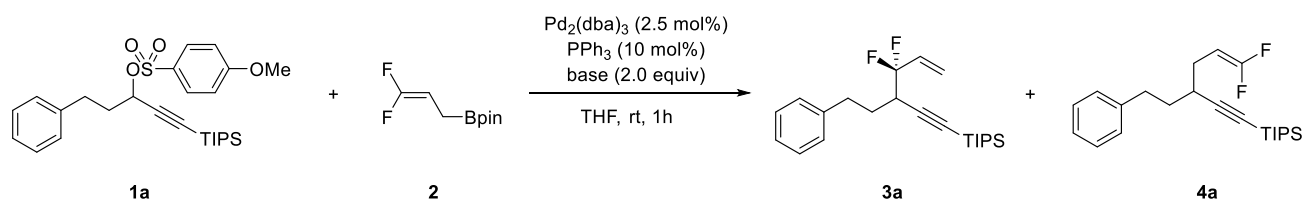

| Entry | Base                     | <b>3a/4a</b> , yield (%) <sup>b</sup> | $\gamma/\alpha$ |
|-------|--------------------------|---------------------------------------|-----------------|
| 1     | KOH                      | 66/6                                  | 11:1            |
| 2     | NaOH                     | 48/2                                  | 24:1            |
| 3     | $\text{K}_2\text{CO}_3$  | nd                                    | -               |
| 4     | $\text{Cs}_2\text{CO}_3$ | nd                                    | -               |
| 5     | $\text{K}_3\text{PO}_4$  | nd                                    | -               |
| 6     | KF                       | nd                                    | -               |
| 7     | LiF                      | nd                                    | -               |
| 8     | LiOMe                    | nd                                    | -               |
| 9     | $\text{LiO}^t\text{Bu}$  | 18/2                                  | 9:1             |

<sup>a</sup>Reaction conditions (unless otherwise specified): **1a** (0.2 mmol, 1.0 equiv), **2** (0.3 mmol, 1.5 equiv), THF (2 mL). <sup>b</sup>Determined by  $^{19}\text{F}$  NMR using fluorobenzene as an internal standard. nd = not detected.

**Table S3. Effect of the ligands on the reaction.<sup>a</sup>**

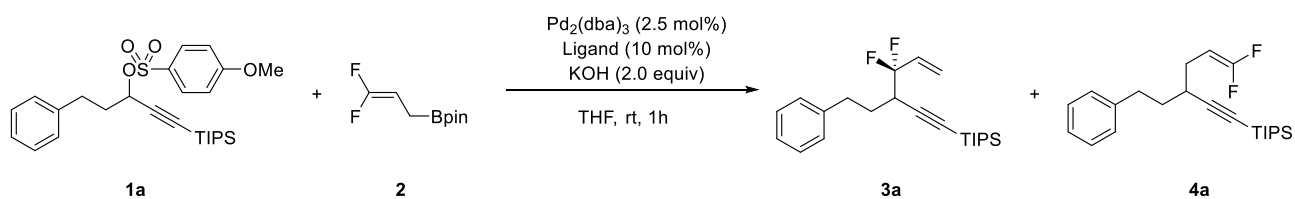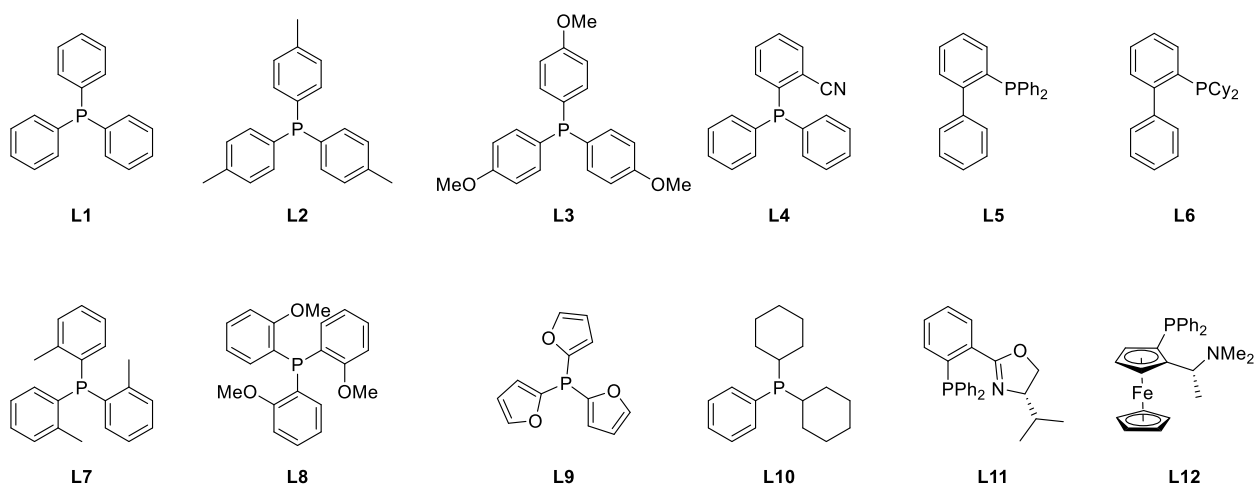

| Entry | Ligand     | <b>3a/4a</b> , yield (%) <sup>b</sup> | $\gamma/\alpha$ |
|-------|------------|---------------------------------------|-----------------|
| 1     | <b>L1</b>  | 66/6                                  | 11:1            |
| 2     | <b>L2</b>  | 62/8                                  | 7.7:1           |
| 3     | <b>L3</b>  | 62/16                                 | 3.8:1           |
| 4     | <b>L4</b>  | 80/4                                  | 20:1            |
| 5     | <b>L5</b>  | 9/2                                   | 4.5:1           |
| 6     | <b>L6</b>  | nd                                    | -               |
| 7     | <b>L7</b>  | nd                                    | -               |
| 8     | <b>L8</b>  | 10/8                                  | 1.2:1           |
| 9     | <b>L9</b>  | 56/8                                  | 7:1             |
| 10    | <b>L10</b> | 2/0                                   | -               |
| 11    | <b>L11</b> | nd                                    | -               |
| 12    | <b>L12</b> | nd                                    | -               |

<sup>a</sup>Reaction conditions (unless otherwise specified): **1a** (0.2 mmol, 1.0 equiv), **2** (0.3 mmol, 1.5 equiv), THF (2 mL). <sup>b</sup>Determined by <sup>19</sup>F NMR using fluorobenzene as an internal standard. nd = not detected.

**Table S4. Effect of the loading amount of the Pd-catalyst on the reaction.<sup>a</sup>**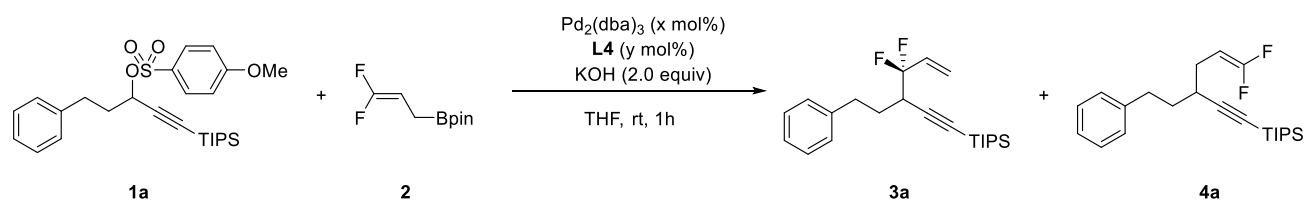

| Entry | $\text{Pd}_2(\text{dba})_3$ (x mol%) | $\text{L4}$ (y mol%) | <b>3a/4a</b> , yield (%) <sup>b</sup> | $\gamma/\alpha$ |
|-------|--------------------------------------|----------------------|---------------------------------------|-----------------|
| 1     | 0.5                                  | 2                    | nd                                    | -               |
| 2     | 0.75                                 | 3                    | 42/6                                  | 7:1             |
| 3     | 1                                    | 4                    | 48/6                                  | 8:1             |
| 4     | 1.25                                 | 5                    | 58/4                                  | 14.5:1          |
| 5     | 2.5                                  | 10                   | 80/4                                  | 20:1            |
| 6     | 5                                    | 20                   | 80/4                                  | 20:1            |

<sup>a</sup>Reaction conditions (unless otherwise specified): **1a** (0.2 mmol, 1.0 equiv), **2** (0.3 mmol, 1.5 equiv), THF (2 mL). <sup>b</sup>Determined by <sup>19</sup>F NMR using fluorobenzene as an internal standard. nd = not detected.

**Table S5. Effect of the solvents on the reaction.<sup>a</sup>**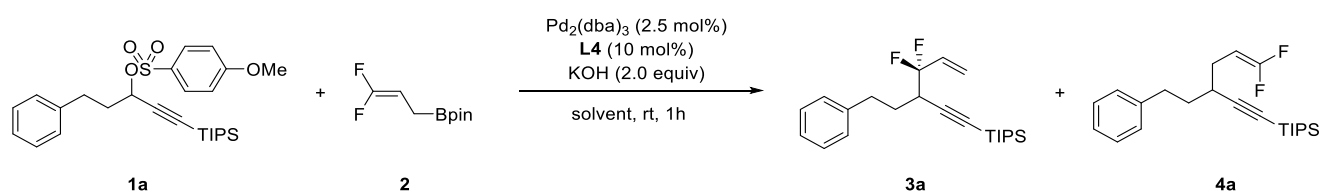

| Entry | Solvent | <b>3a/4a</b> , yield (%) <sup>b</sup> | $\gamma/\alpha$ |
|-------|---------|---------------------------------------|-----------------|
| 1     | THF     | 80/4                                  | 20:1            |
| 2     | Dioxane | 92/4                                  | 23:1            |
| 3     | DME     | 92/12                                 | 7.7:1           |
| 4     | MeOH    | nd                                    | -               |
| 5     | MeCN    | 22/6                                  | 3.7:1           |
| 6     | DMF     | 4/0                                   | -               |
| 7     | DMSO    | 6/2                                   | 3:1             |
| 8     | DCM     | 20/6                                  | 3.3:1           |
| 9     | 2-MeTHF | 66/6                                  | 11:1            |
| 10    | CPME    | 66/14                                 | 4.7:1           |

<sup>a</sup>Reaction conditions (unless otherwise specified): **1a** (0.2 mmol, 1.0 equiv), **2** (0.3 mmol, 1.5 equiv), solvent (2 mL). <sup>b</sup>Determined by <sup>19</sup>F NMR using fluorobenzene as an internal standard. nd = not detected.

**Table S6. Effect of the reaction temperature on the reaction.<sup>a</sup>**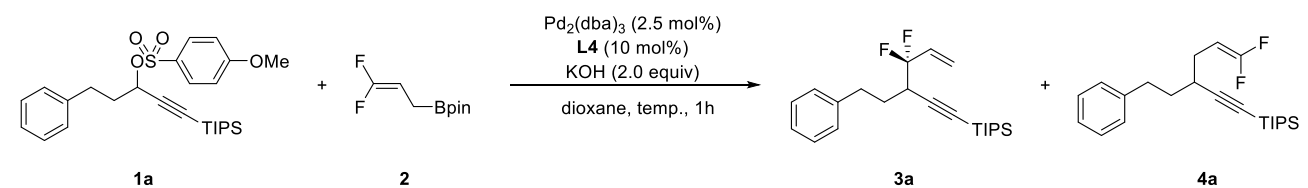

| Entry | Temp (°C) | <b>3a/4a</b> , yield (%) <sup>b</sup> | $\gamma/\alpha$ |
|-------|-----------|---------------------------------------|-----------------|
| 1     | rt        | 92/4                                  | 23:1            |
| 2     | 0         | 20/2                                  | 10:1            |
| 3     | 40        | 48/4                                  | 12:1            |

<sup>a</sup>Reaction conditions (unless otherwise specified): **1a** (0.2 mmol, 1.0 equiv), **2** (0.3 mmol, 1.5 equiv), dioxane (2 mL). <sup>b</sup>Determined by <sup>19</sup>F NMR using fluorobenzene as an internal standard. nd = not detected.



**Table S7. Control experiments.<sup>a</sup>**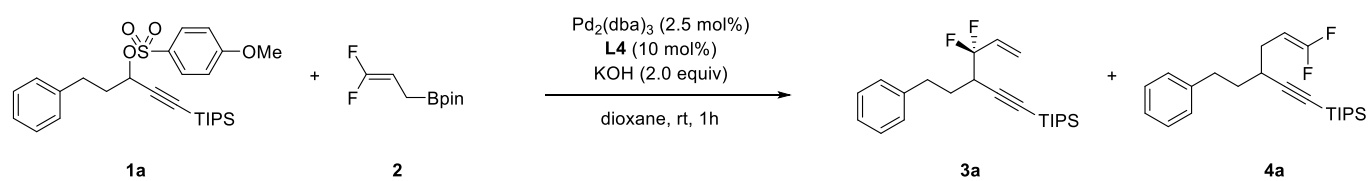

| Entry | Conditions                              | <b>3a/4a</b> , yield (%) <sup>b</sup> | $\gamma/\alpha$ |
|-------|-----------------------------------------|---------------------------------------|-----------------|
| 1     | ---                                     | 92(90)/4                              | 23:1            |
| 2     | No Pd catalyst                          | nd                                    | -               |
| 3     | No ligand                               | nd                                    | -               |
| 4     | No KOH                                  | nd                                    | -               |
| 5     | aerobic condition                       | 18/4                                  | 4.5:1           |
| 6     | H <sub>2</sub> O (0.56 equiv) was added | 72/6                                  | 12:1            |
| 7     | H <sub>2</sub> O (0.83 equiv) was added | 72/6                                  | 12:1            |
| 8     | H <sub>2</sub> O (1.11 equiv) was added | 72/6                                  | 12:1            |
| 9     | H <sub>2</sub> O (1.39 equiv) was added | 74/6                                  | 12.3:1          |

<sup>a</sup>Reaction conditions (unless otherwise specified): **1a** (0.2 mmol, 1.0 equiv), **2** (0.3 mmol, 1.5 equiv), dioxane (2 mL). <sup>b</sup>Determined by <sup>19</sup>F NMR using fluorobenzene as an internal standard, and the number in parenthesis is the isolated yield. nd = not detected.

### 3. Procedure for the Preparation of Propargyl Sulfonates 1

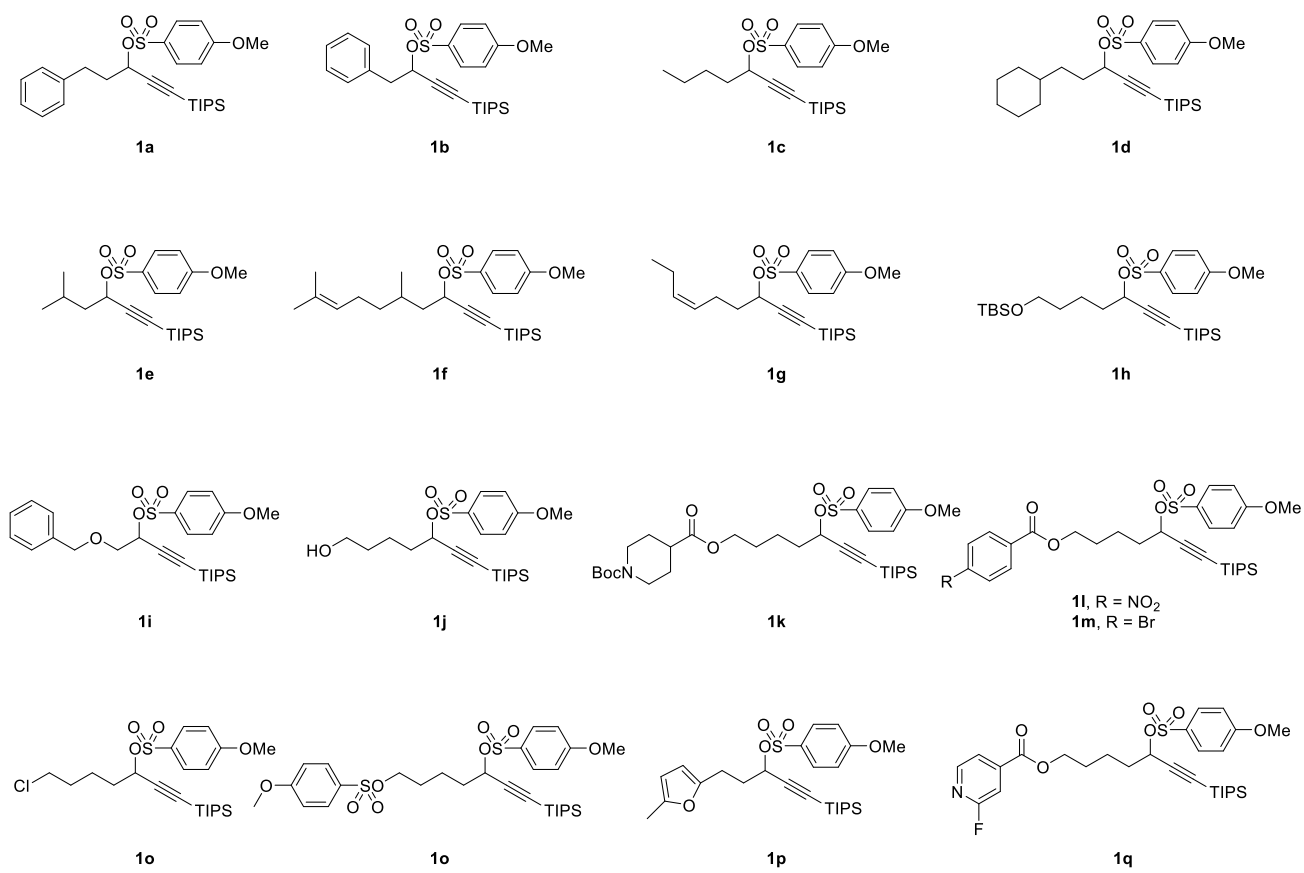

Structure of Propargyl Sulfonates 1

### 3.1 Synthesis of compounds 1a-1i, 1n, and 1p

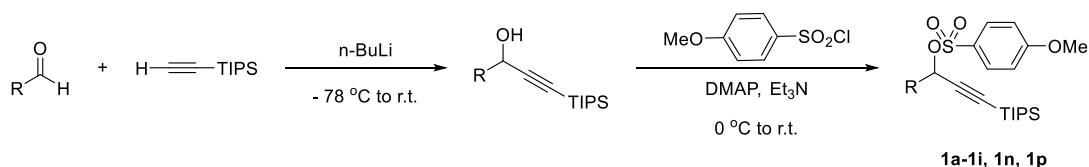

**General procedure for the preparation of secondary propargyl sulfonates 1.** To a solution of triisopropyl acetylene (1.4 mL, 6.25 mmol, 1.25 equiv) in THF (20 mL) was added dropwise *n*-butyllithium (2.6 mL, 2.5 M in hexane, 6.5 mmol, 1.3 equiv) at -78 °C under Ar. The reaction was stirred at -78 °C for 0.5 h and room temperature for another 1 h. Then the mixture was cooled to -78 °C, and aldehyde (0.66 mL, 5 mmol, 1.0 equiv, in 20 mL THF) was added slowly. After stirring at room temperature for 1 h, the reaction was quenched by saturated NH<sub>4</sub>Cl solution, extracted with ethyl acetate (30 mL × 2), and concentrated to afford the secondary propargyl alcohol. To a solution of the alcohol in dry DCM (5 mL) were added DMAP (30.5 mg, 0.25 mmol, 0.05 equiv) and triethylamine (0.83 mL, 6 mmol, 1.2 equiv). Then, 4-methoxybenzenesulfonyl chloride (1.10 g, 5.5 mmol, 1.1 equiv) was slowly added at 0 °C. After stirring at room temperature overnight, the reaction was quenched by saturated NH<sub>4</sub>Cl solution, extracted with DCM (30 mL × 2), and concentrated to afford the crude product. The residue was purified by flash column chromatography to give product **1a**.

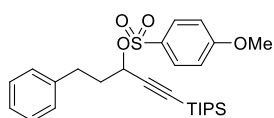

#### 5-Phenyl-1-(triisopropylsilyl)pent-1-yn-3-yl 4-methoxybenzenesulfonate

**(1a).** The compound **1a** was obtained in 88% yield (2.14 g) as a colorless oil after flash column chromatography (hexane/EtOAc = 40:1). <sup>1</sup>H NMR (500

MHz, CDCl<sub>3</sub>) δ 7.87 (d, *J* = 9.0 Hz, 2H), 7.30 (t, *J* = 7.4 Hz, 2H), 7.24 - 7.17 (m, 3H), 6.97 (d, *J* = 9.0 Hz, 2H), 5.11 (t, *J* = 6.4 Hz, 1H), 3.87 (s, 3H), 2.88 - 2.77 (m, 2H), 2.23 - 2.11 (m, 2H), 1.05 - 0.96 (m, 21H). <sup>13</sup>C NMR (126 MHz, CDCl<sub>3</sub>) δ 163.6, 140.3, 130.1, 128.5, 128.4, 128.3, 126.2, 114.2, 101.8, 90.2, 71.3, 55.5, 38.0, 30.9, 18.4, 10.9. MS (DART): *m/z* (%) 504 [M+NH<sub>4</sub>]<sup>+</sup>. HRMS (DART): [M+NH<sub>4</sub>]<sup>+</sup> Calculated for C<sub>27</sub>H<sub>42</sub>O<sub>4</sub>NSSi: 504.2598; Found: 504.2597.

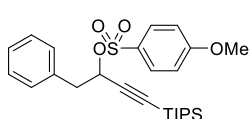

#### 1-Phenyl-4-(triisopropylsilyl)but-3-yn-2-yl 4-methoxybenzenesulfonate (1b).

The product was obtained in 81% yield (1.92 g) as a colorless oil after flash column chromatography (hexane/EtOAc = 40:1). <sup>1</sup>H NMR (400 MHz, CDCl<sub>3</sub>) δ

7.78 (d, *J* = 8.8 Hz, 2H), 7.31 - 7.26 (m, 1H), 7.25 - 7.21 (m, 4H), 6.91 (d, *J* = 8.8 Hz, 2H), 5.22 (dd,

$J = 7.4, 6.3$  Hz, 1H), 3.85 (s, 3H), 3.22 - 3.07 (m, 2H), 0.96 - 0.91 (m, 21H).  $^{13}\text{C}$  NMR (101 MHz,  $\text{CDCl}_3$ )  $\delta$  163.6, 134.7, 130.0, 129.8, 128.4, 128.3, 127.1, 114.2, 101.6, 90.8, 72.2, 55.5, 42.6, 18.4, 10.9. MS (DART):  $m/z$  (%) 490  $[\text{M}+\text{NH}_4]^+$ . HRMS (DART):  $[\text{M}+\text{NH}_4]^+$  Calculated for  $\text{C}_{26}\text{H}_{40}\text{O}_4\text{NSSi}$ : 490.2442; Found: 490.2441.

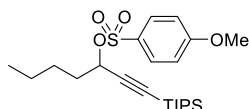

**1-(Triisopropylsilyl)hept-1-yn-3-yl 4-methoxybenzenesulfonate (1c).** The product was obtained in 87% yield (1.91 g) as a colorless oil after flash column chromatography (hexane/EtOAc = 40:1).

$^1\text{H}$  NMR (400 MHz,  $\text{CDCl}_3$ )  $\delta$  7.86 (d,  $J = 8.8$  Hz, 2H), 6.96 (d,  $J = 8.8$  Hz, 2H), 5.07 (t,  $J = 6.4$  Hz, 1H), 3.85 (s, 3H), 1.89 - 1.79 (m, 2H), 1.48 - 1.42 (m, 2H), 1.37 - 1.31 (m, 2H), 0.99 - 0.92 (m, 21H), 0.98 (t,  $J = 7.4$  Hz, 3H).  $^{13}\text{C}$  NMR (101 MHz,  $\text{CDCl}_3$ )  $\delta$  163.6, 130.1, 128.7, 114.2, 102.3, 89.7, 72.1, 55.5, 36.0, 26.8, 22.0, 18.4, 13.8, 11.0. MS (DART):  $m/z$  (%) 456  $[\text{M}+\text{NH}_4]^+$ . HRMS (DART):  $[\text{M}+\text{NH}_4]^+$  Calculated for  $\text{C}_{23}\text{H}_{42}\text{O}_4\text{NSSi}$ : 456.2598; Found: 456.2599.

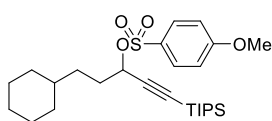

**5-Cyclohexyl-1-(triisopropylsilyl)pent-1-yn-3-yl 4-methoxybenzenesulfonate (1d).** The product was obtained in 34% yield (0.82 g) as a colorless oil after flash column chromatography (hexane/EtOAc = 40:1).

$^1\text{H}$  NMR (400 MHz,  $\text{CDCl}_3$ )  $\delta$  7.85 (d,  $J = 8.8$  Hz, 2H), 6.96 (d,  $J = 8.8$  Hz, 2H), 5.05 (t,  $J = 6.4$  Hz, 1H), 3.85 (s, 3H), 1.89 - 1.81 (m, 2H), 1.70 - 1.61 (m, 5H), 1.37 - 1.31 (m, 2H), 1.26 - 1.14 (m, 4H), 0.99 - 0.91 (m, 21H), 0.89 - 0.82 (m, 2H).  $^{13}\text{C}$  NMR (101 MHz,  $\text{CDCl}_3$ )  $\delta$  163.6, 130.1, 128.7, 114.2, 102.3, 89.7, 72.1, 55.5, 37.0, 33.8, 33.2, 33.1, 32.2, 26.5, 26.2, 18.4, 10.9. MS (DART):  $m/z$  (%) 510  $[\text{M}+\text{NH}_4]^+$ . HRMS (DART):  $[\text{M}+\text{NH}_4]^+$  Calculated for  $\text{C}_{27}\text{H}_{48}\text{O}_4\text{NSSi}$ : 510.3068; Found: 510.3065.

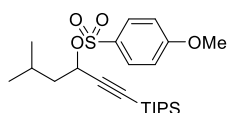

**5-Methyl-1-(triisopropylsilyl)hex-1-yn-3-yl 4-methoxybenzenesulfonate (1e).**

The product was obtained in 99% yield (2.52 g) as a colorless oil after flash column chromatography (hexane/EtOAc = 40:1).  $^1\text{H}$  NMR (400 MHz,  $\text{CDCl}_3$ )  $\delta$  7.86 (d,  $J = 8.8$  Hz, 2H), 6.96 (d,  $J = 8.8$  Hz, 2H), 5.12 (t,  $J = 7.0$  Hz, 1H), 3.86 (s, 3H), 1.92 - 1.78 (m, 2H), 1.70 - 1.63 (m, 1H), 0.97 - 0.91 (m, 27H).  $^{13}\text{C}$  NMR (101 MHz,  $\text{CDCl}_3$ )  $\delta$  163.6, 130.1, 128.7, 114.2, 102.5, 89.7, 70.9, 55.5, 45.1, 24.5, 22.3, 22.1, 18.4, 10.9. MS (DART):  $m/z$  (%) 456  $[\text{M}+\text{NH}_4]^+$ . HRMS (DART):  $[\text{M}+\text{NH}_4]^+$  Calculated for  $\text{C}_{23}\text{H}_{42}\text{O}_4\text{NSSi}$ : 456.2598; Found: 456.2598.

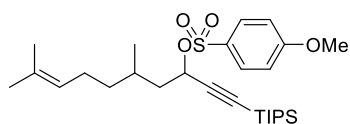

**5,9-Dimethyl-1-(triisopropylsilyl)dec-8-en-1-yn-3-yl 4-methoxybenzenesulfonate (1f).**

The product was obtained in 60% yield (1.52 g, dr = 63:37) as a colorless oil after flash column chromatography (hexane/EtOAc = 40:1).  $^1\text{H}$  NMR (400 MHz,  $\text{CDCl}_3$ )  $\delta$  7.89 - 7.83 (m, 2H), 7.00 - 6.92 (m, 2H), 5.18 - 5.10 (m, 1H), 5.10 - 5.04 (m, 1H), 3.86 (s, 3H), 2.00 - 1.90 (m, 2H), 1.75 - 1.65 (m, 5H), 1.62 - 1.56 (m, 4H), 1.40 - 1.30 (m, 1H), 1.23 - 1.11 (m, 1H), 0.98 - 0.90 (m, 24H).  $^{13}\text{C}$  NMR (101 MHz,  $\text{CDCl}_3$ )  $\delta$  Major: 163.6, 131.4, 130.1, 128.8, 124.3, 114.3, 102.3, 89.9, 71.1, 55.5, 43.3, 36.8, 29.2, 25.7, 25.2, 19.1, 18.4, 17.6, 10.9. Minor: 163.6, 131.4, 130.1, 128.8, 124.3, 114.3, 102.7, 89.9, 70.7, 55.5, 43.7, 36.7, 28.9, 25.7, 25.3, 19.1, 18.4, 17.6, 10.9. MS (DART):  $m/z$  (%) 524  $[\text{M}+\text{NH}_4]^+$ . HRMS (DART):  $[\text{M}+\text{NH}_4]^+$  Calculated for  $\text{C}_{28}\text{H}_{50}\text{O}_4\text{NSSi}$ : 524.3224; Found: 524.3224.

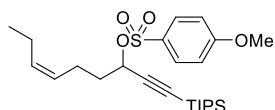

**(Z)-1-(Triisopropylsilyl)non-6-en-1-yn-3-yl 4-methoxybenzenesulfonate (1g).**

The product was obtained in 99% yield (2.38 g) as a colorless oil after flash column chromatography (hexane/EtOAc = 40:1).  $^1\text{H}$  NMR (400 MHz,  $\text{CDCl}_3$ )  $\delta$  7.86 (d,  $J = 8.8$  Hz, 2H), 6.96 (d,  $J = 8.8$  Hz, 2H), 5.46 - 5.38 (m, 1H), 5.32 - 5.24 (m, 1H), 5.09 (t,  $J = 6.5$  Hz, 1H), 3.86 (s, 3H), 2.26 - 2.18 (m, 2H), 2.07 - 1.99 (m, 2H), 1.93 - 1.86 (m, 2H), 0.99 - 0.92 (m, 24H).  $^{13}\text{C}$  NMR (101 MHz,  $\text{CDCl}_3$ )  $\delta$  163.6, 133.4, 130.1, 128.6, 126.6, 114.3, 102.1, 89.9, 71.6, 55.5, 36.4, 22.5, 20.5, 18.4, 14.2, 10.9. MS (DART):  $m/z$  (%) 482  $[\text{M}+\text{NH}_4]^+$ . HRMS (DART):  $[\text{M}+\text{NH}_4]^+$  Calculated for  $\text{C}_{25}\text{H}_{44}\text{O}_4\text{NSSi}$ : 482.2755; Found: 482.2751.

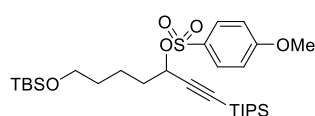

**7-((Tert-butyldimethylsilyloxy)-1-(triisopropylsilyl)hept-1-yn-3-yl 4-methoxybenzenesulfonate (1h).**

The reaction was carried out on an 18.6 mmol scale. Compound **1h** was obtained in 52.4% yield (5.54 g) as a colorless oil after flash column chromatography (hexane/EtOAc = 40:1).  $^1\text{H}$  NMR (400 MHz,  $\text{CDCl}_3$ )  $\delta$  7.86 (d,  $J = 8.8$  Hz, 2H), 6.96 (d,  $J = 8.8$  Hz, 2H), 5.08 (t,  $J = 6.4$  Hz, 1H), 3.86 (s, 3H), 3.61 - 3.57 (m, 2H), 1.93 - 1.83 (m, 2H), 1.55 - 1.48 (m, 4H), 0.99 - 0.93 (m, 21H), 0.88 (s, 9H), 0.04 (s, 6H).  $^{13}\text{C}$  NMR (101 MHz,  $\text{CDCl}_3$ )  $\delta$  163.6, 130.1, 128.7, 114.3, 102.2, 89.7, 72.0, 62.9, 55.5, 36.2, 32.1, 26.0, 21.3, 18.4, 18.3, 10.9, -5.3.

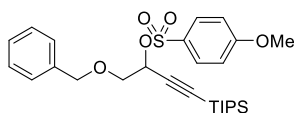

**1-(Benzyloxy)-4-(triisopropylsilyl)but-3-yn-2-yl**

**4-**

**methoxybenzenesulfonate (1i).** Compound **1i** was obtained in 99% yield

(2.52 g) as a colorless oil after flash column chromatography (hexane/EtOAc

= 40:1). <sup>1</sup>H NMR (400 MHz, CDCl<sub>3</sub>) δ 7.87 (d, *J* = 8.8 Hz, 2H), 7.37 - 7.26 (m, 5H), 6.92 (d, *J* = 8.8 Hz, 2H), 5.28 (dd, *J* = 7.2 Hz, 4.4 Hz, 1H), 4.62 - 4.53 (m, 2H), 3.84 (s, 3H), 3.79 - 3.69 (m, 2H), 0.97 (m, 21H). <sup>13</sup>C NMR (101 MHz, CDCl<sub>3</sub>) δ 163.6, 137.5, 130.1, 128.3, 128.3, 127.6, 127.5, 114.2, 99.6, 91.0, 73.2, 72.8, 70.5, 55.5, 18.3, 10.8.

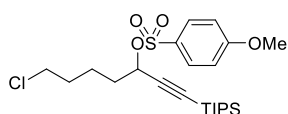

**7-Chloro-1-(triisopropylsilyl)hept-1-yn-3-yl 4-methoxybenzenesulfonate**

**(1n).** Compound **1n** was obtained in 99% yield (2.48 g) as a colorless oil after

flash column chromatography (hexane/EtOAc = 40:1). <sup>1</sup>H NMR (400 MHz,

CDCl<sub>3</sub>) δ 7.86 (d, *J* = 8.8 Hz, 2H), 6.97 (d, *J* = 8.8 Hz, 2H), 5.10 (t, *J* = 6.2 Hz, 1H), 3.86 (s, 3H), 3.51 (t, *J* = 6.2 Hz, 2H), 1.93 - 1.85 (m, 2H), 1.84 - 1.74 (m, 2H), 1.70 - 1.60 (m, 2H), 1.00 - 0.92 (m, 21H).

<sup>13</sup>C NMR (101 MHz, CDCl<sub>3</sub>) δ 163.7, 130.1, 128.5, 114.3, 101.8, 90.2, 71.6, 55.6, 44.5, 35.6, 31.8, 22.2, 18.6, 10.9. MS (DART): *m/z* (%) 490 [M+NH<sub>4</sub>]<sup>+</sup>. HRMS (DART): [M+NH<sub>4</sub>]<sup>+</sup> Calculated for C<sub>23</sub>H<sub>41</sub>O<sub>4</sub>NCISSi: 490.2209; Found: 490.2210.

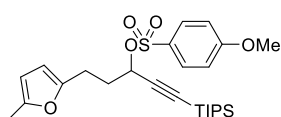

**5-(5-Methylfuran-2-yl)-1-(triisopropylsilyl)pent-1-yn-3-yl**

**4-**

**methoxybenzenesulfonate (1p).** Compound **1p** was obtained in 99% yield

(2.50 g) as a colorless oil after flash column chromatography (hexane/EtOAc

= 20:1). <sup>1</sup>H NMR (400 MHz, CDCl<sub>3</sub>) δ 7.86 (d, *J* = 8.8 Hz, 2H), 6.96 (d, *J* = 8.8 Hz, 2H), 5.88 (d, *J* = 3.0 Hz, 1H), 5.84 (d, *J* = 3.0 Hz, 1H), 5.12 (t, *J* = 6.4 Hz, 1H), 3.86 (s, 3H), 2.80 - 2.73 (m, 2H), 2.24 (s, 3H), 2.22 - 2.11 (m, 2H), 1.00 - 0.39 (m, 21H). <sup>13</sup>C NMR (101 MHz, CDCl<sub>3</sub>) δ 163.7, 151.9, 150.7, 130.1, 128.5, 114.3, 106.2, 105.9, 101.8, 90.2, 71.1, 55.5, 34.9, 23.5, 18.4, 13.5, 10.9. MS (DART): *m/z* (%) 508 [M+NH<sub>4</sub>]<sup>+</sup>. HRMS (DART): [M+NH<sub>4</sub>]<sup>+</sup> Calculated for C<sub>26</sub>H<sub>42</sub>O<sub>5</sub>NSSi: 508.2547; Found: 508.2548.

### 3.2 Synthesis of compound 1j

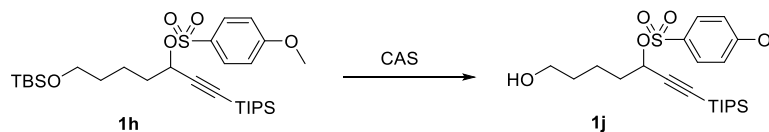

**7-Hydroxy-1-(triisopropylsilyl)hept-1-yn-3-yl 4-methoxybenzenesulfonate (1j).** To a solution of compound **1h** (11.4 g, 20 mmol, 1.0 equiv) in CH<sub>3</sub>OH/DCM (50 mL, v:v = 5:1) was added slowly *D*-camphor sulfonic acid (CAS) (2.3 g, 10 mmol, 0.5 equiv) at 0 °C. After stirring for 1.5 h at 0 °C, the reaction was quenched with triethylamine (2.8 mL, 20 mmol, 1.0 equiv). The resulting mixture was concentrated and purified by flash column chromatography on silica gel (hexane/EtOAc = 3:1) to give compound **1j** (3.10 g, 34% yield) as a colorless oil. <sup>1</sup>H NMR (400 MHz, CDCl<sub>3</sub>) δ 7.85 (d, *J* = 8.8 Hz, 2H), 6.96 (d, *J* = 8.8 Hz, 2H), 5.09 (t, *J* = 6.4 Hz, 1H), 3.86 (s, 3H), 3.65 - 3.60 (m, 2H), 1.95 - 1.84 (m, 2H), 1.62 (br s, 1H), 1.61 - 1.52 (m, 4H), 0.98 - 0.92 (m, 21H). <sup>13</sup>C NMR (101 MHz, CDCl<sub>3</sub>) δ 163.7, 130.1, 128.5, 114.3, 102.1, 89.9, 71.8, 62.6, 55.6, 36.1, 31.9, 21.1, 18.4, 10.9. MS (DART): *m/z* (%) 472 [M+NH<sub>4</sub>]<sup>+</sup>. HRMS (DART): [M+NH<sub>4</sub>]<sup>+</sup> Calculated for C<sub>23</sub>H<sub>42</sub>O<sub>5</sub>NSSi: 472.2547; Found: 472.2552.

### 3.3 Synthesis of esters 1k-1m and 1q

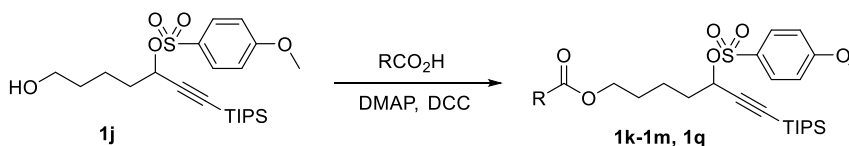

**Typical procedure for the synthesis of esters 1k.**<sup>1</sup> To a solution of compound **1j** (0.91 g, 2 mmol, 1.0 equiv) in dry DCM (5 mL) was added *N*-Boc-piperidine-4-carboxylic acid (0.92 g, 4 mmol, 2.0 equiv) and DMAP (24.4 mg, 0.2 mmol, 0.1 equiv). To the resulting mixture was added a solution of DCC (0.83 g, 4 mmol, 2 equiv) in DCM (5 mL). After stirring overnight at room temperature, the reaction mixture was filtered and concentrated. The residue was purified by flash column chromatography on silica gel to give compound **1k**.

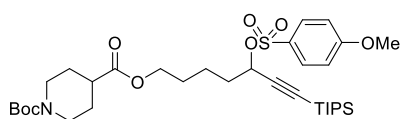

**1-(*tert*-Butyl) 4-(5-(((4-methoxyphenyl)sulfonyl)oxy)-7-(triisopropylsilyl)hept-6-yn-1-yl) piperidine-1,4-dicarboxylate**

**(1k).** Compound **1k** was obtained in 85% yield (1.13 g) as a colorless

oil after flash column chromatography (hexane/EtOAc = 4:1). <sup>1</sup>H NMR (400 MHz, CDCl<sub>3</sub>) δ 7.85 (d, *J* = 8.8 Hz, 2H), 6.96 (d, *J* = 8.8 Hz, 2H), 5.09 (t, *J* = 6.5 Hz, 1H), 4.12 – 3.94 (m, 4H), 3.86 (s, 3H), 2.88 - 2.75 (m, 2H), 2.49 - 2.39 (m, 1H), 1.93 - 1.82 (m, 4H), 1.66 - 1.55 (m, 6H), 1.45 (s, 9H), 1.01 - 0.91 (m, 21H). <sup>13</sup>C NMR (126 MHz, CDCl<sub>3</sub>) δ 174.6, 163.6, 154.7, 130.1, 128.4, 114.3, 101.8, 89.9, 79.5, 71.5, 64.2, 55.6, 43.4, 41.1, 35.9, 28.4, 27.9, 27.9, 21.3, 18.4, 10.9. MS (DART): *m/z* (%) 666 [M+H]<sup>+</sup>. HRMS (DART): [M+H]<sup>+</sup> Calculated for C<sub>34</sub>H<sub>56</sub>O<sub>8</sub>NSSi: 666.3490; Found: 666.3492.

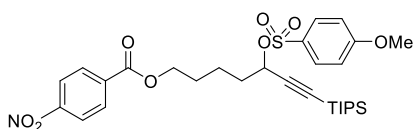

**5-(((4-Methoxyphenyl)sulfonyl)oxy)-7-(triisopropylsilyl)hept-6-yn-1-yl 4-nitrobenzoate (1l).** The reaction was conducted on a 1.2

mmol scale. Compound **1l** was obtained in 57% yield (0.41 g) as a

colorless oil after flash column chromatography (hexane/EtOAc = 10:1). <sup>1</sup>H NMR (400 MHz, CDCl<sub>3</sub>) δ 8.29 (d, *J* = 8.4 Hz, 2H), 8.21 (d, *J* = 8.4 Hz, 2H), 7.86 (d, *J* = 8.8 Hz, 2H), 6.96 (d, *J* = 8.8 Hz, 2H), 5.13 (t, *J* = 6.4 Hz, 1H), 4.37 (t, *J* = 6.5 Hz, 2H), 3.86 (s, 3H), 2.00 - 1.91 (m, 2H), 1.88 - 1.81 (m, 2H), 1.73 - 1.65 (m, 2H), 0.96 - 0.91 (m, 21H). <sup>13</sup>C NMR (126 MHz, CDCl<sub>3</sub>) δ 164.7, 163.7, 150.5, 135.6, 130.7, 130.1, 128.4, 123.5, 114.3, 101.8, 90.0, 71.4, 65.6, 55.6, 35.9, 27.9, 21.3, 18.4, 10.9. MS (DART): *m/z* (%) 621 [M+NH<sub>4</sub>]<sup>+</sup>. HRMS (DART): [M+NH<sub>4</sub>]<sup>+</sup> Calculated for C<sub>30</sub>H<sub>45</sub>O<sub>8</sub>N<sub>2</sub>SSi: 621.2660; Found: 621.2665.

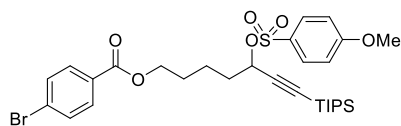

**6-(((4-Methoxyphenyl)sulfonyl)oxy)-7-(triisopropylsilyl)hept-6-yn-1-yl 4-cyanobenzoate (1m).** The reaction was conducted on a 2.0

mmol scale. Compound **1m** was obtained in 58% yield (0.74 g) as a

colorless oil after flash column chromatography (hexane/EtOAc = 10:1). <sup>1</sup>H NMR (400 MHz, CDCl<sub>3</sub>) δ 7.91 - 7.83 (m, 4H), 7.57 (d, *J* = 8.4 Hz, 2H), 6.96 (d, *J* = 8.4 Hz, 2H), 5.12 (t, *J* = 6.4 Hz, 1H), 4.30 (t, *J* = 6.7 Hz, 2H), 3.86 (s, 3H), 2.02 - 1.89 (m, 2H), 1.87 - 1.75 (m, 2H), 1.70 - 1.63 (m, 2H), 0.97 - 0.89 (m, 21H). <sup>13</sup>C NMR (126 MHz, CDCl<sub>3</sub>) δ 165.8, 163.6, 131.7, 131.1, 130.1, 129.2, 128.4, 128.0, 114.3, 101.8, 90.0, 71.5, 64.9, 55.6, 35.9, 28.0, 21.4, 18.4, 10.9. MS (DART): *m/z* (%) 654 [M+NH<sub>4</sub>]<sup>+</sup>. HRMS (DART): [M+NH<sub>4</sub>]<sup>+</sup> Calculated for C<sub>30</sub>H<sub>45</sub>O<sub>6</sub>NBrSSi: 654.1915; Found: 654.1916.



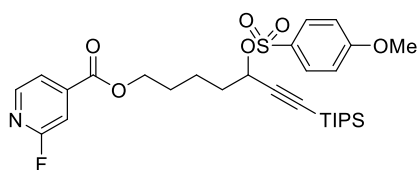

### 5-(((4-Methoxyphenyl)sulfonyl)oxy)-7-(triisopropylsilyl)hept-6-yn-1-yl 2-fluoroisonicotinate (**1q**).

The reaction was conducted on a 1.0 mmol scale. Compound **1q** was obtained in 87% yield (0.50 g) as a colorless oil after flash column chromatography

(hexane/EtOAc = 20:1).  $^1\text{H}$  NMR (400 MHz,  $\text{CDCl}_3$ )  $\delta$  8.36 (d,  $J = 5.2$  Hz, 1H), 7.86 (d,  $J = 8.8$  Hz, 2H), 7.74 (d,  $J = 5.2$  Hz, 1H), 7.48 (s, 1H), 6.96 (d,  $J = 8.8$  Hz, 2H), 5.13 (t,  $J = 6.3$  Hz, 1H), 4.36 (t,  $J = 6.4$  Hz, 2H), 3.86 (s, 3H), 1.99 - 1.90 (m, 2H), 1.88 - 1.79 (m, 2H), 1.71 - 1.63 (m, 2H), 0.96 - 0.91 (m, 21H).  $^{19}\text{F}$  NMR (376 MHz,  $\text{CDCl}_3$ )  $\delta$  -66.3 (s, 1F).  $^{13}\text{C}$  NMR (126 MHz,  $\text{CDCl}_3$ )  $\delta$  164.1 (d,  $J = 240.6$  Hz), 163.7 (d,  $J = 4.0$  Hz), 163.6, 148.5 (d,  $J = 15.1$  Hz), 142.8, 130.0, 128.3, 120.7, 114.3, 109.8, 109.3, 101.7, 90.0, 71.4, 65.8, 55.5, 35.8, 27.8, 21.3, 18.3, 10.8. MS (DART):  $m/z$  (%) 578 [ $\text{M}+\text{H}$ ] $^+$ . HRMS (DART): [ $\text{M}+\text{H}$ ] $^+$  Calculated for  $\text{C}_{29}\text{H}_{41}\text{O}_6\text{NFSSi}$ : 578.2402; Found: 578.2393.

### 3.4 Synthesis of compound **1o**

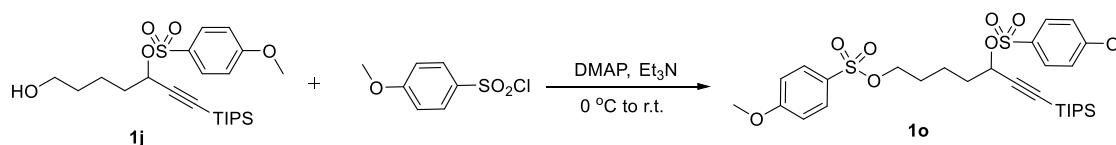

**7-(Triisopropylsilyl)hept-6-yne-1,5-diyl bis(4-methoxybenzenesulfonate) (**1o**)**. To a solution of **1j** (3.0 g, 6 mmol, 1.0 equiv) in DCM (20 mL) were added DMAP (80.6 mg, 0.66 mmol, 0.1 equiv) and triethylamine (1 mL, 7.26 mmol, 1.1 equiv) at 0 °C. 4-Methoxybenzenesulfonyl chloride (1.50 g, 7.26 mmol, 1.1 equiv) was then added. After stirring for 1 h at 0 °C, the reaction mixture was warmed to room temperature and stirred overnight. The reaction was quenched with saturated aqueous  $\text{NH}_4\text{Cl}$  and extracted with ethyl acetate. The combined organic layers were washed with brine, dried over  $\text{Na}_2\text{SO}_4$ , and filtered. The filtrate was concentrated. The residue was purified by flash column chromatography on silica gel (hexane/EtOAc = 40:1) to give compound **1o** (2.58 g, 69% yield) as a yellow oil.  $^1\text{H}$  NMR (400 MHz,  $\text{CDCl}_3$ )  $\delta$  7.86 - 7.81 (m, 4H), 7.04 - 6.99 (m, 2H), 6.98 - 6.94 (m, 2H), 5.03 (t,  $J = 6.1$  Hz, 1H), 3.99 (t,  $J = 6.4$  Hz, 2H), 3.89 (s, 3H), 3.86 (s, 3H), 1.86 - 1.75 (m, 2H), 1.72 - 1.63 (m, 2H), 1.55 - 1.45 (m, 2H), 0.98 - 0.91 (m, 21H).  $^{13}\text{C}$  NMR (101 MHz,  $\text{CDCl}_3$ )  $\delta$  163.7, 163.7, 130.1, 130.1, 128.4, 127.4, 114.5, 114.3, 101.7, 90.2, 71.4, 69.7, 55.7, 55.6, 35.6, 28.2, 20.9,

18.4, 10.9. MS (DART):  $m/z$  (%) 642  $[M+NH_4]^+$ . HRMS (DART):  $[M+NH_4]^+$  Calculated for  $C_{30}H_{48}O_8NS_2Si$ : 642.2585; Found: 642.2588.

#### 4. General Procedure for the Pd-Catalyzed *gem*-Difluoroallylation of Propargyl Sulfonates **1** and Characterization Data for Compounds **3**.

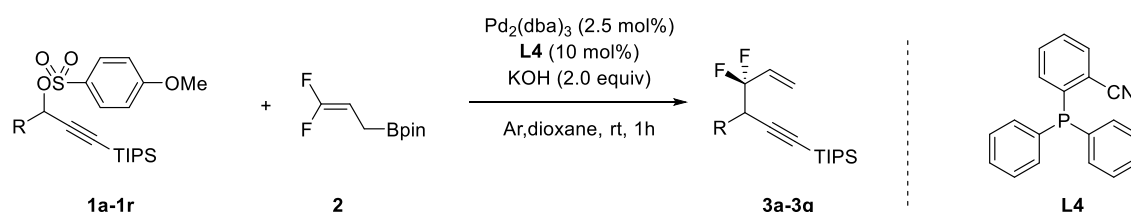

To a 25 mL of Schlenk tube were added  $\text{Pd}_2\text{dba}_3$  (9.2 mg, 0.01 mmol, 2.5 mol %), KOH (44.8 mg, 0.8 mmol, 2.0 equiv), and **L4** (11.4 mg, 0.04 mmol, 10 mol %). The mixture was evacuated and backfilled with argon three times. Dioxane (4.0 mL) was added, and the solution was stirred for 5 minutes. Then, *gem*-difluoroallylboron **2** (122 mg, 0.6 mmol, 1.5 equiv) was added, and the resulting mixture was stirred for 5 minutes. Secondary propargyl sulfonate **1** (0.4 mmol, 1.0 equiv) was added slowly. The Schlenk tube was screw-capped. After stirring for 1 h at room temperature, the resulting mixture was filtered with a pad of celite. The filtrate was concentrated, and the residue was purified with silica gel chromatography (pure petroleum) to give product **3**.

**Note:** The  $\gamma$ - and  $\alpha$ -regioisomers can be separated by column chromatography, and the yields given were the isolated yields of pure **3**.

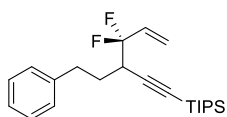

#### (4,4-Difluoro-3-phenethylhex-5-en-1-yn-1-yl)triisopropylsilane (**3a**).

Compound **3a** was obtained in 90% yield (135 mg,  $\gamma/\alpha = 21:1$  determined by  $^{19}\text{F}$  NMR before purification) as a yellow oil after flash column chromatography (100% hexane).  $^1\text{H}$  NMR (400 MHz,  $\text{CDCl}_3$ )  $\delta$  7.34 - 7.27 (m, 2H), 7.25 - 7.18 (m, 3H), 6.13 - 5.97 (m, 1H), 5.69 (dt,  $J = 17.2$  Hz, 2.8 Hz, 1H), 5.49 (d,  $J = 11.2$ , 1H), 3.05 - 2.85 (m, 2H), 2.80 - 2.89 (m, 1H), 2.07 - 1.97 (m, 1H), 1.90 - 1.78 (m, 1H), 1.13 - 1.09 (m, 21H).  $^{19}\text{F}$  NMR (376 MHz,  $\text{CDCl}_3$ )  $\delta$  -98.9 (dt,  $J = 239.3$  Hz, 8.3 Hz, 1F), -106.2 (dt,  $J = 239.3$  Hz, 13.5 Hz, 1F).  $^{13}\text{C}$  NMR (101 MHz,  $\text{CDCl}_3$ )  $\delta$  141.1, 131.0 (t,  $J = 26.3$  Hz), 128.5, 128.5, 126.1, 120.4 (t,  $J = 9.1$  Hz), 119.8 (dd,  $J = 245.4$  Hz, 244.4 Hz), 103.7, 85.9, 40.8 (t,  $J = 29.3$ Hz), 33.1, 30.4, 18.6, 11.2. MS (DART):  $m/z$  (%) 394  $[M+NH_4]^+$ . HRMS (DART):  $[M+NH_4]^+$  Calculated for  $C_{23}H_{38}NF_2Si$ : 394.2736; Found: 394.2738.

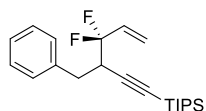

**(3-Difluorohex-5-en-1-yn-1-yl)triisopropylsilane (3b).** Compound **3b** (106 mg, 73% yield,  $\gamma/\alpha = 8.5:1$  determined by  $^{19}\text{F}$  NMR before purification) was purified with FP ECOFLEX C18 (20 g) (100% MeCN) as a yellow oil.  $^1\text{H}$  NMR (400 MHz,  $\text{CDCl}_3$ )  $\delta$  7.28 - 7.26 (m, 4H), 7.24 - 7.18 (m, 1H), 6.19 - 6.05 (m, 1H), 5.76 (dt,  $J = 17.6$  Hz, 2.0 Hz, 1H), 5.54 (d,  $J = 11.2$ , 1H), 3.21 - 3.09 (m, 2H), 2.77 - 2.70 (m, 1H), 1.01 - 0.98 (m, 21H).  $^{19}\text{F}$  NMR (376 MHz,  $\text{CDCl}_3$ )  $\delta$  -99.1 (dt,  $J = 238.8$  Hz, 10.2 Hz, 1F), -106.9 (dt,  $J = 238.8$  Hz, 14.3 Hz, 1F).  $^{13}\text{C}$  NMR (126 MHz,  $\text{CDCl}_3$ )  $\delta$  138.1, 130.9 (t,  $J = 26.5$  Hz), 129.3, 128.2, 126.5, 120.7 (t,  $J = 10.1$  Hz), 119.6 (dd,  $J = 246.9$  Hz, 244.4 Hz), 103.2 (t,  $J = 6.3$  Hz), 86.4, 43.7 (t,  $J = 29.0$  Hz), 34.8 (t,  $J = 3.8$  Hz), 18.5, 11.1. MS (DART):  $m/z$  (%) 380 ( $\text{M}+\text{NH}_4$ ) $^+$ . HRMS (DART): ( $\text{M}+\text{NH}_4$ ) $^+$  Calculated for  $\text{C}_{22}\text{H}_{36}\text{NF}_2\text{Si}$ : 380.2580; Found: 380.2581.

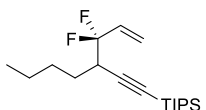

**(3-(1,1-Difluoroallyl)hept-1-yn-1-yl)triisopropylsilane (3c).** Compound **3c** (85 mg, 65% yield,  $\gamma/\alpha = 14.5:1$  determined by  $^{19}\text{F}$  NMR before purification) was purified with FP ECOFLEX C18 (20 g) (100% MeCN) as a colorless oil.  $^1\text{H}$  NMR (400 MHz,  $\text{CDCl}_3$ )  $\delta$  6.13 - 5.98 (m, 1H), 5.69 (dt,  $J = 17.6$ , 2.0 Hz, 1H), 5.48 (d,  $J = 10.4$  Hz, 1H), 2.97 - 2.85 (m, 1H), 1.74 - 1.59 (m, 2H), 1.53 - 1.41 (m, 2H), 1.40 - 1.31 (m, 2H), 1.08 - 1.05 (m, 21H), 0.91 (t,  $J = 7.2$  Hz, 3H).  $^{19}\text{F}$  NMR (376 MHz,  $\text{CDCl}_3$ )  $\delta$  -98.7 (dt,  $J = 239.0$  Hz, 10.7 Hz, 1F), -106.3 (dt,  $J = 239.0$  Hz, 13.9 Hz, 1F).  $^{13}\text{C}$  NMR (101 MHz,  $\text{CDCl}_3$ )  $\delta$  131.1 (t,  $J = 26.3$  Hz), 120.2 (t,  $J = 9.1$  Hz), 120.1 (t,  $J = 243.4$  Hz, 237.4 Hz), 104.3 (t,  $J = 6.1$  Hz), 85.1, 41.4 (t,  $J = 29.3$  Hz), 29.2, 28.1 (dd,  $J = 3.0$  Hz, 2.0 Hz), 22.2, 18.5, 13.9, 11.2. MS (DART):  $m/z$  (%) 346 [ $\text{M}+\text{NH}_4$ ] $^+$ . HRMS (DART): [ $\text{M}+\text{NH}_4$ ] $^+$  Calculated for  $\text{C}_{19}\text{H}_{38}\text{NF}_2\text{Si}$ : 346.2736; Found: 346.2737.

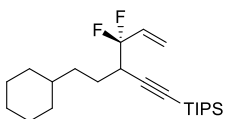

**(3-(2-Cyclohexylethyl)-4,4-difluorohex-5-en-1-yn-1-yl)triisopropylsilane (3d).** Compound **3d** was obtained in 75% yield (114 mg,  $\gamma/\alpha = 14.3:1$  determined by  $^{19}\text{F}$  NMR before purification) as a colorless oil after flash column chromatography (100% hexane).  $^1\text{H}$  NMR (400 MHz,  $\text{CDCl}_3$ )  $\delta$  6.12 - 5.97 (m, 1H), 5.69 (d,  $J = 17.2$  Hz, 1H), 5.48 (d,  $J = 10.8$  Hz, 1H), 2.92 - 2.81 (m, 1H), 1.76 - 1.64 (m, 6H), 1.54 - 1.41 (m, 2H), 1.35 - 1.18 (m, 5H), 1.08 - 1.04 (m, 21H), 0.94 - 0.86 (m, 2H).  $^{19}\text{F}$  NMR (376 MHz,  $\text{CDCl}_3$ )  $\delta$  -98.6 (dt,  $J = 238.8$  Hz, 10.2 Hz, 1F), -106.3 (dt,  $J = 238.8$  Hz, 13.0 Hz, 1F).  $^{13}\text{C}$  NMR (101 MHz,  $\text{CDCl}_3$ )  $\delta$  131.1 (t,  $J = 26.6$  Hz), 120.2 (t,  $J = 9.6$  Hz), 119.9 (dd,  $J = 245.4$  Hz, 244.4 Hz), 104.3 (t,  $J = 6.1$  Hz), 85.1, 41.7 (t,  $J = 29.3$

Hz), 37.3, 34.7, 33.6, 32.9, 26.6, 26.3, 26.3, 25.9 (t,  $J = 2.0$  Hz), 18.6, 11.2. MS (DART):  $m/z$  (%) 400  $[M+NH_4]^+$ . HRMS (DART):  $[M+NH_4]^+$  Calculated for  $C_{23}H_{44}NF_2Si$ : 400.3206; Found: 400.3207.

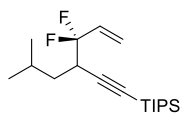

**(4,4-Difluoro-3-isobutylhex-5-en-1-yn-1-yl)triisopropylsilane (3e).** Compound **3e**

was obtained in 61% yield (80 mg,  $\gamma/\alpha = 11.7$  determined by  $^{19}F$  NMR before purification) as a colorless oil after flash column chromatography (100% hexane).  $^1H$

NMR (400 MHz,  $CDCl_3$ )  $\delta$  6.13 - 5.97 (m, 1H), 5.68 (dt,  $J = 17.2$  Hz, 3.2 Hz, 1H), 5.49 (d,  $J = 11.2$  Hz, 1H), 3.02 - 2.92 (m, 1H), 1.98 - 1.86 (m, 1H), 1.58 - 1.47 (m, 1H), 1.44 - 1.34 (m, 1H), 1.07 - 1.04 (m, 21H), 0.97 (d,  $J = 6.8$  Hz, 3H), 0.90 (d,  $J = 6.8$  Hz, 3H).  $^{19}F$  NMR (376 MHz,  $CDCl_3$ )  $\delta$  -98.7 (dt,  $J = 238.2$  Hz, 10.4 Hz, 1F), -106.5 (dt,  $J = 238.2$  Hz, 13.8 Hz, 1F).  $^{13}C$  NMR (101 MHz,  $CDCl_3$ )  $\delta$  131.0 (t,  $J = 26.4$  Hz), 120.3 (t,  $J = 9.4$  Hz), 120.0 (dd,  $J = 245.4$  Hz, 244.4 Hz), 104.1 (t,  $J = 6.1$  Hz), 85.0, 39.7 (t,  $J = 28.7$  Hz), 37.2, 25.7, 23.6, 20.9, 18.5, 11.2. MS (DART):  $m/z$  (%) 346 ( $M+NH_4$ ) $^+$ . HRMS (DART): ( $M+NH_4$ ) $^+$  Calculated for  $C_{19}H_{38}NF_2Si$ : 346.2736; Found: 346.2738.

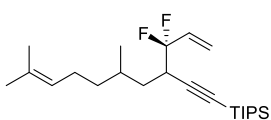

**(3-(1,1-Difluoroallyl)-5,9-dimethyldec-8-en-1-yn-1-yl)triisopropylsilane**

**(3f).** Compound **3f** was obtained in 60% yield (95 mg, dr = 56:44,  $\gamma/\alpha = 8.3:1$  determined by  $^{19}F$  NMR before purification) as a colorless oil after flash

column chromatography (100% hexane).  $^1H$  NMR (400 MHz,  $CDCl_3$ )  $\delta$  6.13 - 5.95 (m, 1H), 5.68 (dd,  $J = 17.6$  Hz, 2.4 Hz, 1H), 5.49 (d,  $J = 11.2$  Hz, 1H), 5.09 (t,  $J = 8.0$  Hz, 1H), 3.06 - 2.94 (m, 1H), 2.10 - 1.86 (m, 2H), 1.84 - 1.74 (m, 1H), 1.67 (s, 3H), 1.60 (s, 3H), 1.55 - 1.39 (m, 2H), 1.37 - 1.19 (m, 2H), 1.07 - 1.03 (m, 21H), 0.97 (d,  $J = 6.8$  Hz, 1.31H, minor), 0.89 (d,  $J = 6.8$  Hz, 1.69H, major).  $^{19}F$  NMR (376 MHz,  $CDCl_3$ )  $\delta$  -98.8 (dt,  $J = 238.4$  Hz, 8.6 Hz, 1F), -106.1 - -107.0 (m, 1F).  $^{13}C$  NMR (126 MHz,  $CDCl_3$ )  $\delta$  Major: 131.3, 131.0 (t,  $J = 26.3$  Hz), 124.5, 120.3 (t,  $J = 9.2$  Hz), 120.0 (t,  $J = 245.3$  Hz), 103.9 (t,  $J = 6.3$  Hz), 85.0, 39.5 (t,  $J = 29.2$  Hz), 37.9, 35.2, 29.9, 25.7, 25.5, 18.5, 18.4, 17.6, 11.2. Minor: 131.3, 131.0 (t,  $J = 26.3$  Hz), 124.5, 120.3 (t,  $J = 9.2$  Hz), 120.0 (t,  $J = 246.3$  Hz), 104.3 (t,  $J = 6.0$  Hz), 84.9, 39.4 (t,  $J = 29.2$  Hz), 35.9, 35.2, 30.2, 25.7, 25.2, 20.3, 18.5, 17.6, 11.2. MS (DART):  $m/z$  (%) 397  $[M+H]^+$ . HRMS (DART):  $[M+H]^+$  Calculated for  $C_{24}H_{43}F_2Si$ : 397.3097; Found: 397.3098.

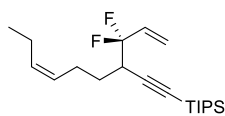

**(Z)-3-(1,1-Difluoroallyl)non-6-en-1-yn-1-yltriisopropylsilane (3g).**

Compound **3g** was obtained in 70% yield (99 mg,  $\gamma/\alpha = 15.4:1$  determined by  $^{19}\text{F}$  NMR before purification) as a colorless oil after flash column chromatography (100% hexane).  $^1\text{H}$  NMR (400 MHz,  $\text{CDCl}_3$ )  $\delta$  6.12 - 5.97 (m, 1H), 5.68 (dt,  $J = 17.2$  Hz, 2.4 Hz, 1H), 5.48 (d,  $J = 11.2$  Hz, 1H), 5.47 - 5.39 (m, 1H), 5.34 - 5.25 (m, 1H), 2.98 - 2.86 (m, 1H), 2.37 - 2.27 (m, 1H), 2.27 - 2.16 (m, 1H), 2.11 - 2.02 (m, 2H), 1.72 (m, 1H), 1.62 - 1.56 (m, 1H), 1.08 - 1.05 (m, 21H), 0.95 (t,  $J = 7.6$  Hz, 3H).  $^{19}\text{F}$  NMR (376 MHz,  $\text{CDCl}_3$ )  $\delta$  -98.9 (dt,  $J = 239.0$  Hz, 10.2 Hz, 1F), -106.2 (dt,  $J = 239.0$  Hz, 12.8 Hz, 1F).  $^{13}\text{C}$  NMR (126 MHz,  $\text{CDCl}_3$ )  $\delta$  133.3, 130.9 (t,  $J = 26.5$  Hz), 127.4, 120.3 (t,  $J = 8.8$  Hz), 119.9 (dd,  $J = 245.7$  Hz, 243.2 Hz), 103.9 (t,  $J = 6.3$  Hz), 85.2, 40.8 (t,  $J = 29.0$  Hz), 28.7, 24.5, 20.6, 18.5, 14.4, 11.2. MS (DART):  $m/z$  (%) 372  $[\text{M}+\text{NH}_4]^+$ . HRMS (DART):  $[\text{M}+\text{NH}_4]^+$  Calculated for  $\text{C}_{21}\text{H}_{40}\text{NF}_2\text{Si}$ : 372.2893; Found: 372.2894.

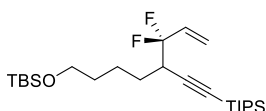

**tert-Butyl((6,6-difluoro-5-((triisopropylsilyl)ethynyl)oct-7-en-1-yl)oxy)dimethylsilane (3h).**

Compound **3h** was obtained in 68% yield (124 mg,  $\gamma/\alpha = 15.2:1$  determined by  $^{19}\text{F}$  NMR before purification) as a yellow oil after flash column chromatography (hexane/EtOAc = 20:1).  $^1\text{H}$  NMR (400 MHz,  $\text{CDCl}_3$ )  $\delta$  6.11 - 5.98 (m, 1H), 5.68 (d,  $J = 16.8$  Hz, 1H), 5.48 (d,  $J = 10.8$  Hz, 1H), 3.61 (t,  $J = 6.0$  Hz, 2H), 2.97 - 2.85 (m, 1H), 1.75 - 1.65 (m, 2H), 1.55 - 1.39 (m, 4H), 1.07 - 1.04 (m, 21H), 0.89 (s, 9H), 0.04 (s, 6H).  $^{19}\text{F}$  NMR (376 MHz,  $\text{CDCl}_3$ )  $\delta$  -98.7 (dt,  $J = 238.8$  Hz, 8.7 Hz, 1F), -106.3 (dt,  $J = 238.8$  Hz, 13.4 Hz, 1F).  $^{13}\text{C}$  NMR (126 MHz,  $\text{CDCl}_3$ )  $\delta$  131.0 (t,  $J = 26.5$  Hz), 120.3 (t,  $J = 8.8$  Hz), 119.9 (t,  $J = 244.4$  Hz, 243.2 Hz), 104.0 (t,  $J = 6.3$  Hz), 85.1, 63.1, 41.4 (t,  $J = 29.0$  Hz), 32.4, 28.4, 26.0, 23.6, 18.6, 18.4, 11.1, -5.3. MS (DART):  $m/z$  (%) 476  $[\text{M}+\text{NH}_4]^+$ . HRMS (DART):  $[\text{M}+\text{NH}_4]^+$  Calculated for  $\text{C}_{25}\text{H}_{52}\text{NF}_2\text{Si}_2$ : 476.3550; Found: 476.3550.

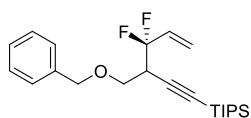

**3-((Benzyloxy)methyl)-4,4-difluorohex-5-en-1-yn-1-yltriisopropylsilane (3i).**

Compound **3i** was obtained in 70% yield (109 mg) as a colorless oil after flash column chromatography (100% hexane).  $^1\text{H}$  NMR (400 MHz,  $\text{CDCl}_3$ )  $\delta$  7.38 - 7.27 (m, 5H), 6.15 - 5.98 (m, 1H), 5.70 (d,  $J = 17.2$  Hz, 1H), 5.48 (d,  $J = 11.2$  Hz, 1H), 4.59 (s, 2H), 3.81 (dd,  $J = 9.6, 5.2$  Hz, 1H), 3.67 (dd,  $J = 9.6$  Hz, 7.2 Hz, 1H), 3.36 - 3.25 (m, 1H), 1.08 - 1.05 (m, 21H).  $^{19}\text{F}$  NMR (376 MHz,  $\text{CDCl}_3$ )  $\delta$  -98.4 (dt,  $J = 242.5$  Hz, 10.8 Hz, 1F), -103.4 (dt,  $J = 242.5$

Hz, 12.1 Hz, 1F). <sup>13</sup>C NMR (126 MHz, CDCl<sub>3</sub>) δ 137.9, 130.9 (t, *J* = 26.5 Hz), 128.3, 127.6, 127.5, 120.4 (t, *J* = 10.1 Hz), 119.2 (t, *J* = 243.2 Hz), 102.1 (t, *J* = 6.3 Hz), 85.8, 73.3, 68.6, 42.2 (t, *J* = 29.0 Hz), 18.5, 11.1. MS (DART): *m/z* (%) 410 [M+NH<sub>4</sub>]<sup>+</sup>. HRMS (DART): [M+NH<sub>4</sub>]<sup>+</sup> Calculated for C<sub>23</sub>H<sub>38</sub>ONF<sub>2</sub>Si: 410.2685; Found: 410.2684.

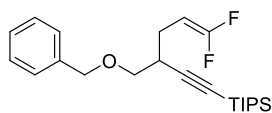

**3-((Benzyloxy)methyl)-6,6-difluorohex-5-en-1-yn-1-yltriisopropylsilane**

**(4i).** Compound **4i** was obtained in 22% yield (35 mg) as a yellow oil after flash column chromatography (100% hexane). <sup>1</sup>H NMR (400 MHz, CDCl<sub>3</sub>) δ 7.37 -

7.28 (m, 5H), 4.58 - 4.55 (m, 2H), 4.30 (dtd, *J* = 25.2 Hz, 8.0 Hz, 2.4 Hz, 1H), 3.60 (dd, *J* = 9.2 Hz, 5.2 Hz, 1H), 3.44 (t, *J* = 9.2 Hz, 1H), 2.84 - 2.77 (m, 1H), 2.40 - 2.33 (m, 1H), 2.26 - 2.18 (m, 1H), 1.08 - 1.00 (m, 21H). <sup>19</sup>F NMR (376 MHz, CDCl<sub>3</sub>) δ -87.7 (d, *J* = 44.7 Hz, 1F), -90.1 (dd, *J* = 44.7 Hz, 25.2 Hz, 1F). <sup>13</sup>C NMR (126 MHz, CDCl<sub>3</sub>) δ 156.7 (dd, *J* = 288.4 Hz, 285.6 Hz), 138.1, 128.4, 127.6, 127.5, 107.5, 83.0, 75.2 (dd, *J* = 24.1 Hz, 20.2 Hz), 73.1, 71.9, 33.4, 24.7, 18.5, 11.1. MS (DART): *m/z* (%) 410 [M+NH<sub>4</sub>]<sup>+</sup>. HRMS (DART): [M+H]<sup>+</sup> Calculated for C<sub>23</sub>H<sub>35</sub>ONF<sub>2</sub>Si: 393.2420; Found: 393.2416.

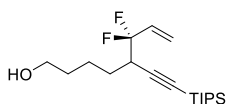

**5,5-Difluoro-4-((triisopropylsilyl)ethynyl)hept-6-en-1-ol (3j).** Compound **3j**

was obtained in 54% yield (74 mg,  $\gamma/\alpha = 4.2:1$  determined by <sup>19</sup>F NMR before purification) as a colorless oil after flash column chromatography (hexane/EtOAc = 20:1). <sup>1</sup>H NMR (400 MHz, CDCl<sub>3</sub>) δ 6.13 - 5.97 (m, 1H), 5.69 (d, *J* = 17.3 Hz, 1H), 5.49 (d, *J* = 10.8 Hz, 1H), 2.98 - 2.86 (m, 1H), 2.81 (t, *J* = 12.4 Hz, 2H), 2.42 (tt, *J* = 11.1 Hz, 3.9 Hz, 1H), 1.77 - 1.69 (m, 2H), 1.63 - 1.55 (m, 4H), 1.07 - 1.03 (m, 21H). <sup>19</sup>F NMR (376 MHz, CDCl<sub>3</sub>) δ -98.8 (dt, *J* = 238.8 Hz, 8.6 Hz, 1F), -106.5 (dt, *J* = 239.1 Hz, 12.8 Hz, 1F). <sup>13</sup>C NMR (126 MHz, CDCl<sub>3</sub>) δ 130.9 (t, *J* = 26.5 Hz), 120.4 (t, *J* = 8.8 Hz), 119.2 (dd, *J* = 254.7 Hz, 244.4 Hz), 103.8 (t, *J* = 6.3 Hz), 85.3, 62.7, 41.3 (t, *J* = 29.0 Hz), 32.2, 28.2, 23.3, 18.5, 11.1. MS (DART): *m/z* (%) 344 [M+NH<sub>4</sub>]<sup>+</sup>. HRMS (DART): [M+NH<sub>4</sub>]<sup>+</sup> Calculated for C<sub>19</sub>H<sub>38</sub>ONF<sub>2</sub>Si: 344.2685; Found: 344.2686.

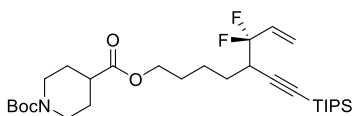

**1-(Tert-butyl) 4-(6,6-Difluoro-5-((triisopropylsilyl)ethynyl)oct-7-en-1-yl) piperidine-1,4-dicarboxylate (3k).** Compound **3k** was obtained in

74% yield (164 mg,  $\gamma/\alpha = 12.6:1$  determined by <sup>19</sup>F NMR before

purification) as a colorless oil after flash column chromatography (hexane/EtOAc = 20:1).  $^1\text{H}$  NMR (400 MHz,  $\text{CDCl}_3$ )  $\delta$  6.11 - 5.97 (m, 1H), 5.69 (d,  $J = 17.6$  Hz, 1H), 5.49 (d,  $J = 11.6$  Hz, 1H), 4.10 - 3.99 (m, 4H), 2.96 - 2.88 (m, 1H), 2.81 (t,  $J = 12.0$  Hz, 2H), 2.46 - 2.37 (m, 1H), 1.89 - 1.84 (m, 2H), 1.78 - 1.66 (m, 4H), 1.66 - 1.58 (m, 4H), 1.45 (s, 9H), 1.06 - 1.03 (m, 21H).  $^{19}\text{F}$  NMR (376 MHz,  $\text{CDCl}_3$ )  $\delta$  -98.8 (dt,  $J = 238.8$  Hz, 8.8 Hz, 1F), -106.5 (dt,  $J = 238.8$  Hz, 13.3 Hz, 1F).  $^{13}\text{C}$  NMR (126 MHz,  $\text{CDCl}_3$ )  $\delta$  174.6, 154.7, 130.8 (t,  $J = 26.3$  Hz), 120.5 (t,  $J = 9.1$ Hz), 119.8 (dd,  $J = 245.7$  Hz, 244.4 Hz), 103.6 (t,  $J = 6.3$  Hz), 84.5, 79.6, 64.4, 43.4, 41.3 (t,  $J = 29.5$  Hz), 41.1, 28.4, 28.2, 28.1, 28.0, 23.7, 18.5, 11.1. MS (DART):  $m/z$  (%) 556  $[\text{M}+\text{H}]^+$ . HRMS (DART):  $[\text{M}+\text{H}]^+$  Calculated for  $\text{C}_{30}\text{H}_{52}\text{O}_4\text{NF}_2\text{Si}$ : 556.3628; Found: 556.3628.

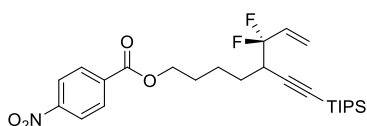

**6,6-Difluoro-5-((triisopropylsilyl)ethynyl)oct-7-en-1-yl 4-**

**nitrobenzoate (3l).** Compound **3l** was obtained in 79% yield (156 mg,

$\gamma/\alpha = 11.5:1$  determined by  $^{19}\text{F}$  NMR before purification) as a yellow

oil after flash column chromatography (hexane/EtOAc = 20:1).  $^1\text{H}$  NMR (400 MHz,  $\text{CDCl}_3$ )  $\delta$  8.31 - 8.25 (m, 2H), 8.23 - 8.17 (m, 2H), 6.12 - 5.97 (m, 1H), 5.70 (d,  $J = 17.2$  Hz, 1H), 5.50 (d,  $J = 11.6$  Hz, 1H), 4.38 (t,  $J = 6.1$  Hz, 2H), 3.00 - 2.88 (m, 1H), 1.89 - 1.76 (m, 4H), 1.69 - 1.57 (m, 2H), 1.05 - 1.01 (m, 21H).  $^{19}\text{F}$  NMR (376 MHz,  $\text{CDCl}_3$ )  $\delta$  -98.8 (dt,  $J = 239.1$  Hz, 8.1 Hz, 1F), -106.5 (dt,  $J = 239.1$  Hz, 12.9 Hz, 1F).  $^{13}\text{C}$  NMR (101 MHz,  $\text{CDCl}_3$ )  $\delta$  165.9, 131.7, 131.1, 130.9 (t,  $J = 26.3$  Hz), 129.3, 128.0, 120.4 (t,  $J = 9.7$  Hz), 119.8 (dd,  $J = 246.4$  Hz, 244.4 Hz), 103.7 (t,  $J = 5.8$  Hz), 85.6, 65.1, 41.4 (t,  $J = 29.3$  Hz), 28.3, 28.2 (dd,  $J = 3.0$  Hz, 1.0 Hz), 23.8, 18.5, 11.1. MS (DART):  $m/z$  (%) 511  $[\text{M}+\text{NH}_4]^+$ . HRMS (DART):  $[\text{M}+\text{NH}_4]^+$  Calculated for  $\text{C}_{26}\text{H}_{41}\text{O}_4\text{N}_2\text{F}_2\text{Si}$ : 511.2798; Found: 511.2797.

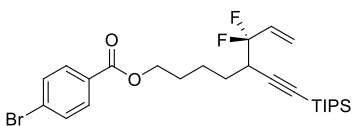

**6,6-Difluoro-5-((triisopropylsilyl)ethynyl)oct-7-en-1-yl 4-**

**bromobenzoate (3m).** Compound **3m** was obtained in 88% yield (185

mg,  $\gamma/\alpha = 21:1$  determined by  $^{19}\text{F}$  NMR before purification) as a yellow

oil after flash column chromatography (hexane/ EtOAc = 20:1).  $^1\text{H}$  NMR (400 MHz,  $\text{CDCl}_3$ )  $\delta$  7.89 (d,  $J = 8.8$  Hz, 2H), 7.57 (d,  $J = 8.8$  Hz, 2H), 6.12 - 5.96 (m, 1H), 5.69 (d,  $J = 17.6$  Hz, 1H), 5.49 (d,  $J = 11.2$  Hz, 1H), 4.32 (t,  $J = 5.6$  Hz, 2H), 2.98 - 2.88 (m, 1H), 1.86 - 1.74 (m, 4H), 1.61 - 1.52 (m, 2H), 1.05 - 1.01 (m, 21H).  $^{19}\text{F}$  NMR (376 MHz,  $\text{CDCl}_3$ )  $\delta$  -98.8 (dt,  $J = 239.1$  Hz, 8.0 Hz, 1F), -106.5 (dt,  $J = 239.1$  Hz, 13.2 Hz, 1F).  $^{13}\text{C}$  NMR (101 MHz,  $\text{CDCl}_3$ )  $\delta$  165.8, 131.6, 131.1, 130.9 (t,  $J = 26.3$  Hz),

129.3, 127.9, 120.4 (t,  $J = 9.1$  Hz), 119.7 (dd,  $J = 245.3$  Hz, 243.4 Hz), 103.6 (t,  $J = 13.1$  Hz), 85.6, 65.1, 43.3 (t,  $J = 29.3$  Hz), 28.3, 28.2, 23.8, 18.5, 11.1. MS (DART):  $m/z$  (%) 544  $[M+NH_4]^+$ . HRMS (DART):  $[M+NH_4]^+$  Calculated for  $C_{26}H_{41}O_2NBrF_2Si$ : 544.2053; Found: 544.2048.

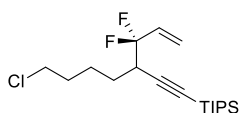

**(7-Chloro-3-(1,1-difluoroallyl)hept-1-yn-1-yl)triisopropylsilane (3n).**

Compound **3n** (89 mg, 62% yield,  $\gamma/\alpha = 12.4:1$  determined by  $^{19}F$  NMR before purification) was purified with FP ECOFLEX C18 (20 g) (100% MeCN) as a yellow oil.  $^1H$  NMR (400 MHz,  $CDCl_3$ )  $\delta$  6.13 - 5.97 (m, 1H), 5.70 (dt,  $J = 17.2$  Hz, 2.4 Hz, 1H), 5.50 (d,  $J = 11.2$  Hz, 1H), 3.54 (t,  $J = 6.4$  Hz, 2H), 2.98 - 2.86 (m, 1H), 1.87 - 1.76 (m, 3H), 1.76 - 1.68 (m, 1H), 1.59 - 1.54 (m, 2H), 1.08 - 1.05 (m, 21H).  $^{19}F$  NMR (376 MHz,  $CDCl_3$ )  $\delta$  -98.9 (dt,  $J = 239.1$  Hz, 10.3 Hz, 1F), -106.6 (dt,  $J = 239.1$  Hz, 14.2 Hz, 1F).  $^{13}C$  NMR (101 MHz,  $CDCl_3$ )  $\delta$  130.9 (t,  $J = 26.3$  Hz), 120.4 (t,  $J = 10.1$  Hz), 119.8 (dd,  $J = 246.4$  Hz, 244.4 Hz), 103.6 (t,  $J = 7.1$  Hz), 85.7, 44.6, 41.3 (t,  $J = 29.3$  Hz), 32.1, 27.8, 24.5, 18.5, 11.2. MS (DART):  $m/z$  (%) 380  $[M+NH_4]^+$ . HRMS (DART):  $[M+NH_4]^+$  Calculated for  $C_{19}H_{37}NCIF_2Si$ : 380.2346; Found: 380.2348.

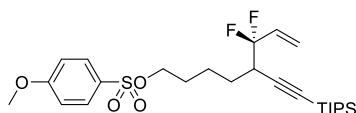

**6,6-Difluoro-5-((triisopropylsilyl)ethynyl)oct-7-en-1-yl**

**4-methoxybenzenesulfonate (3o).** Compound **3o** was obtained in 70%

yield (144 mg,  $\gamma/\alpha = 17.8:1$  determined by  $^{19}F$  NMR before purification) as a yellow oil after flash column chromatography (hexane/EtOAc = 20:1).  $^1H$  NMR (400 MHz,  $CDCl_3$ )  $\delta$  7.83 (d,  $J = 8.8$  Hz, 2H), 7.05 (d,  $J = 8.8$  Hz, 2H), 6.09 - 5.94 (m, 1H), 5.67 (d,  $J = 17.6$  Hz, 1H), 5.48 (d,  $J = 11.2$  Hz, 1H), 4.01 (t,  $J = 6.3$  Hz, 2H), 3.89 (s, 3H), 2.89 - 2.78 (m, 1H), 1.78 - 1.58 (m, 4H), 1.55 - 1.38 (m, 2H), 1.07 - 1.02 (m, 21H).  $^{19}F$  NMR (376 MHz,  $CDCl_3$ )  $\delta$  - 98.9 (dt,  $J = 239.1$  Hz, 8.0 Hz, 1F), - 106.5 (dt,  $J = 239.1$  Hz, 12.6 Hz, 1F).  $^{13}C$  NMR (126 MHz,  $CDCl_3$ )  $\delta$  163.7, 130.8 (t,  $J = 26.5$  Hz), 130.0, 127.5, 120.5 (t,  $J = 10.1$  Hz), 119.7 (dd,  $J = 245.7$  Hz, 244.4 Hz), 114.4, 103.4 (t,  $J = 6.3$  Hz), 85.7, 69.9, 55.7, 41.3 (t,  $J = 29.0$  Hz), 28.4, 27.7, 23.0, 18.5, 11.1. MS (DART):  $m/z$  (%) 532  $[M+NH_4]^+$ . HRMS (DART):  $[M+NH_4]^+$  Calculated for  $C_{26}H_{44}O_4NF_2SSi$ : 532.2723; Found: 532.2726.

**Procedure of Gram-Scale Synthesis 3o:** To a 100 mL of Schlenk tube were added  $Pd_2dba_3$  (114.5 mg, 0.125 mmol, 2.5 mol %), KOH (0.56 g, 10 mmol, 2.0 equiv), and **L4** (143.6 mg, 0.5 mmol, 10



mol %). The mixture was evacuated and backfilled with argon three times. Dioxane (40.0 mL) was added, and the solution was stirred for 5 minutes. Then, *gem*-difluoroallylboron **2** (1.52 g, 7.5 mmol, 1.5 equiv) was added, and the resulting mixture stirred for 10 minutes. **1o** (3.12 g, 5 mmol, 1.0 equiv) was added slowly. The Schlenk tube was screw-capped. After stirring overnight at room temperature, the mixture was filtered with a pad of celite. The filtrate was concentrated, and compound **3o** was obtained in 72% yield (1.85 g) as a yellow oil after flash column chromatography (hexane/EtOAc = 20:1).

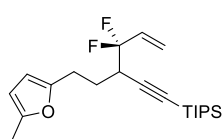

**(4,4-Difluoro-3-(2-(5-methylfuran-2-yl)ethyl)hex-5-en-1-yn-1-**

**yl)triisopropylsilane (3p).** Compound **3p** was obtained in 64% yield (97 mg,  $\gamma/\alpha$  = 10.1:1 determined by  $^{19}\text{F}$  NMR before purification) as a colorless oil after flash

column chromatography (100% hexane).  $^1\text{H}$  NMR (400 MHz,  $\text{CDCl}_3$ )  $\delta$  6.11 - 5.95 (m, 1H), 5.87 (d,  $J = 3.2$  Hz, 1H), 5.82 (d,  $J = 3.2$  Hz, 1H), 5.68 (dt,  $J = 17.2$  Hz, 2.0 Hz, 1H), 5.48 (d,  $J = 11.1$  Hz, 3H), 2.99 - 2.83 (m, 2H), 2.77 - 2.65 (m, 1H), 2.23 (s, 3H), 2.09 - 1.99 (m, 1H), 1.81 - 1.72 (m, 1H), 1.07 - 1.04 (m, 21H).  $^{19}\text{F}$  NMR (376 MHz,  $\text{CDCl}_3$ )  $\delta$  -99.0 (dt,  $J = 239.5$  Hz, 9.9 Hz, 1F), -106.2 (dt,  $J = 239.5$  Hz, 13.6 Hz, 1F).  $^{13}\text{C}$  NMR (101 MHz,  $\text{CDCl}_3$ )  $\delta$  152.8, 150.7, 130.9 (t,  $J = 26.3$  Hz), 120.5 (t,  $J = 9.1$  Hz), 119.8 (dd,  $J = 246.4, 244.4$  Hz), 106.1, 105.8, 103.4 (t,  $J = 6.1$  Hz), 85.9, 40.7 (t,  $J = 29.3$  Hz), 27.3, 25.5, 18.6, 13.5, 11.2. MS (FI):  $m/z$  (%) 380  $[\text{M}]^+$ . HRMS (FI):  $[\text{M}]^+$  Calculated for  $\text{C}_{22}\text{H}_{34}\text{OF}_2\text{Si}$ : 380.2342 Found: 380.2326.

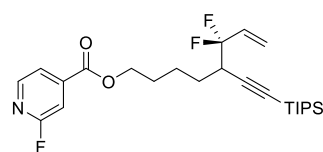

**6,6-Difluoro-5-((triisopropylsilyl)ethynyl)oct-7-en-1-yl**

**2-**

**fluoroisonicotinate (3q).** Compound **3q** was obtained in 68% yield (127 mg,  $\gamma/\alpha = 13.1:1$  determined by  $^{19}\text{F}$  NMR before purification) as a colorless

oil after flash column chromatography (100% hexane).  $^1\text{H}$  NMR (400 MHz,  $\text{CDCl}_3$ )  $\delta$  8.36 (d,  $J = 5.1$  Hz, 1H), 7.75 - 7.72 (m, 1H), 7.48 (s, 1H), 6.12 - 5.92 (m, 1H), 5.69 (dt,  $J = 17.4, 2.6$  Hz, 1H), 5.50 (d,  $J = 11.0$  Hz, 1H), 4.41 - 4.35 (m, 2H), 2.99 - 2.87 (m, 1H), 1.98 - 1.78 (m, 4H), 1.62 - 1.52 (m, 2H), 1.04 - 1.00 (m, 21H).  $^{19}\text{F}$  NMR (376 MHz,  $\text{CDCl}_3$ )  $\delta$  -66.29 (s, 1F), -98.38 - -99.30 (m, 1F), -106.63 (dt,  $J = 239.1, 13.6$  Hz, 1F).  $^{13}\text{C}$  NMR (126 MHz,  $\text{CDCl}_3$ )  $\delta$  164.2 (d,  $J = 240.2$  Hz), 163.8 (d,  $J = 8.4$  Hz), 163.8, 148.6 (d,  $J = 14.4$  Hz), 143.24, 130.82 (t,  $J = 26.3$  Hz), 120.54 (t,  $J = 9.3$  Hz), 119.73 (t,  $J = 224.4$  Hz), 109.75 (d,  $J = 37.6$  Hz), 103.49 (t,  $J = 6.2$  Hz), 85.66, 66.05, 41.29 (t,  $J =$

29.5 Hz), 29.43, 28.10, 23.72, 18.60, 11.09. MS (DART):  $m/z$  (%) 468  $[M+NH_4]^+$ . HRMS (DART):  $[M+NH_4]^+$  Calculated for  $C_{25}H_{37}O_2NF_3Si$ : 468.2540; Found: 468.2538.

## 5. Transformations of Compound 3o.

### Synthesis of compound 5<sup>2</sup>

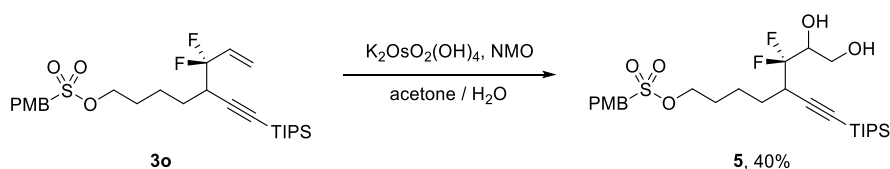

**3,3-Difluoro-8-(((4-methoxyphenyl)peroxy)thio)oxy)-4-((triisopropylsilyl)ethynyl)octane-1,2-diol (5).** To a 25 mL of Schlenk tube was added compound **3o** (103 mg, 0.2 mmol, 1.0 equiv),  $K_2OsO_4 \cdot 2H_2O$  (3.7 mg, 0.01 mmol, 0.05 equiv), *N*-methylmorpholine oxide (NMO) (117 mg, 0.4 mmol, 2.0 equiv), and acetone/ $H_2O$  (2 ml, v:v = 5:1). After stirring for 24 h, the reaction was quenched with saturated aqueous  $Na_2SO_3$  and extracted with EtOAc. The combined organic layers were washed with brine, dried over  $Na_2SO_4$ , and filtered. The filtrate was concentrated under reduced pressure. Compound **5** was obtained in 40% yield (44 mg) as a colorless oil after flash column chromatography (hexane/EtOAc = 2:1).  $^1H$  NMR (400 MHz,  $CDCl_3$ )  $\delta$  7.84 (d,  $J$  = 8.8 Hz, 2H), 7.00 (d,  $J$  = 8.8 Hz, 2H), 4.25 – 4.12 (m, 1 H), 4.02 (t,  $J$  = 6.2 Hz, 2H), 3.96 - 3.89 (m, 2H), 3.89 (s, 3H), 3.21 – 3.08 (m, 1H), 2.85 - 2.71 (m, 1H), 1.81 - 1.64 (m, 5H), 1.60 - 1.57 (m, 2H), 1.50 - 1.40 (m, 1H), 1.06 - 1.02 (m, 21H).  $^{19}F$  NMR (376 MHz,  $CDCl_3$ )  $\delta$  -117.9 (dd,  $J$  = 246.5 Hz, 24.1 Hz, 1F), -119.9 (ddd,  $J$  = 246.5 Hz, 21.8 Hz, 3.4 Hz, 1F).  $^{13}C$  NMR (126 MHz,  $CDCl_3$ )  $\delta$  163.7, 130.0, 127.5, 122.3 (t,  $J$  = 253.3 Hz), 114.4, 103.4 (d,  $J$  = 12.6 Hz), 86.2, 71.1 (dd,  $J$  = 32.8 Hz, 23.9 Hz), 69.9, 60.6, 55.7, 37.1 (dd,  $J$  = 32.8 Hz, 23.9 Hz), 28.4, 25.9, 23.1, 18.5, 11.1. MS (DART):  $m/z$  (%) 549  $[M+H]^+$ . HRMS (DART):  $[M+H]^+$  Calculated for  $C_{26}H_{43}O_6F_2SSi$ : 549.2512; Found: 549.2511.

### Synthesis of compound 6

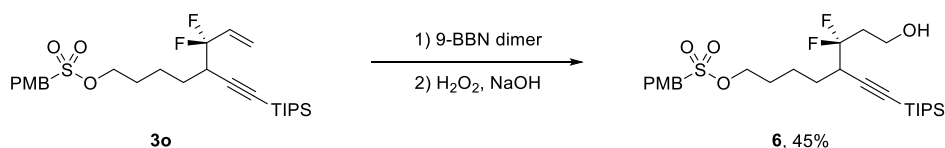

### 3,3-Difluoro-8-(((4-methoxyphenyl)peroxy)thio)oxy)-4-((triisopropylsilyl)ethynyl)octan-1-ol

**(6).** To a 25 mL of Schlenk tube was added 9-BBN dimer (146 mg, 0.6 mmol, 3.0 equiv) in the glove

box. The tube was removed from the glovebox, evacuated, and backfilled with argon three times. Compound **3o** (103 mg, 0.2 mmol, 1.0 equiv) and THF (2 mL) were then added. The Schlenk tube was sealed with a screwed cap and put into a 60 °C oil bath. After stirring for 12 h, the reaction mixture was cooled to room temperature, aqueous H<sub>2</sub>O<sub>2</sub> (1 mL, 30 wt%) and aqueous NaOH (1 mL, 3.0 M) were added. The resulting mixture was heated to reflux for 3h. Upon cooling to room temperature, the mixture was quenched with saturated aqueous Na<sub>2</sub>S<sub>2</sub>O<sub>3</sub> and extracted with EtOAc. The combined organic layers were washed with brine, dried over Na<sub>2</sub>SO<sub>4</sub>, and filtered. The filtrate was concentrated under reduced pressure. Compound **6** was obtained in 45% yield (48 mg) as a colorless oil after flash column chromatography (hexane/EtOAc = 2:1). <sup>1</sup>H NMR (400 MHz, CDCl<sub>3</sub>) δ 7.83 (d, *J* = 8.8 Hz, 2H), 7.05 (d, *J* = 8.8 Hz, 2H), 4.02 (t, *J* = 6.0 Hz, 2H), 3.92 - 3.91 (m, 2H), 3.88 (s, 3H), 2.94 - 2.78 (m, 1H), 2.42 - 2.20 (m, 2H), 1.73 - 1.63 (m, 5H), 1.55 - 1.41 (m, 2H), 1.09 - 1.02 (m, 21H). <sup>19</sup>F NMR (376 MHz, CDCl<sub>3</sub>) δ -100.5 - -101.4 (m, 1F), -103.5 - -104.3 (m, 1F). <sup>13</sup>C NMR (126 MHz, CDCl<sub>3</sub>) δ 163.7, 130.1, 127.5, 123.7 (dd, *J* = 248.2 Hz, 245.7 Hz), 114.4, 103.7 (dd, *J* = 8.8 Hz, 5.0 Hz), 86.0, 69.9, 56.8 (dd, *J* = 6.3 Hz, 5.0 Hz), 55.7, 40.8 (t, *J* = 27.7 Hz), 37.4 (t, *J* = 23 Hz), 28.4, 27.3, 23.2, 18.5, 11.1. MS (DART): *m/z* (%) 533 [M+H]<sup>+</sup>. HRMS (DART): [M+H]<sup>+</sup> Calculated for C<sub>26</sub>H<sub>43</sub>O<sub>5</sub>F<sub>2</sub>SSi: 533.2563; Found: 533.2560.

### Synthesis of compound **8**<sup>3</sup>

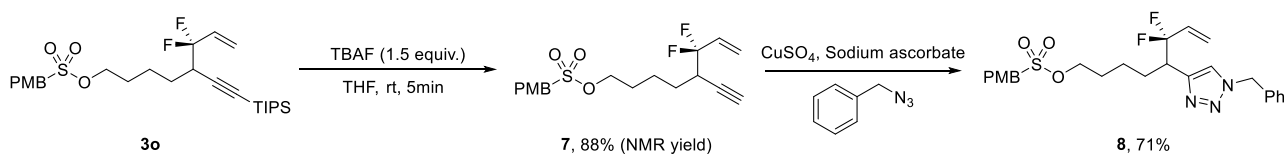

### **1-Benzyl-4-(3,3-difluoro-8-(((4-methoxyphenyl)peroxy)thio)oxy)oct-1-en-4-yl)-1H-1,2,3-**

**triazole (8).** To a solution of **3o** (90 mg, 0.42 mmol, 1.0 equiv) in THF (2 mL) was added TBAF (0.5 mL, 0.5 mmol, 1.2 equiv, 1 M in THF) at 0 °C. The mixture was stirred for 5 minutes before being quenched with H<sub>2</sub>O (2 mL). Then, (azidomethyl)benzene (58.6 mg, 0.44 mmol, 1.2 equiv), CuSO<sub>4</sub> (11.8 mg, 0.074 mmol, 0.2 equiv) and sodium ascorbate (44 mg, 0.22 mmol, 0.6 equiv) were added at room temperature. The resulting mixture was stirred for 12 hours at room temperature and concentrated. The residue was extracted with ethyl acetate. The combined organic layers were washed with brine, dried over Na<sub>2</sub>SO<sub>4</sub>, and filtered. The filtrate was concentrated. Compound **8** (129 mg, 63% yield, 2

steps) was purified with silica gel chromatography (Petroleum ether/EtOAc = 6:1) as a colorless oil.  $^1\text{H}$  NMR (400 MHz,  $\text{CDCl}_3$ )  $\delta$  7.78 (d,  $J = 8.8$  Hz, 2H), 7.42 - 7.33 (m, 4H), 7.25 - 7.21 (m, 2H), 7.00 (d,  $J = 8.8$  Hz, 2H), 5.87 - 5.72 (m, 1H), 5.56 - 5.47 (m, 3H), 5.35 (d,  $J = 10.8$  Hz, 1H), 3.97 - 3.91 (m, 2H), 3.89 (s, 3H), 3.37 - 3.25 (m, 1H), 1.86 - 1.76 (m, 1H), 1.68 - 1.58 (m, 3H), 1.27 - 1.20 (m, 2H).  $^{19}\text{F}$  NMR (376 MHz,  $\text{CDCl}_3$ )  $\delta$  - 100.4 (dt,  $J = 242.5$  Hz, 12.1 Hz, 1F), - 104.1 (dt,  $J = 242.5$  Hz, 14.2 Hz, 1F).  $^{13}\text{C}$  NMR (126 MHz,  $\text{CDCl}_3$ )  $\delta$  163.7, 134.6, 131.2 (t,  $J = 26.5$  Hz), 130.0, 129.1, 128.7, 127.9, 127.3, 122.6, 122.6, 120.6 (t,  $J = 243.2$  Hz), 120.4 (t,  $J = 8.8$  Hz), 114.4, 69.9, 55.7, 54.2, 44.7 (t,  $J = 26.5$  Hz), 28.5, 27.6, 23.0. MS (DART):  $m/z$  (%) 492  $[\text{M}+\text{H}]^+$ . HRMS (DART):  $[\text{M}+\text{H}]^+$  Calculated for  $\text{C}_{24}\text{H}_{28}\text{O}_4\text{N}_3\text{F}_2\text{S}$ : 492.1762; Found: 492.1764.

## 6. References

- 1 R. J. Rahaim, R. E. Maleczka, *Synthesis* **2006**, *19*, 3316.
- 2 J. C. Hethcox, S. E. Shockley, B. M. Stoltz, *Angew. Chem., Int. Ed.* **2016**, *55*, 16092; *Angew. Chem.* **2016**, *128*, 16326.
- 3 a) F. E. Michael, A. P. Duncan, Z. K. Sweeney, R. G. Bergman, *J. Am. Chem. Soc.* **2005**, *127*, 1752;  
b) C. Deraedt, N. Pinaud, D. Astruc, *J. Am. Chem. Soc.* **2014**, *136*, 12092.

## 7. Copies of $^1\text{H}$ NMR, $^{19}\text{F}$ NMR and $^{13}\text{C}$ NMR Spectra

### 5-Phenyl-1-(triisopropylsilyl)pent-1-yn-3-yl 4-methoxybenzenesulfonate (1a)

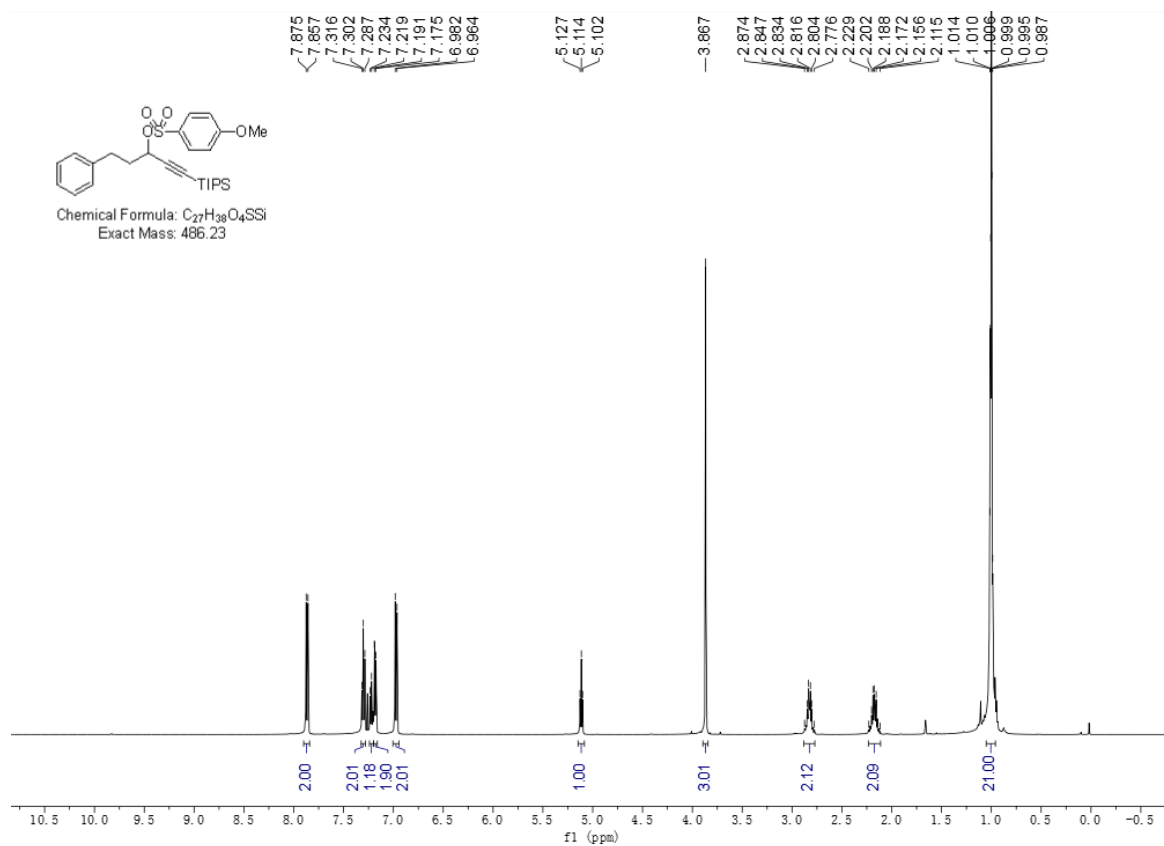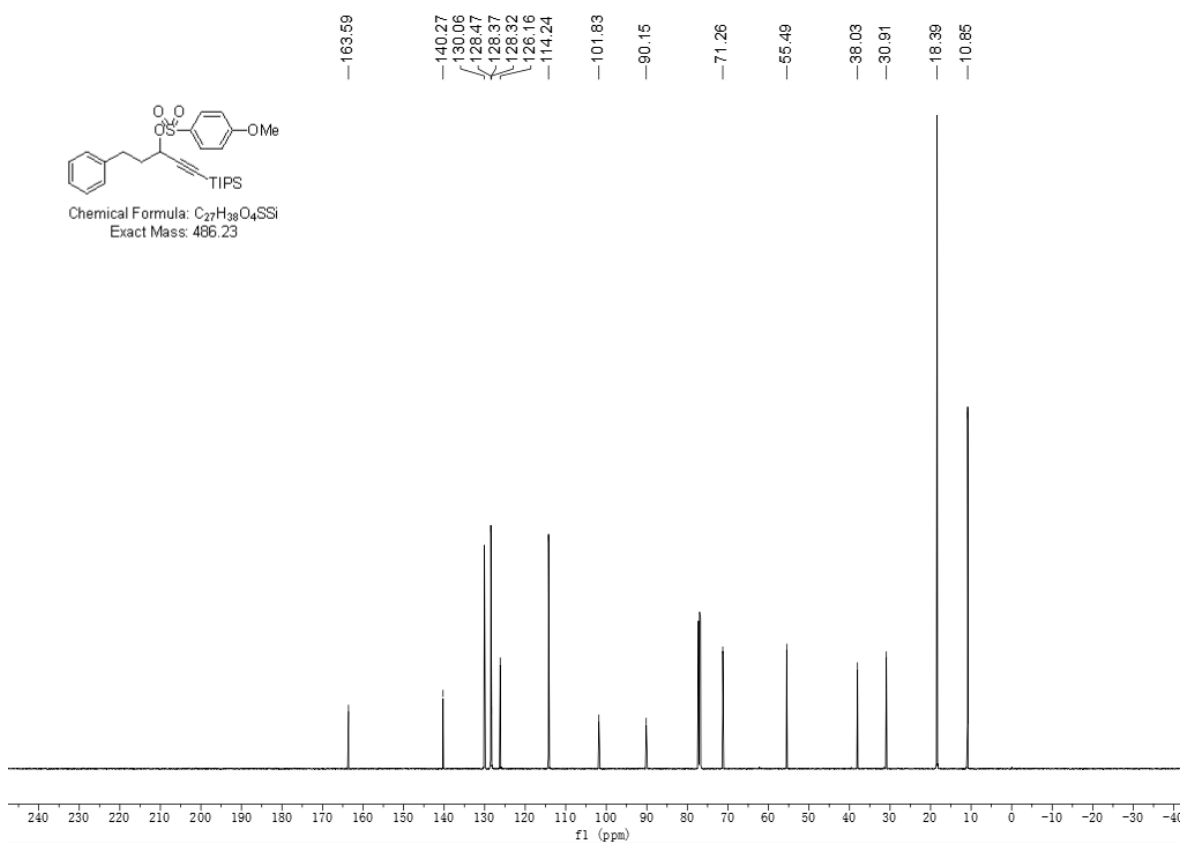

# 1-Phenyl-4-(triisopropylsilyl)but-3-yn-2-yl 4-methoxybenzenesulfonate (1b)

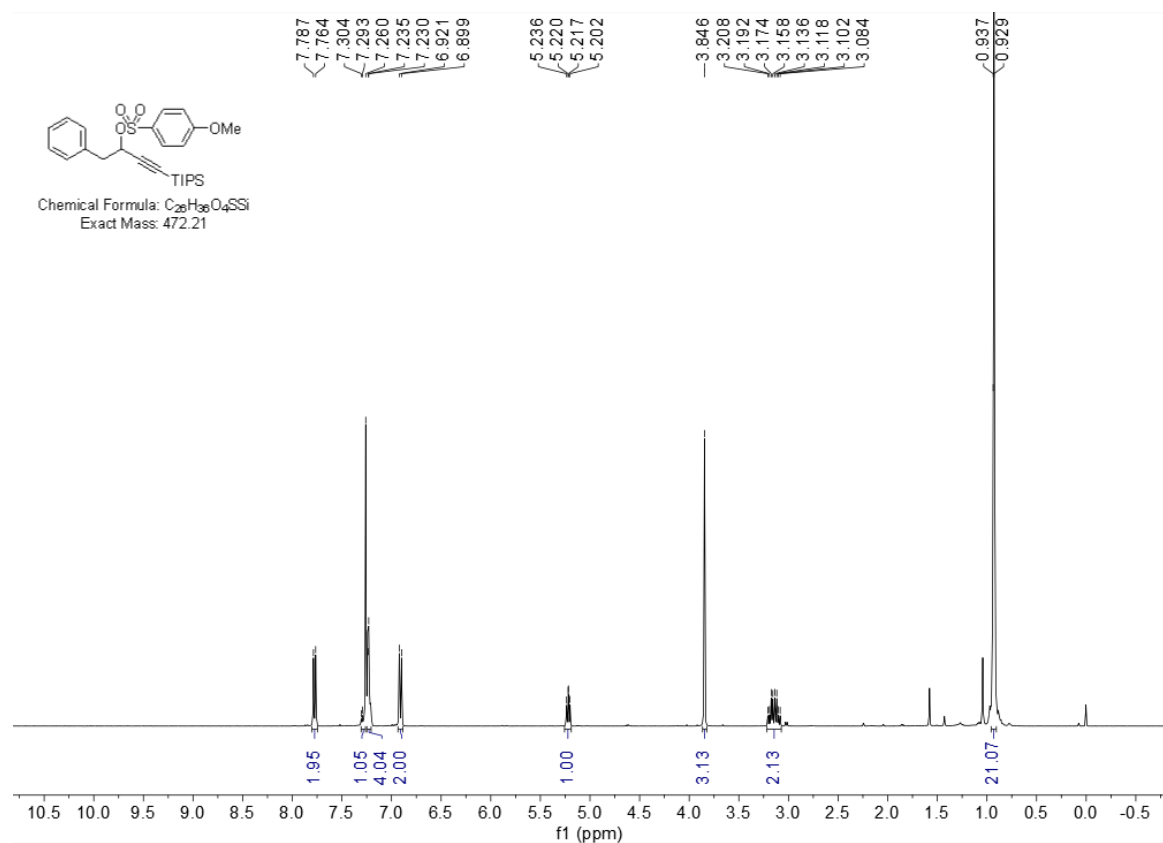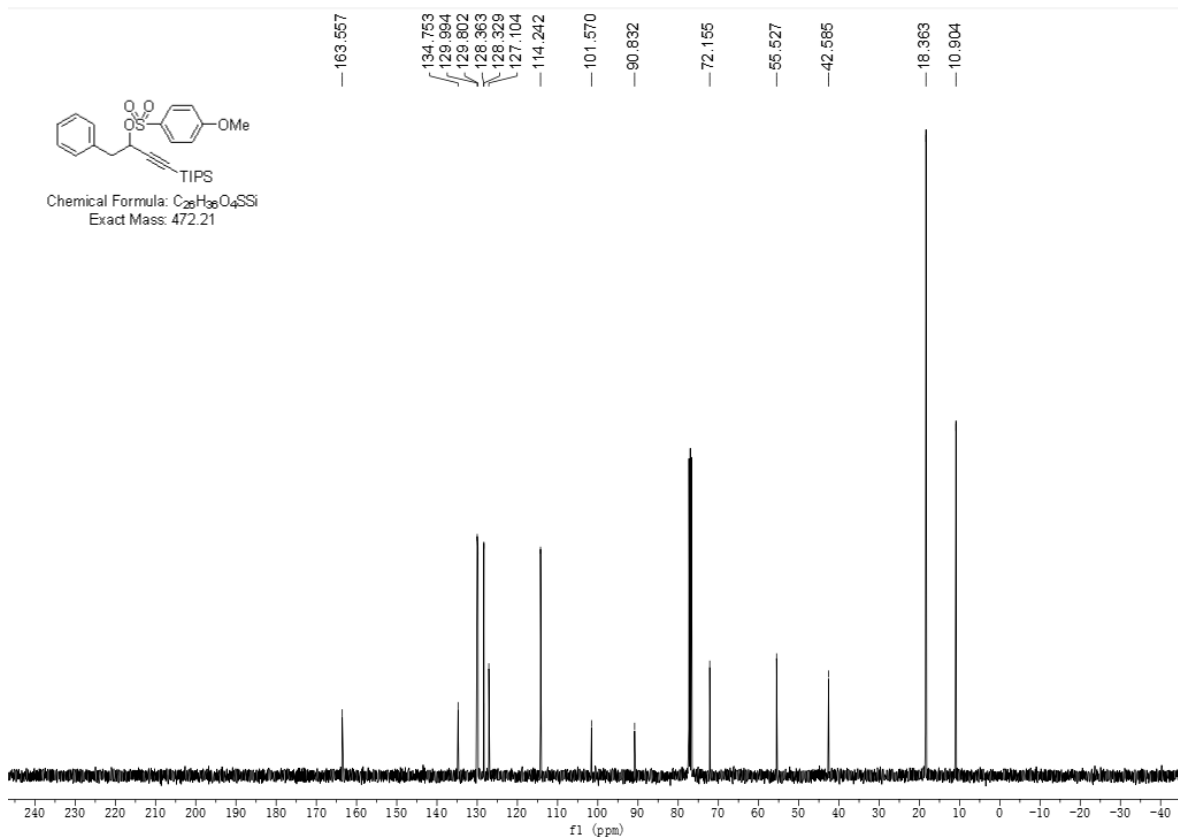

# 1-(Triisopropylsilyl)hept-1-yn-3-yl 4-methoxybenzenesulfonate (1c)

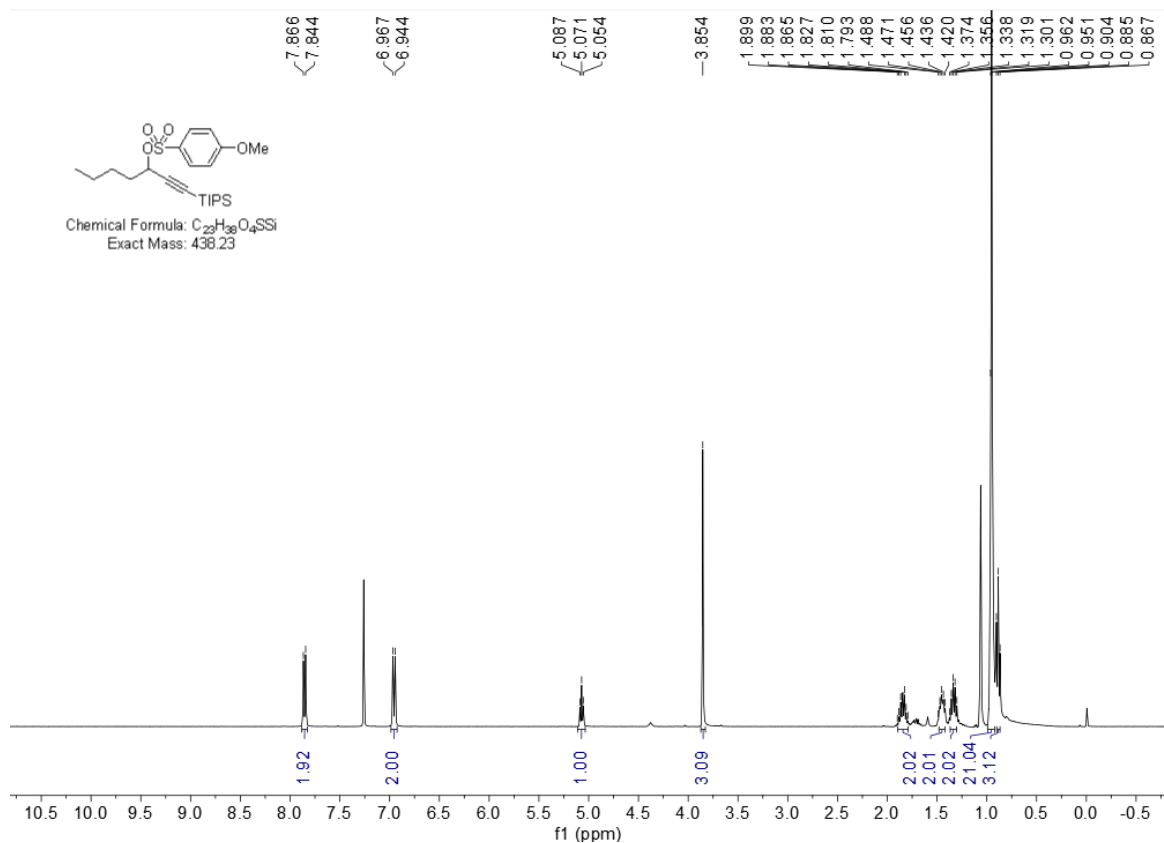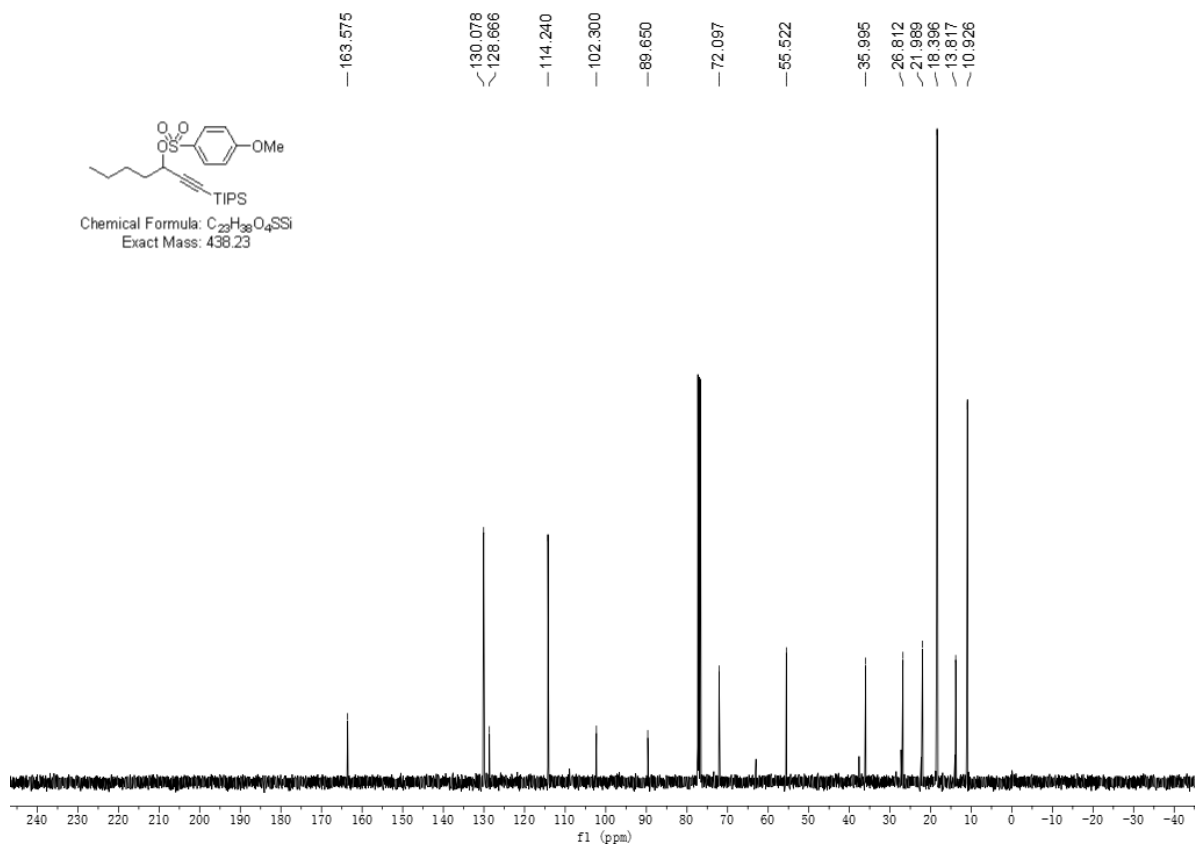

### 5-Cyclohexyl-1-(triisopropylsilyl)pent-1-yn-3-yl 4-methoxybenzenesulfonate (1d)

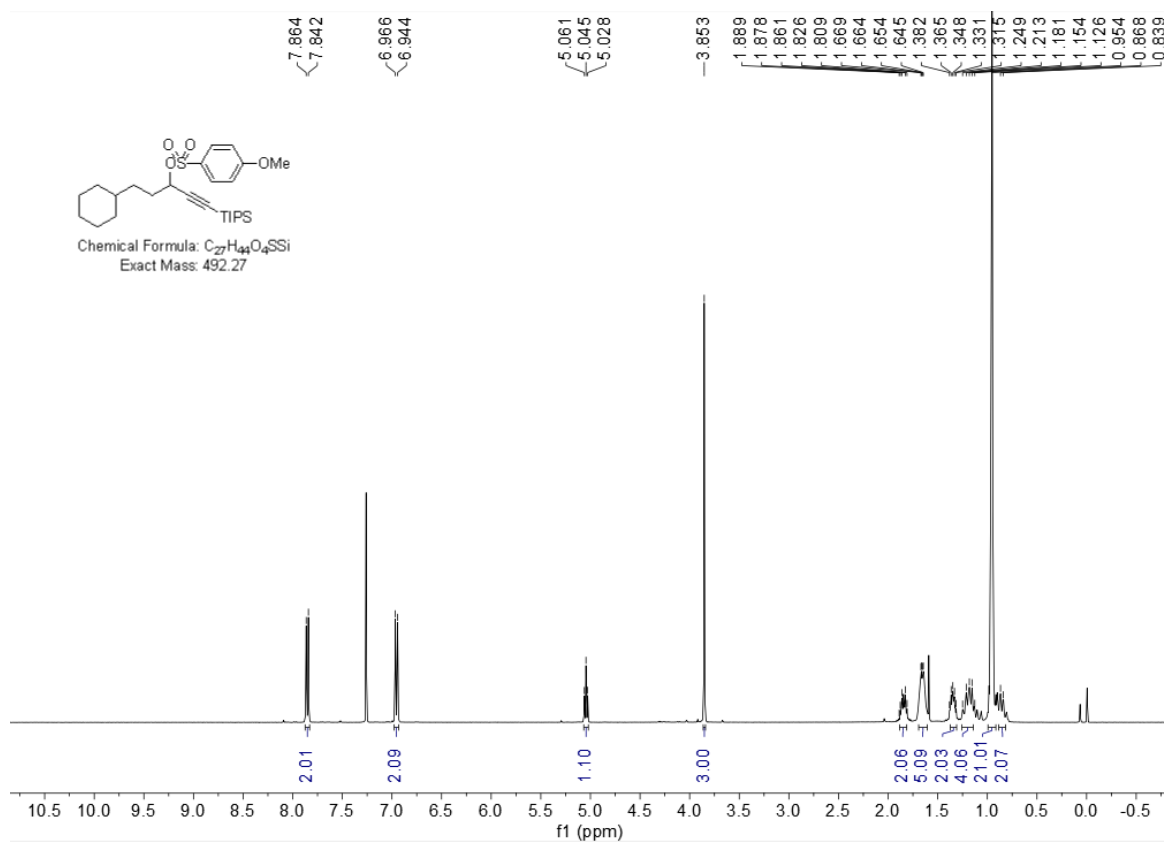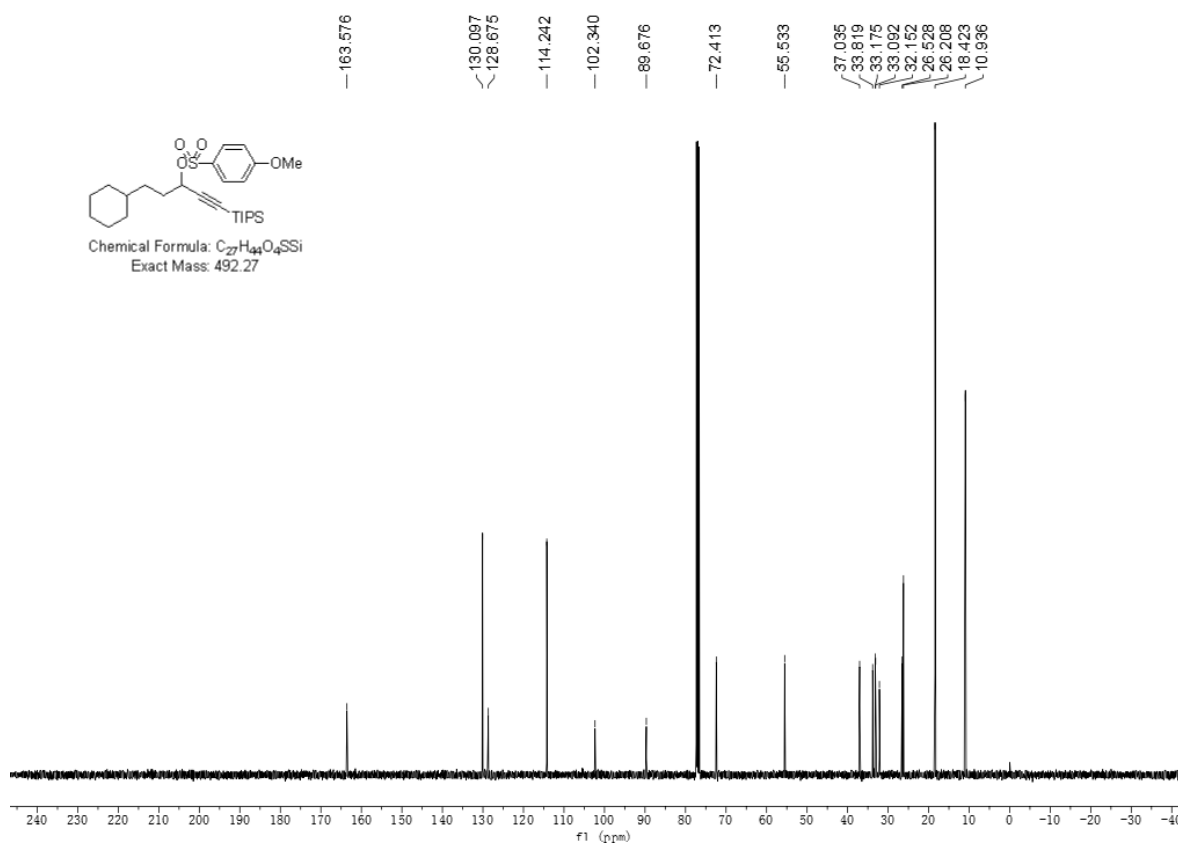



# 5-Methyl-1-(triisopropylsilyl)hex-1-yn-3-yl 4-methoxybenzenesulfonate (1e)

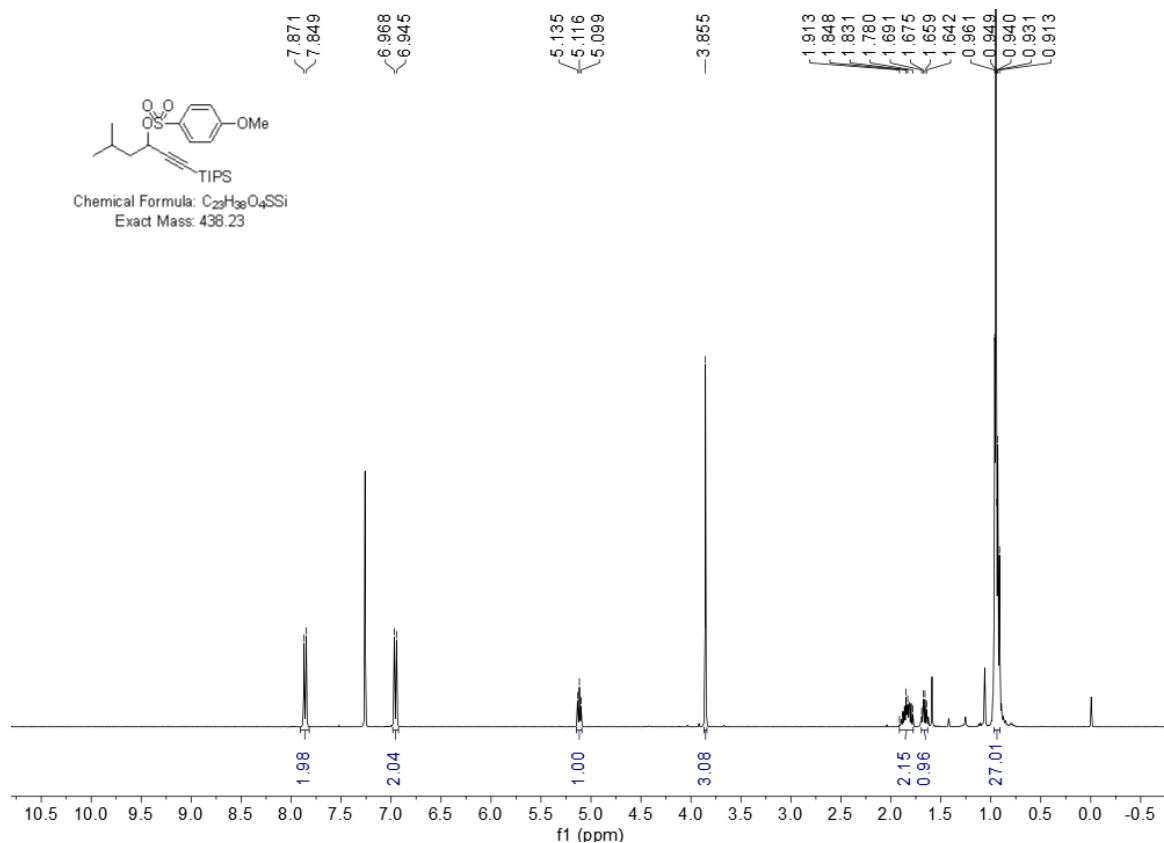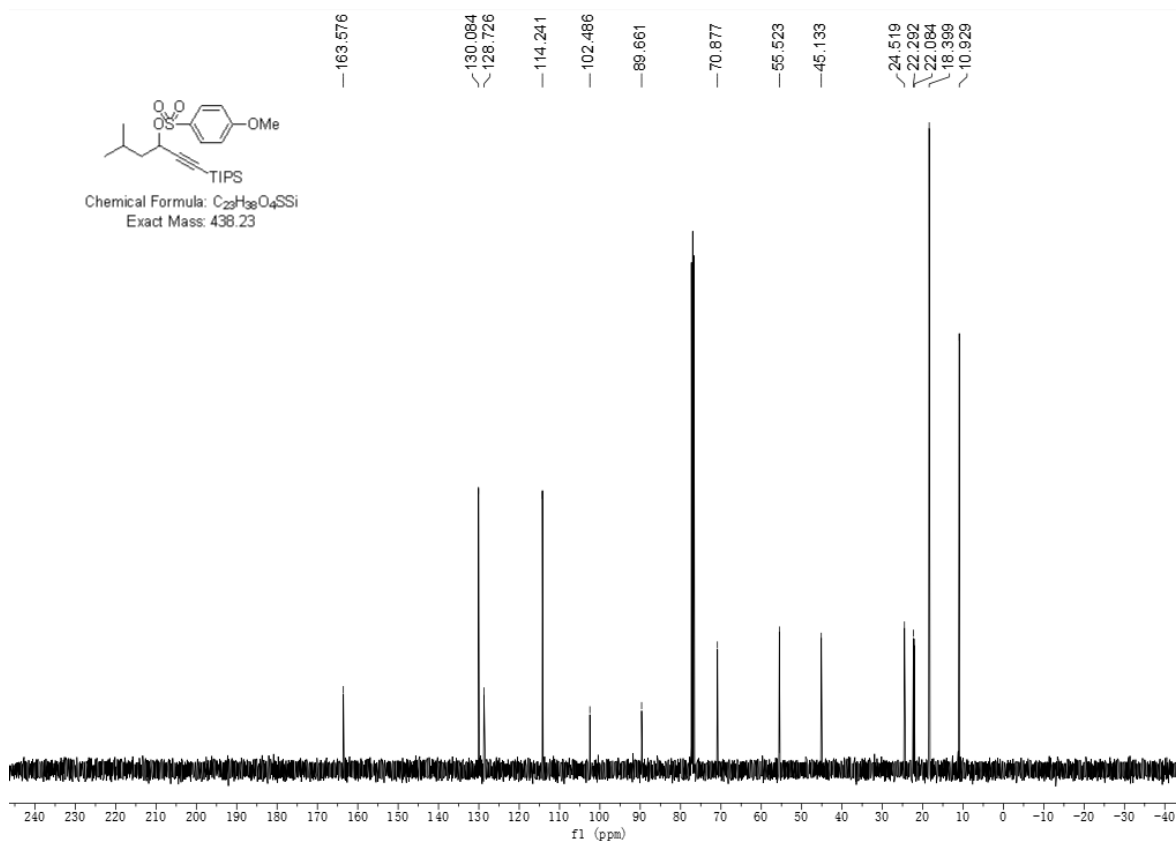

# 5,9-Dimethyl-1-(triisopropylsilyl)dec-8-en-1-yn-3-yl 4-methoxybenzenesulfonate (1f)

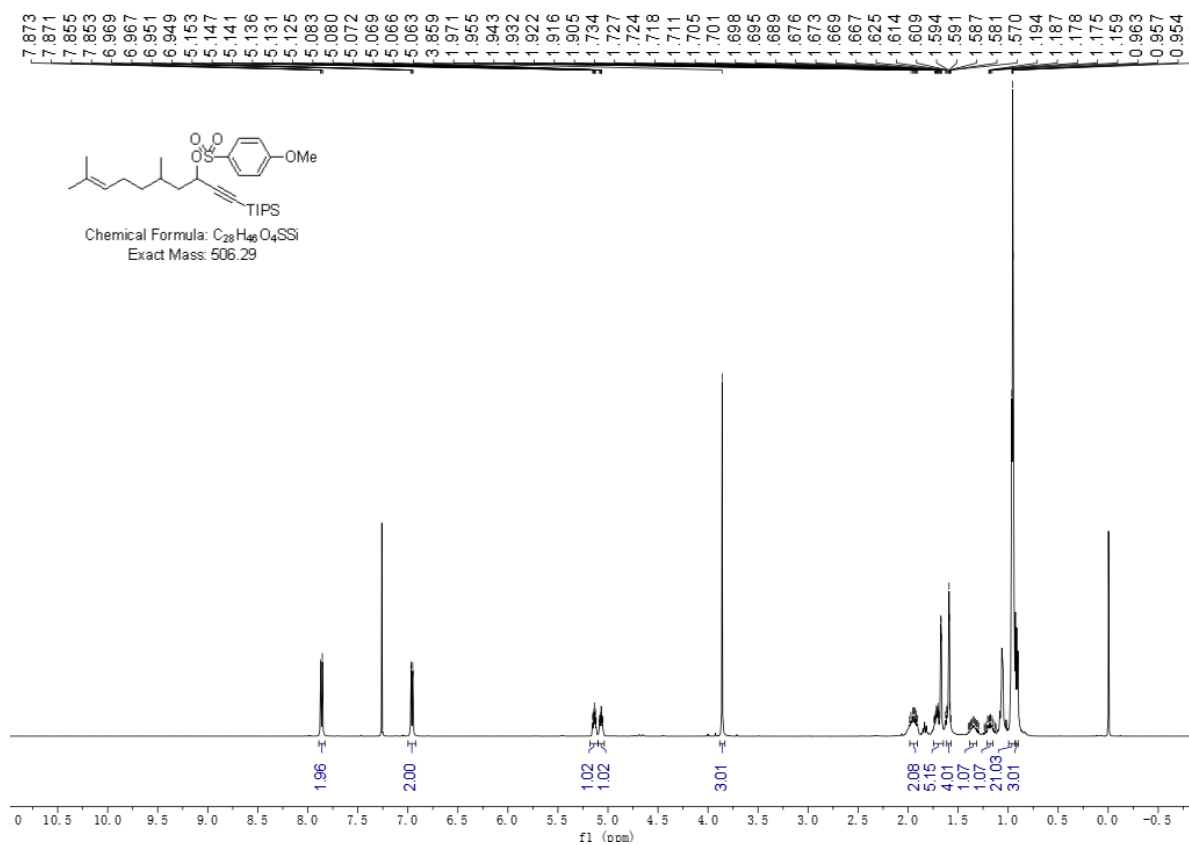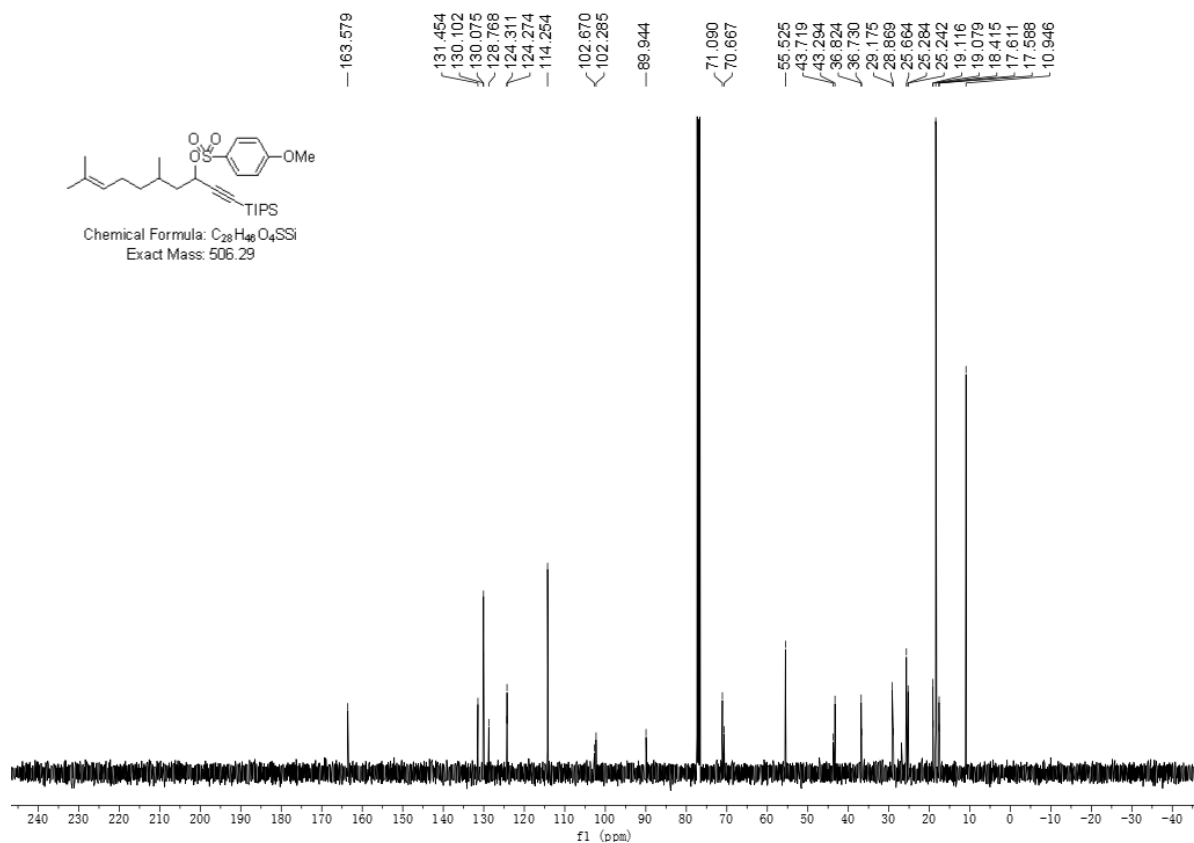

# (Z)-1-(Triisopropylsilyl)non-6-en-1-yn-3-yl 4-methoxybenzenesulfonate (1g)

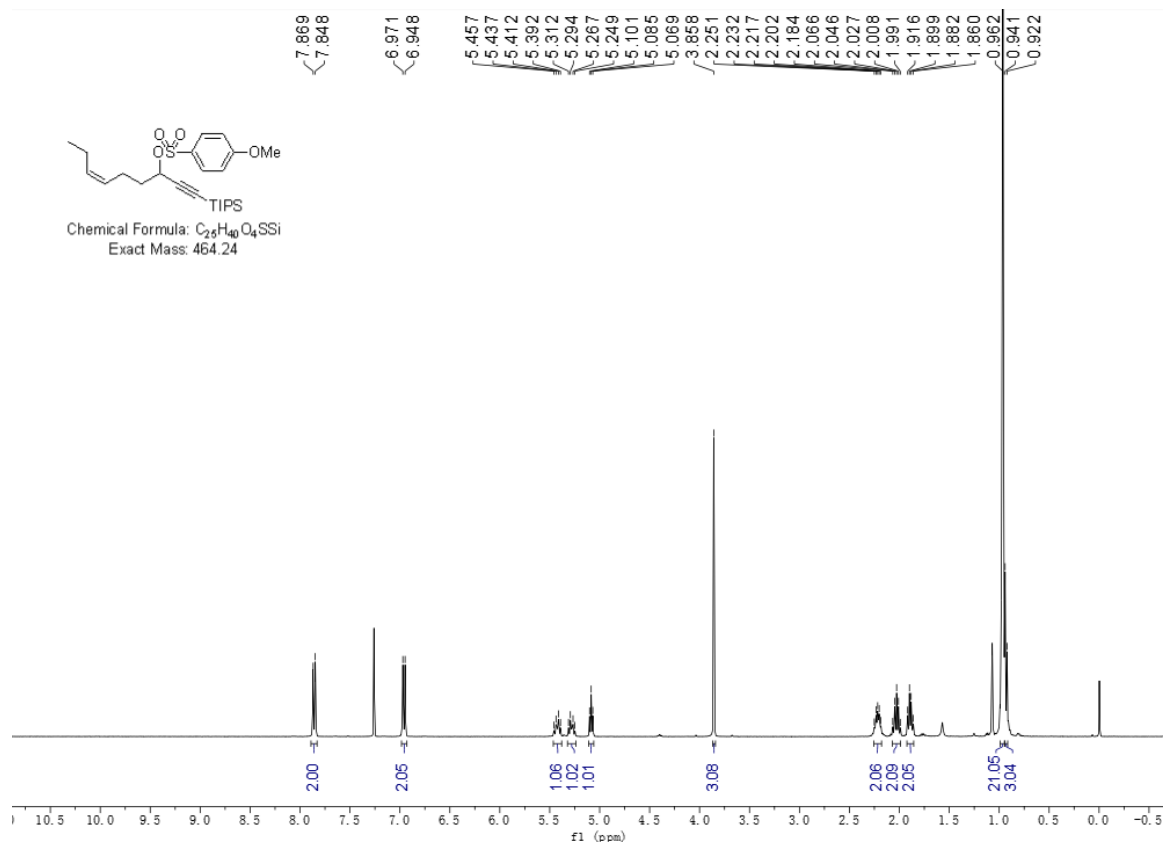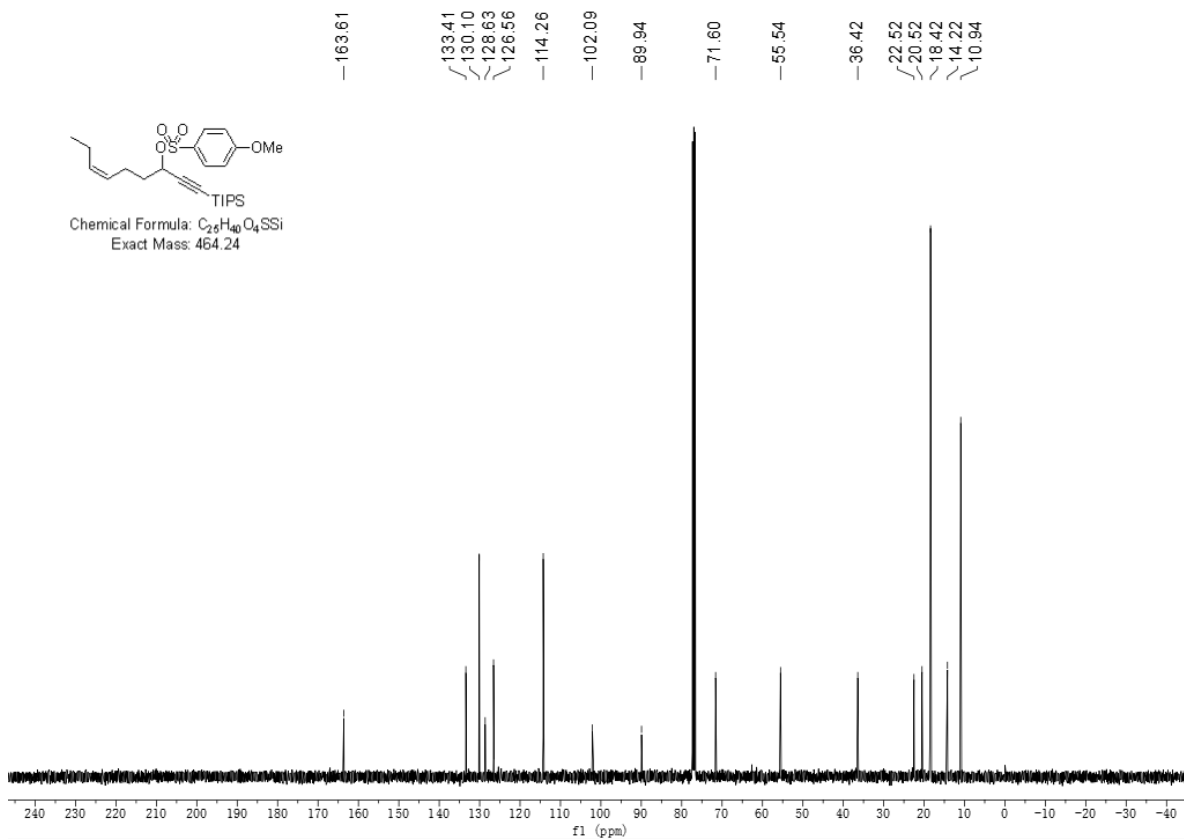

**7-((*tert*-Butyldimethylsilyl)oxy)-1-(triisopropylsilyl)hept-1-yn-3-yl 4-methoxybenzenesulfonate (1h)**

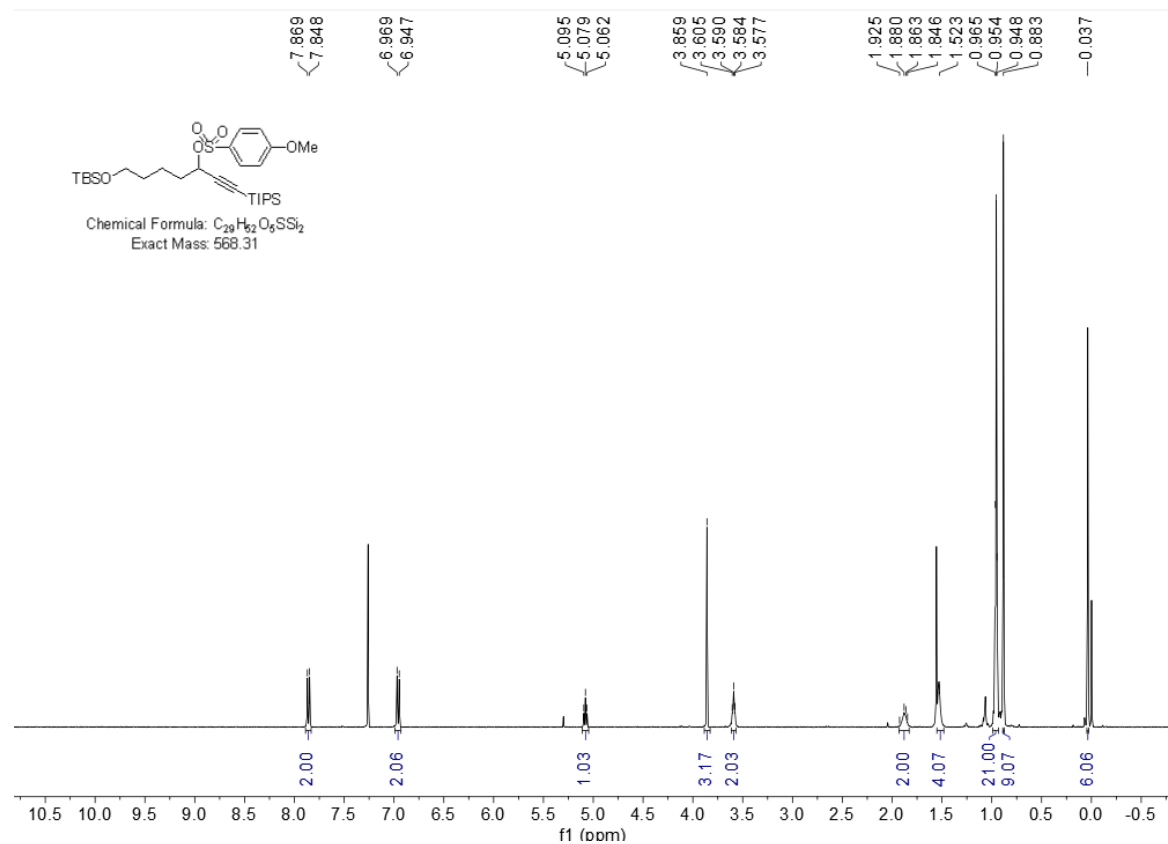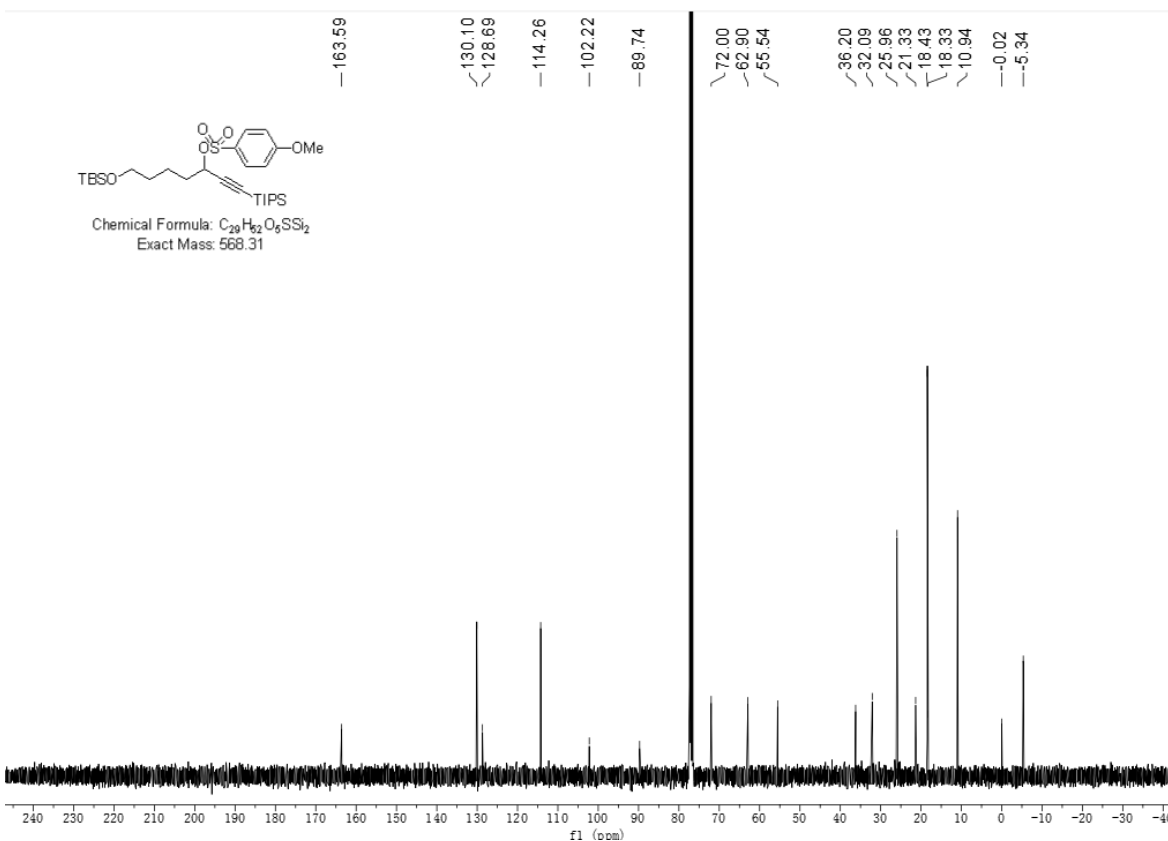

# 1-(Benzyloxy)-4-(triisopropylsilyl)but-3-yn-2-yl 4-methoxybenzenesulfonate (1i)

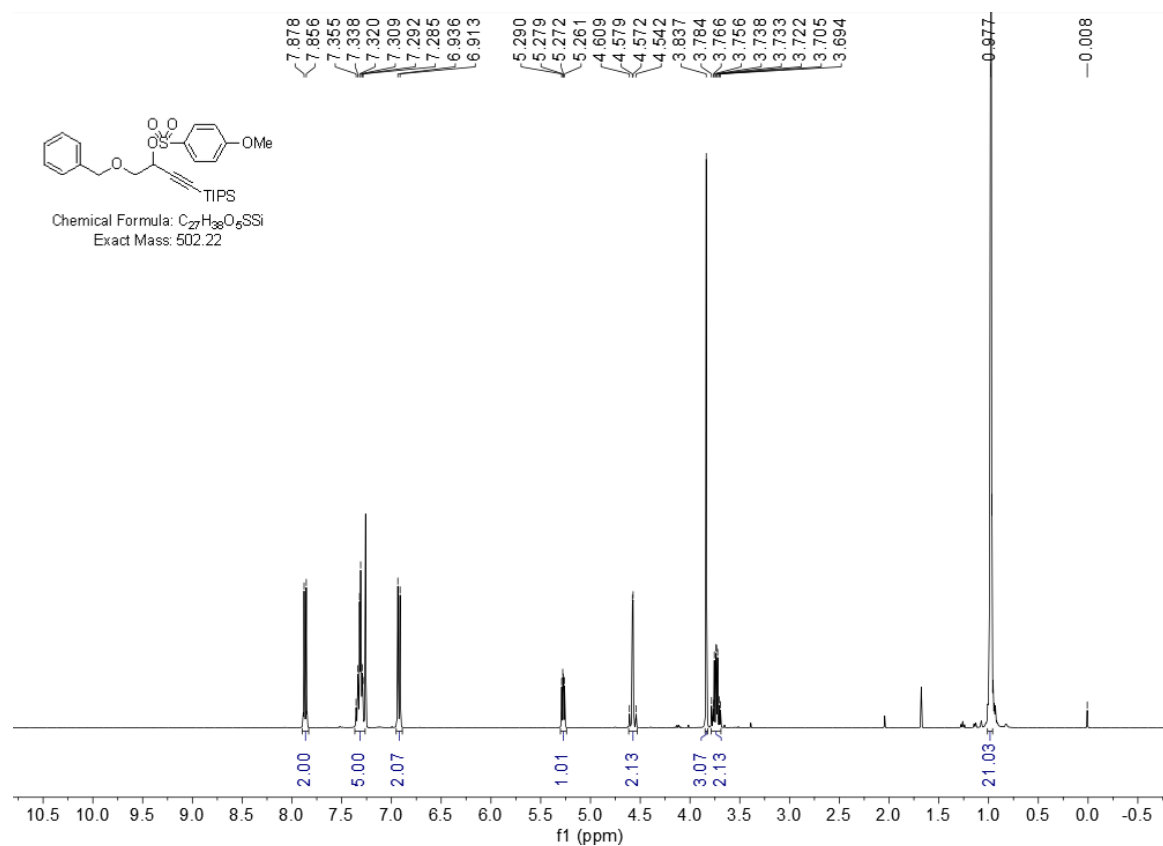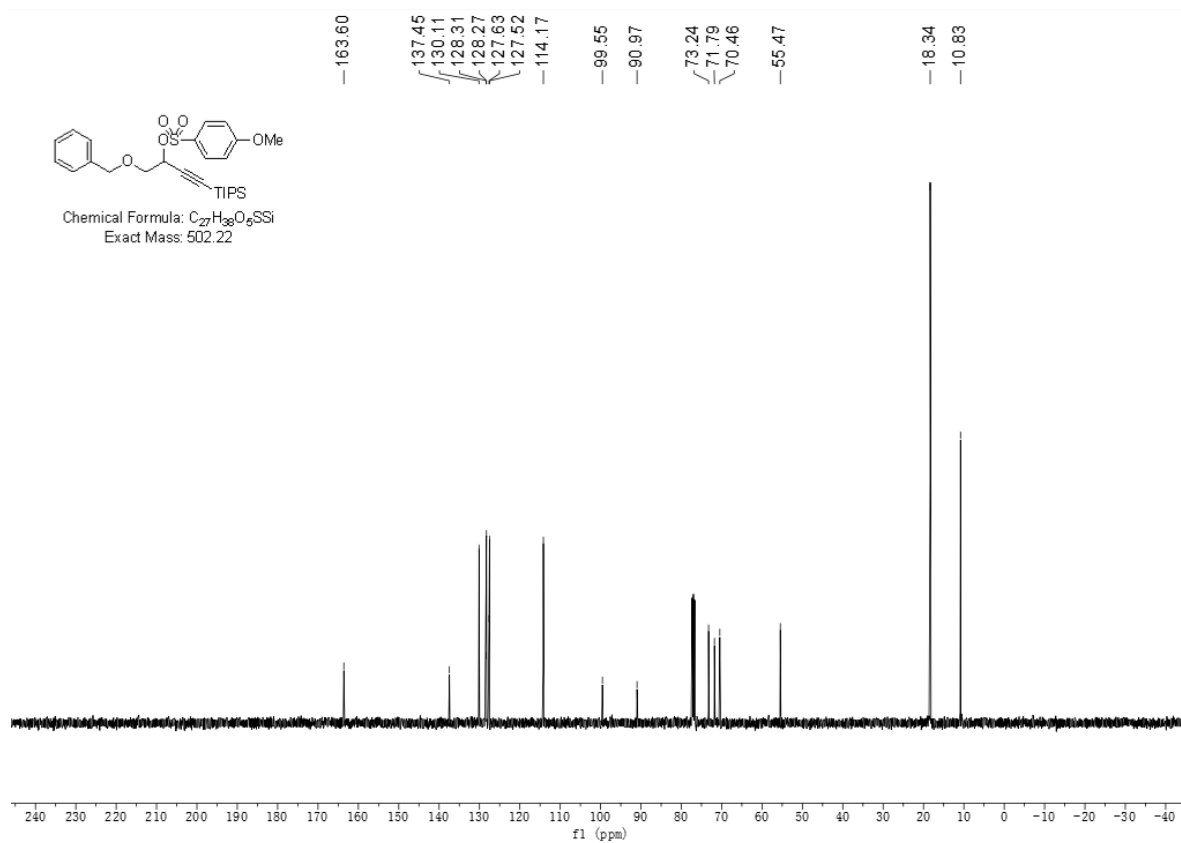

# 7-Hydroxy-1-(triisopropylsilyl)hept-1-yn-3-yl 4-methoxybenzenesulfonate (1j)

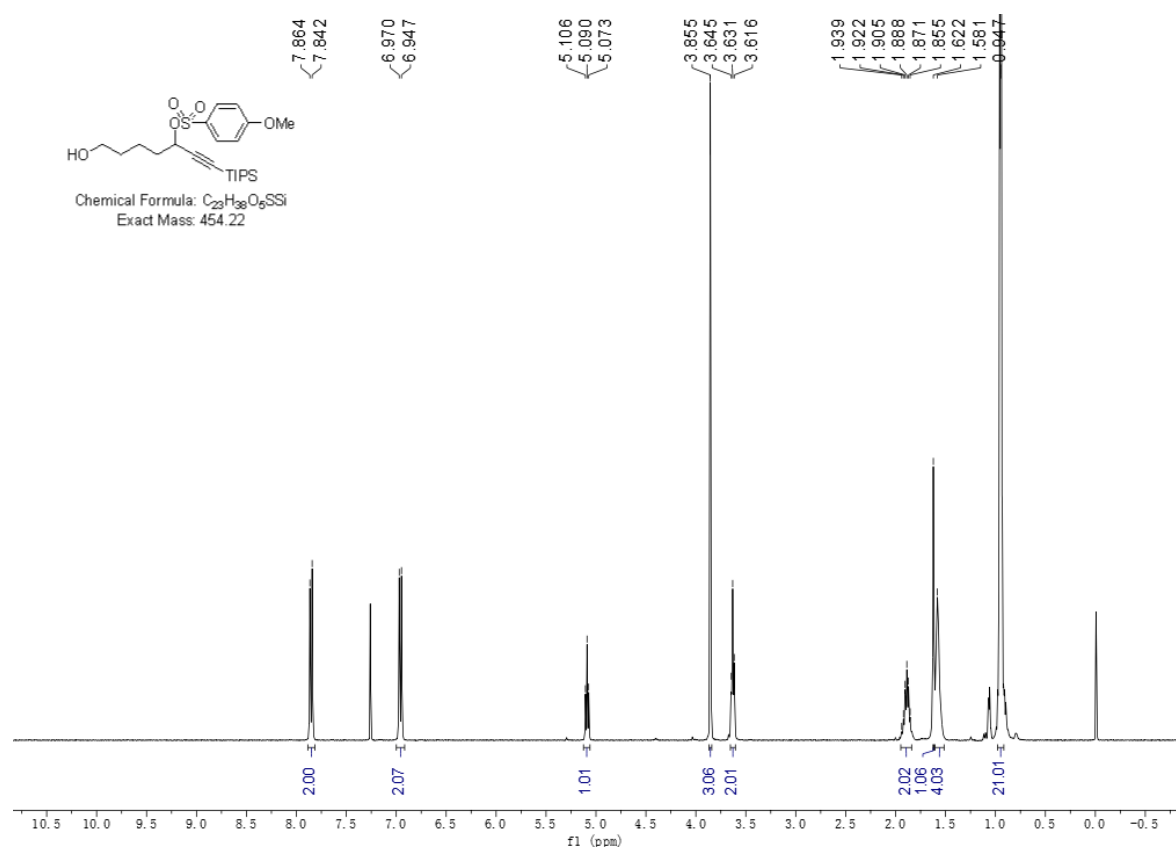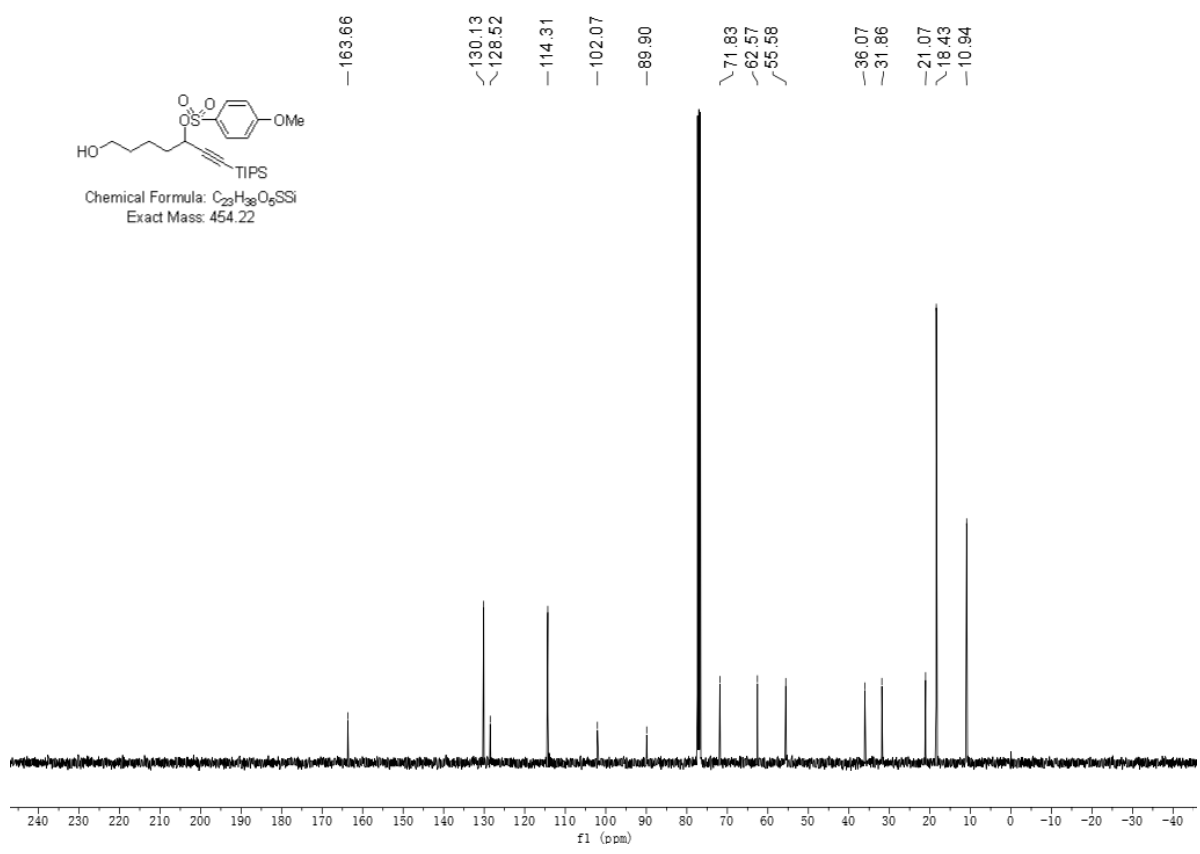

**1-(*tert*-Butyl) 4-(5-(((4-methoxyphenyl)sulfonyl)oxy)-7-(triisopropylsilyl)hept-6-yn-1-yl) piperidine-1,4-dicarboxylate (1k)**

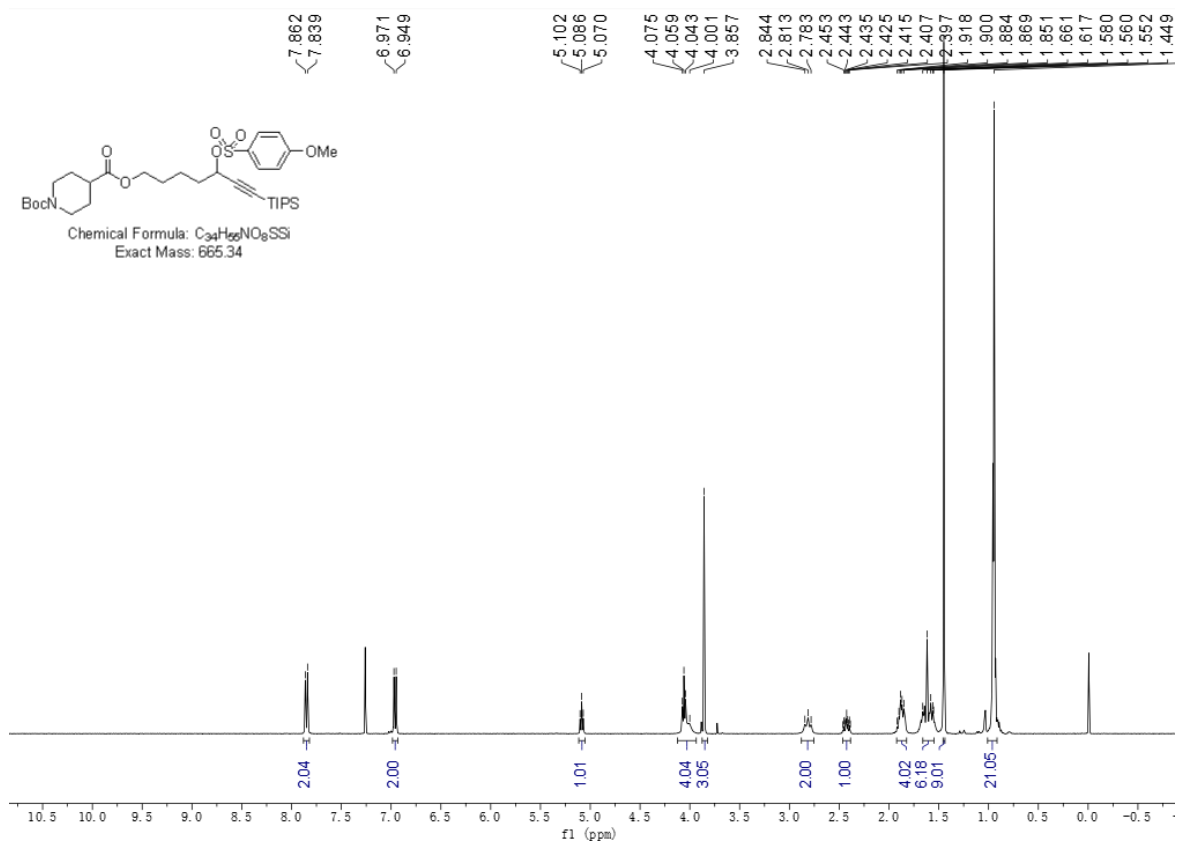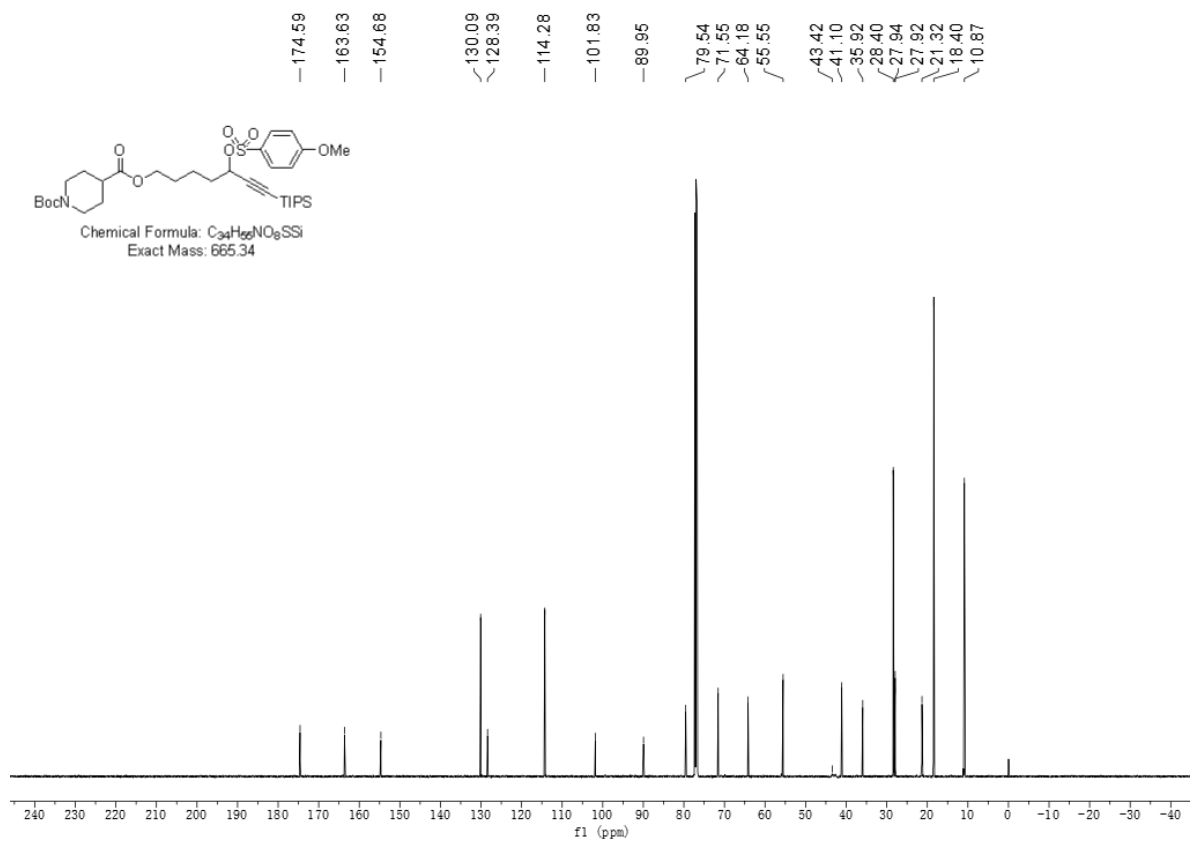

**1-(((4-Methoxyphenyl)sulfonyl)oxy)-7-(triisopropylsilyl)hept-6-yn-1-yl 4-nitrobenzoate (11)**

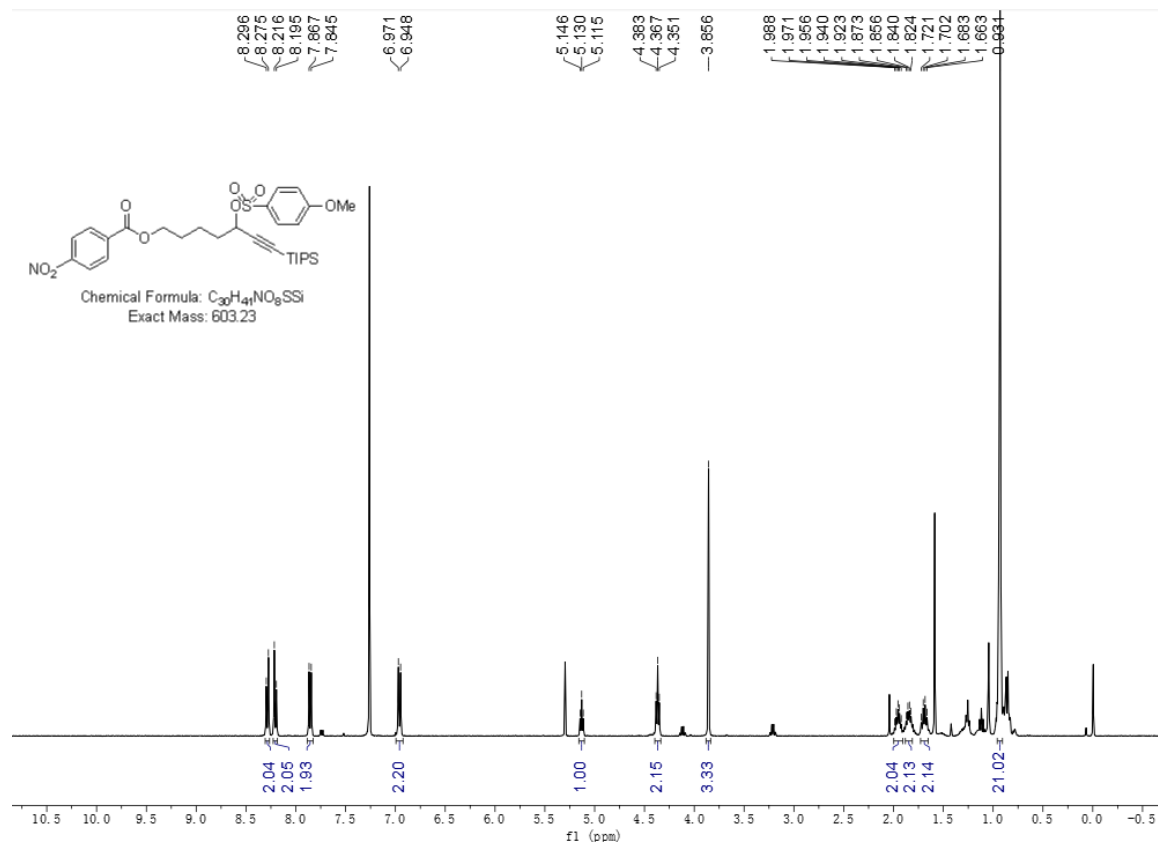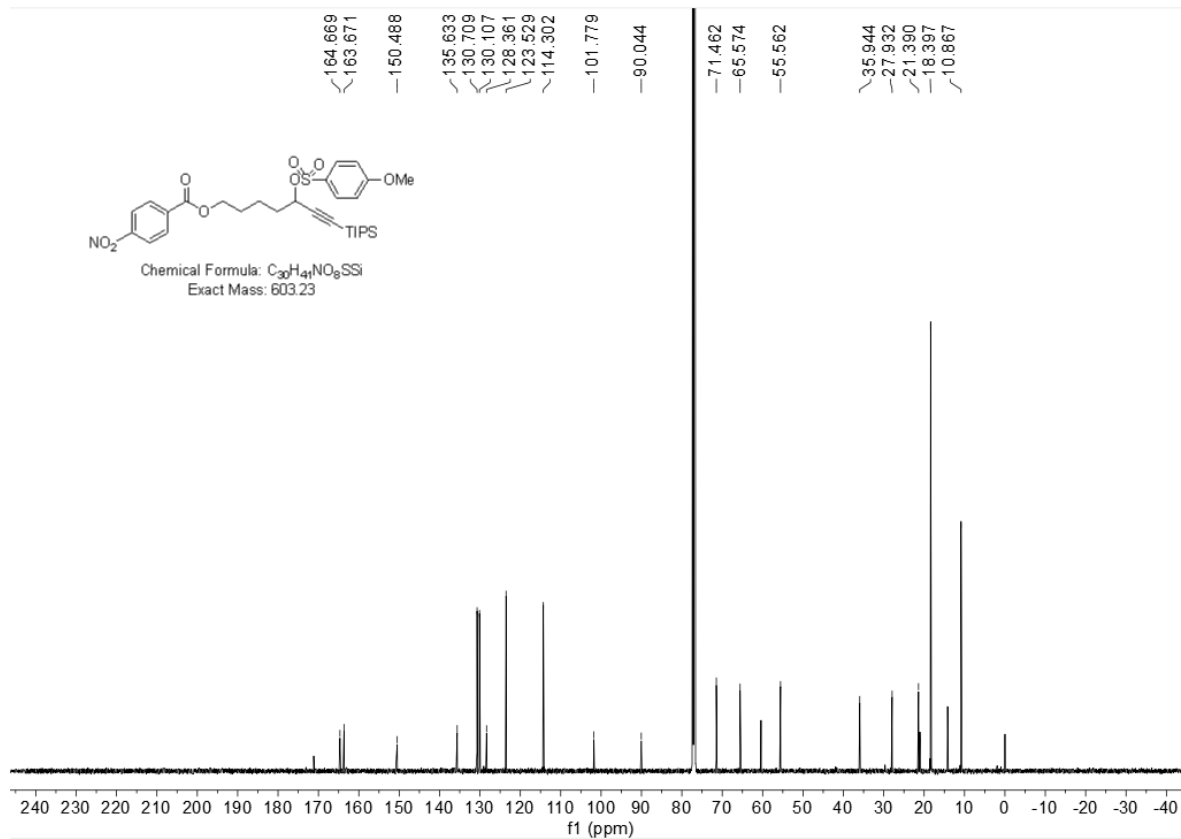



# 5-(((4-Methoxyphenyl)sulfonyl)oxy)-7-(triisopropylsilyl)hept-6-yn-1-yl 4-cyanobenzoate (1m)

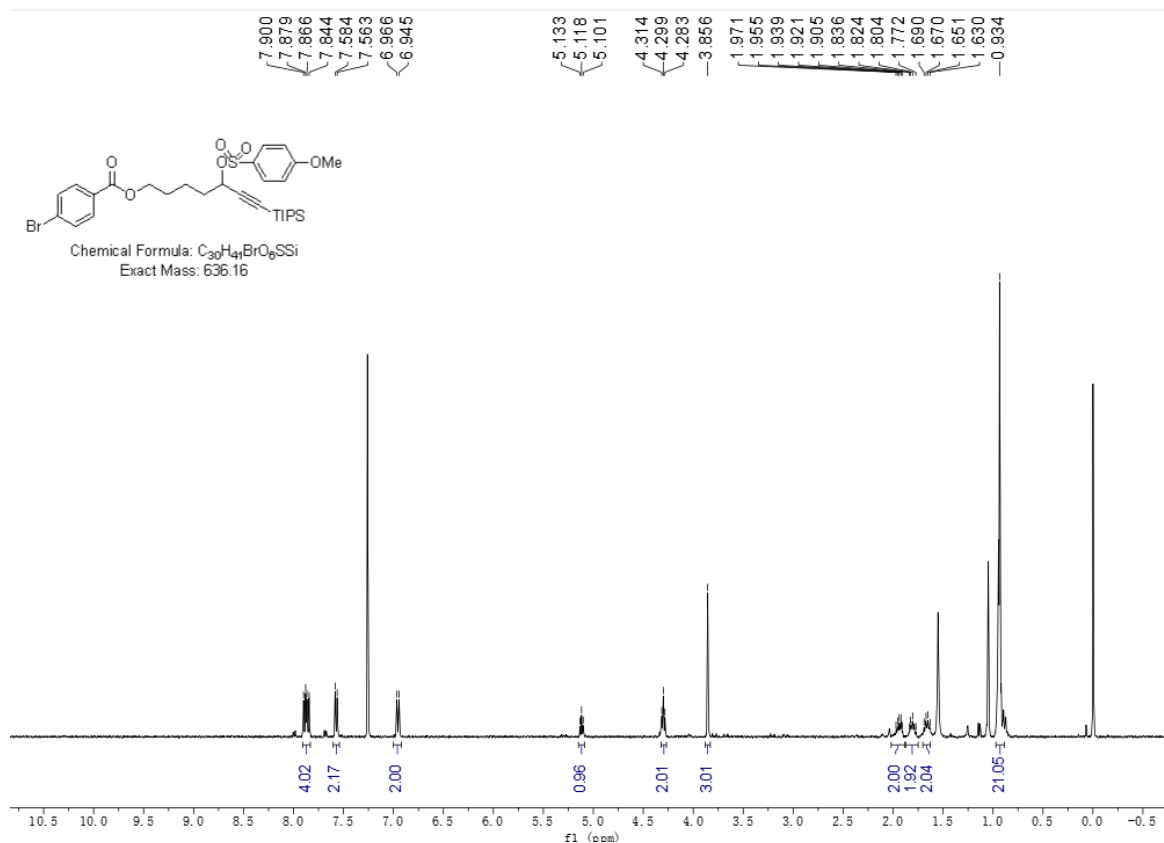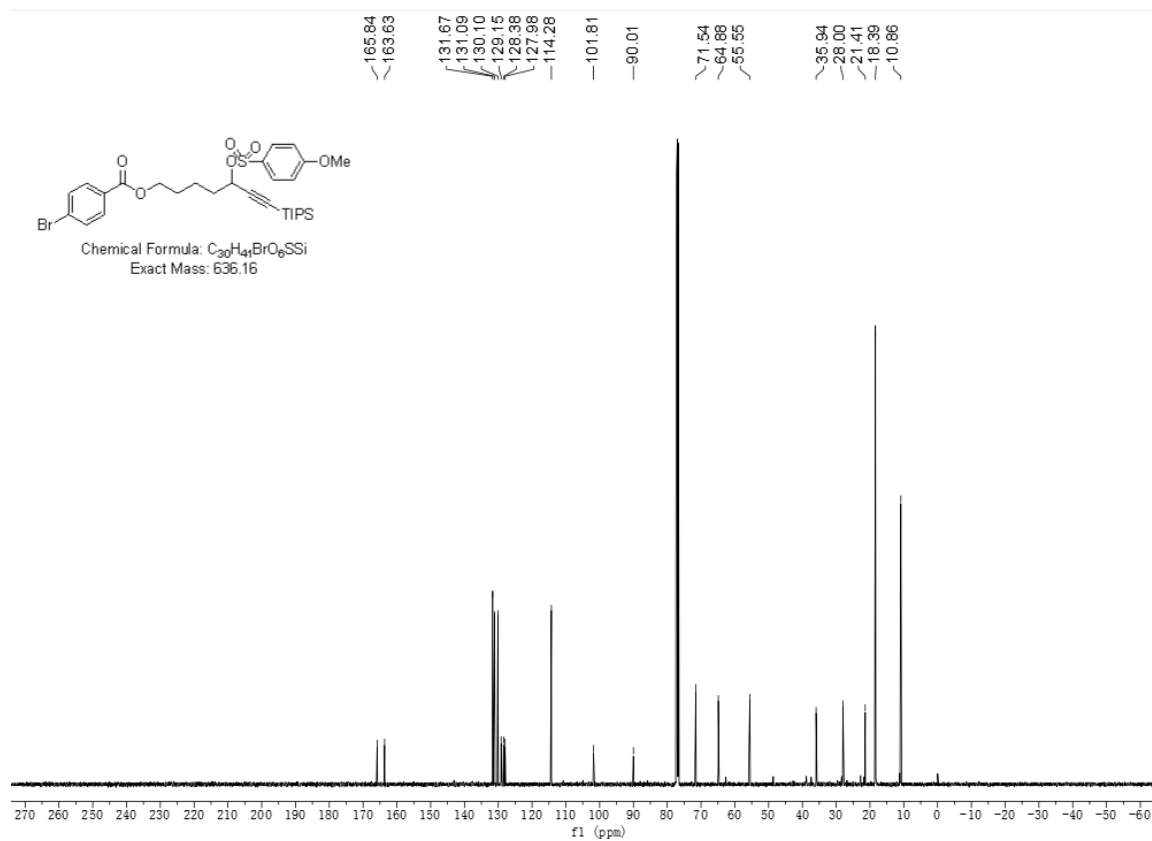

# 7-Chloro-1-(triisopropylsilyl)hept-1-yn-3-yl 4-methoxybenzenesulfonate (1n)

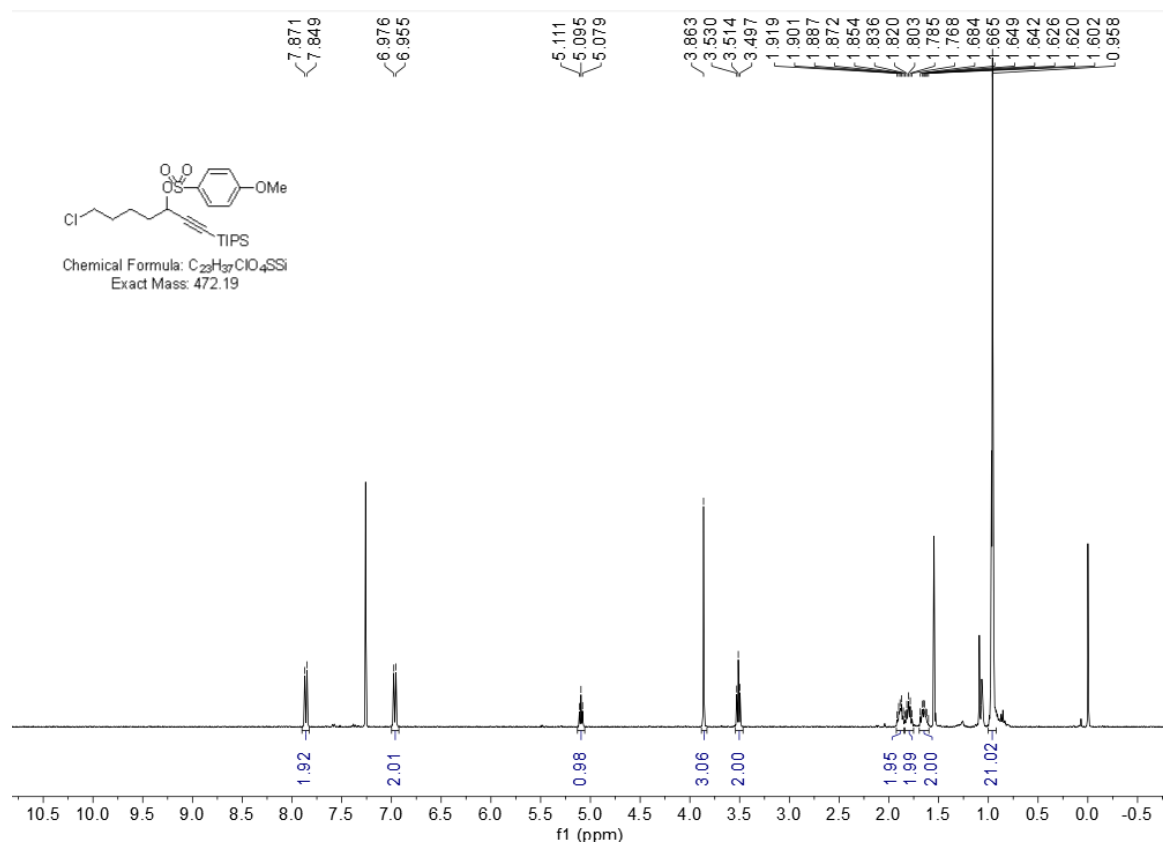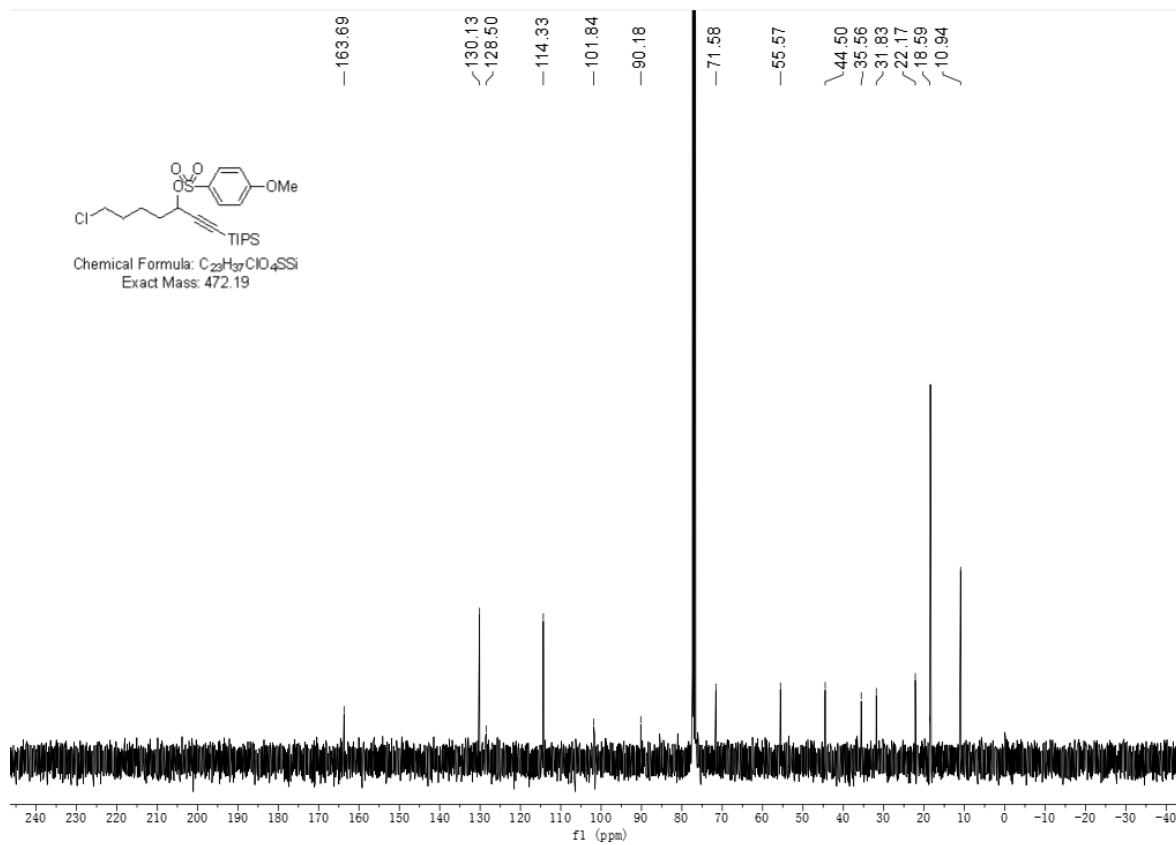

# 7-(Triisopropylsilyl)hept-6-yne-1,5-diyl bis(4-methoxybenzenesulfonate) (1o)

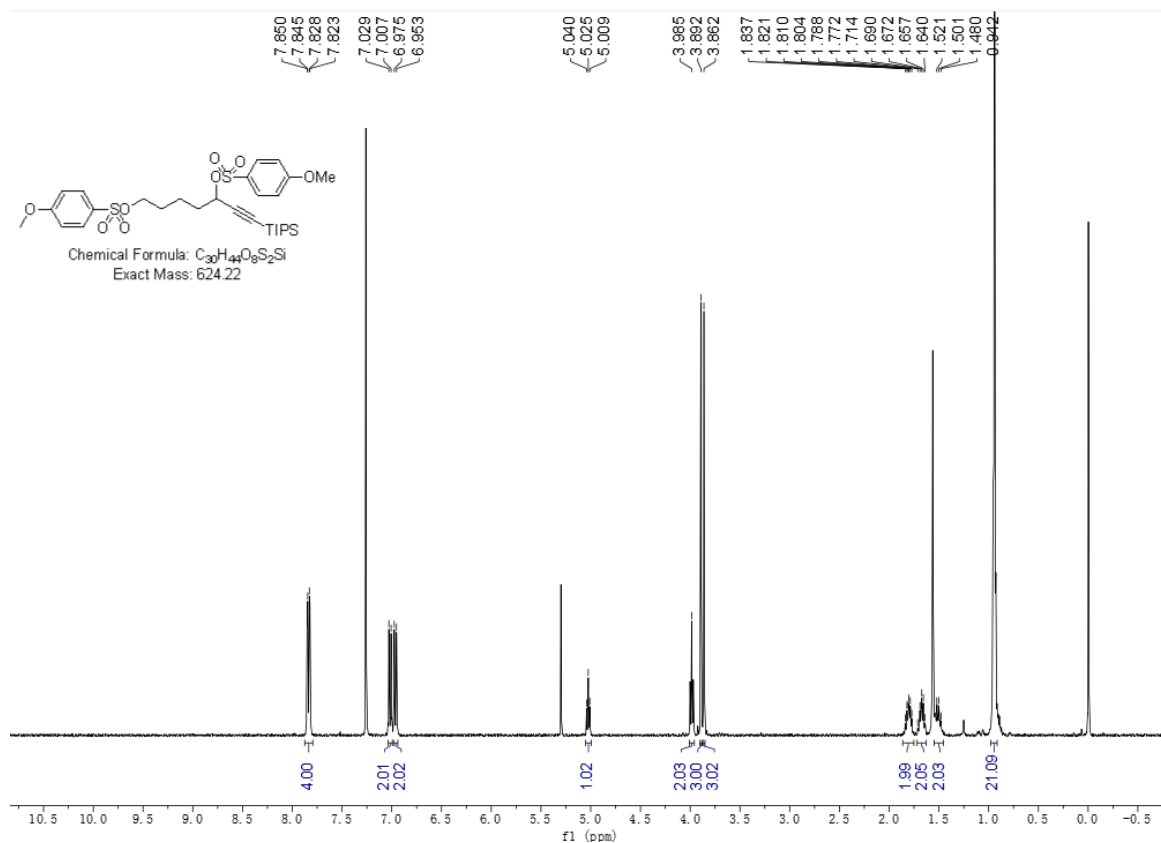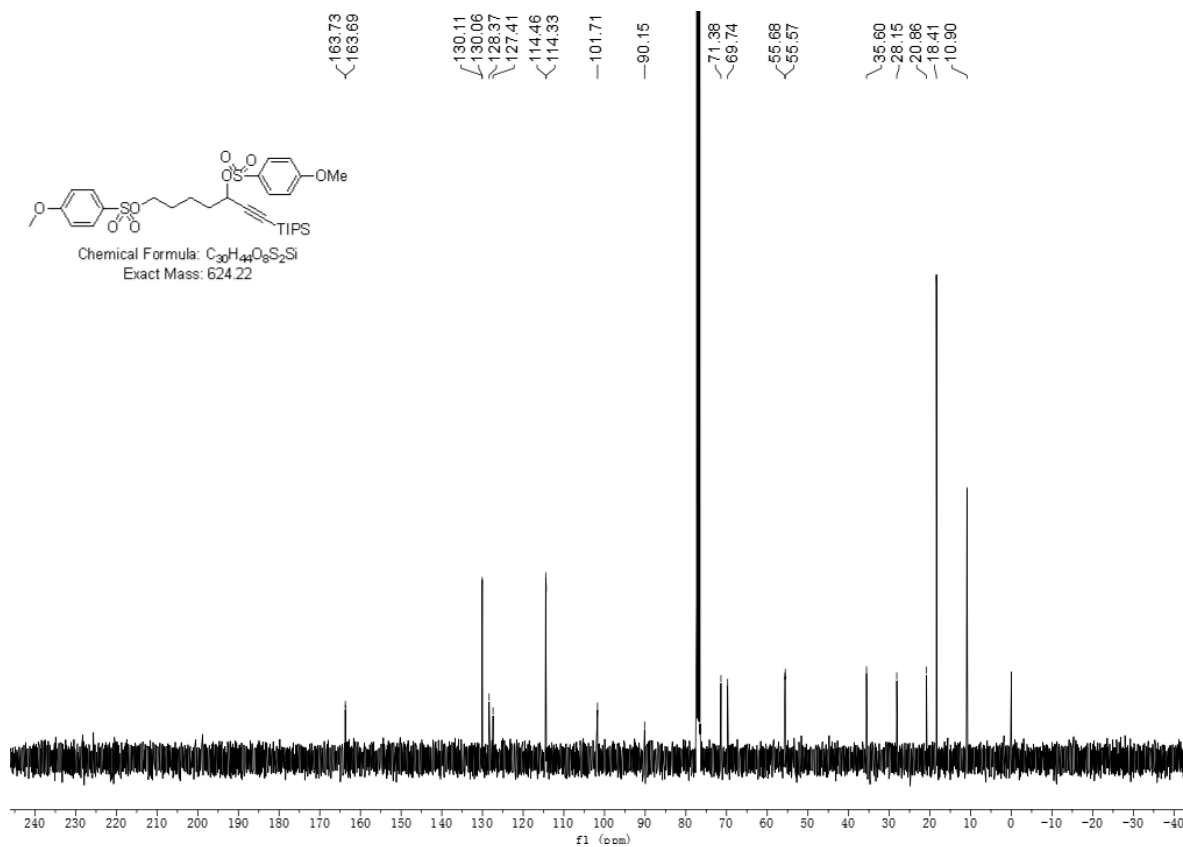

# 5-(5-Methylfuran-2-yl)-1-(triisopropylsilyl)pent-1-yn-3-yl 4-methoxybenzenesulfonate (1p)

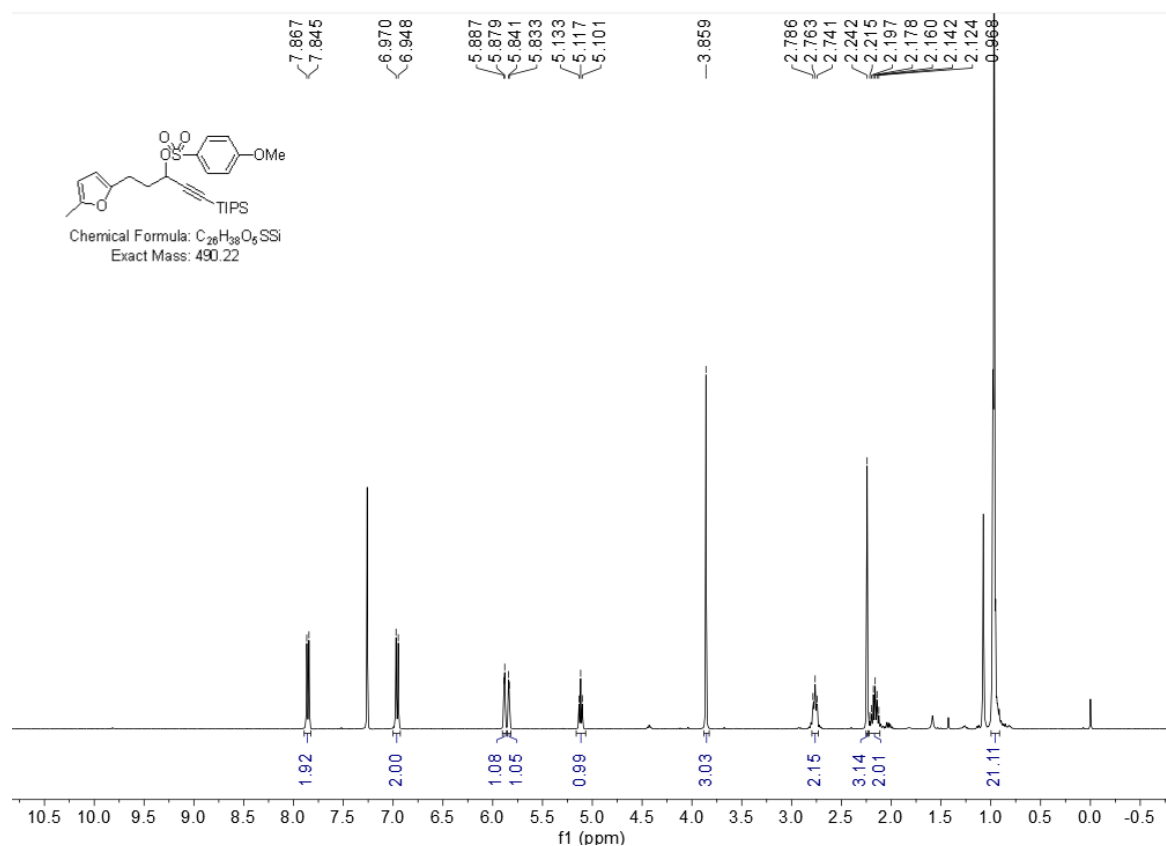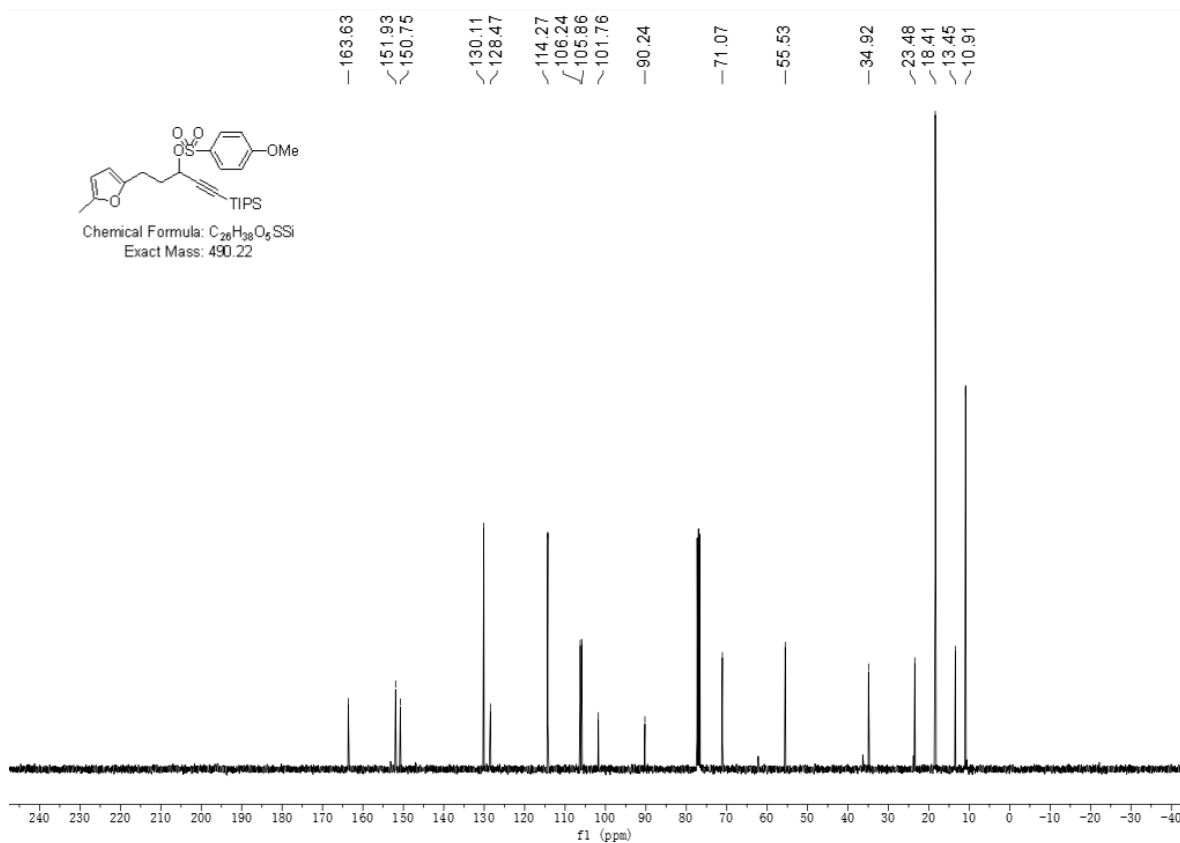

# 5-(((4-Methoxyphenyl)sulfonyl)oxy)-7-(triisopropylsilyl)hept-6-yn-1-yl 2-fluoroisonicotinate (1q)

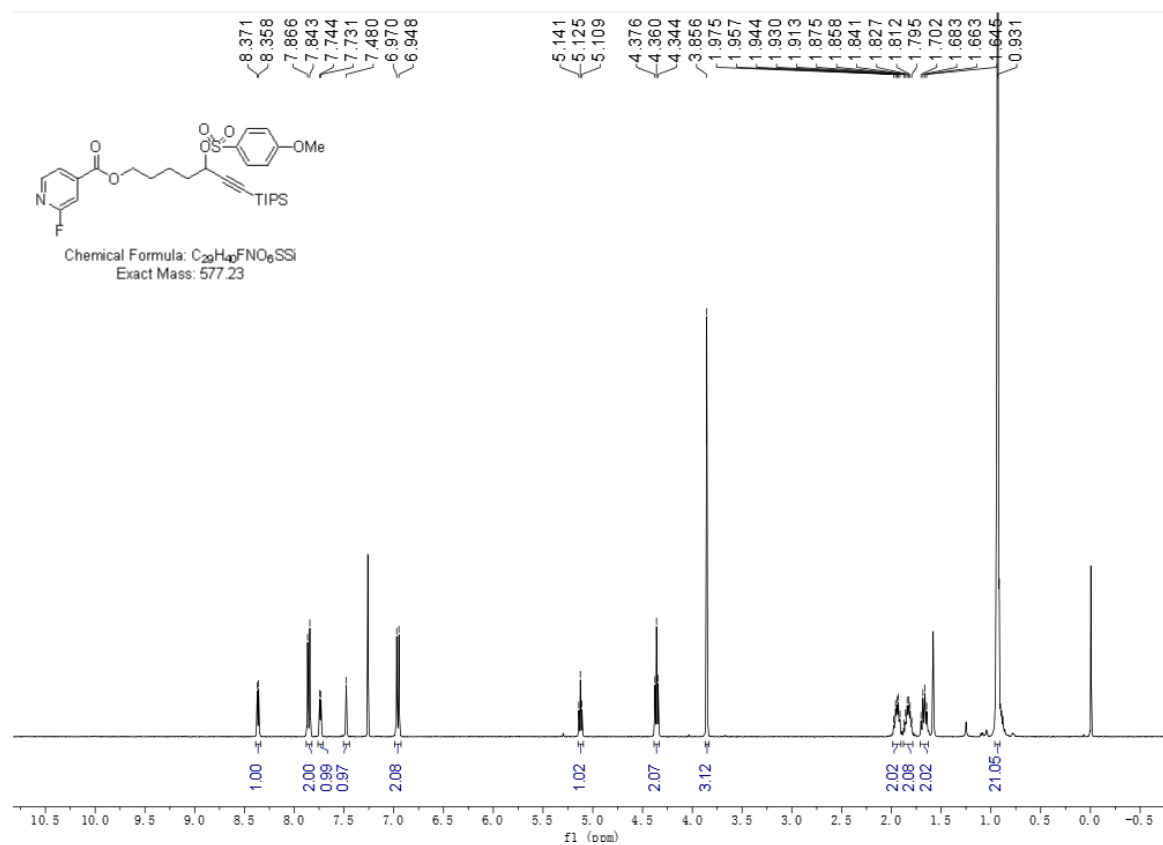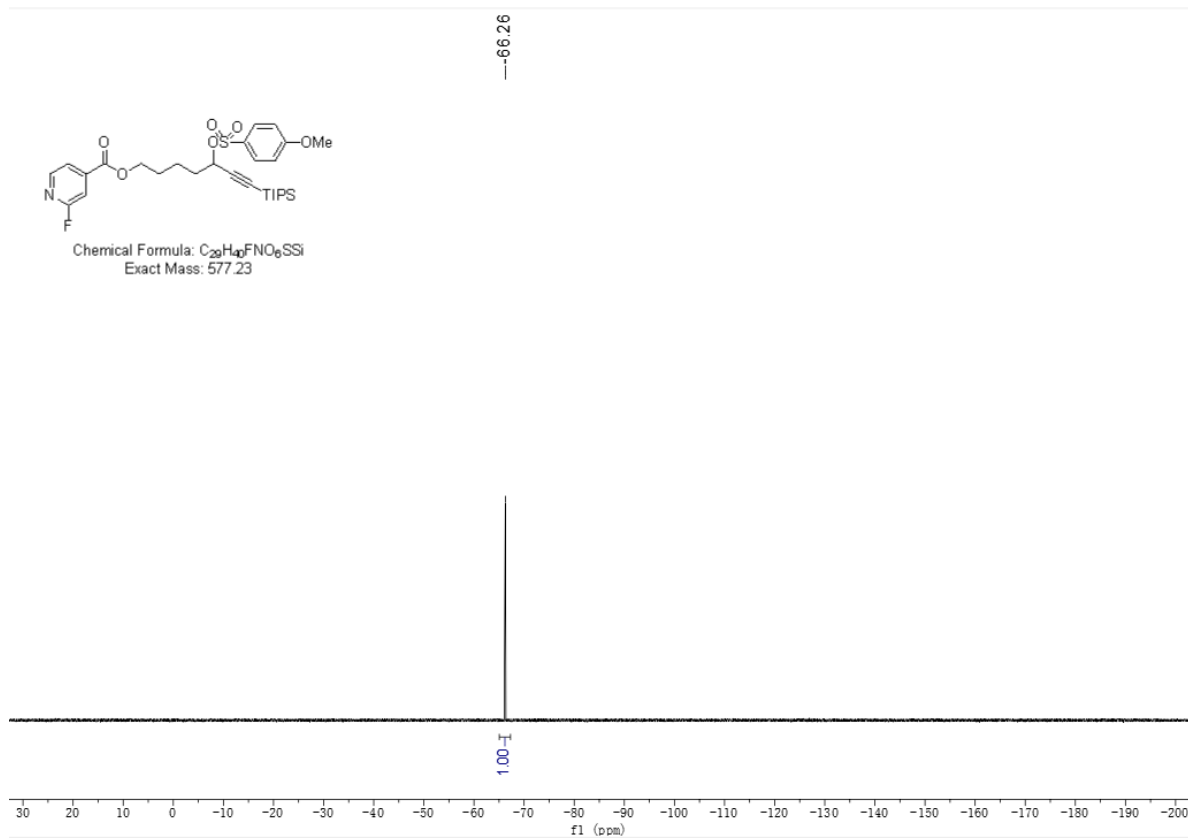

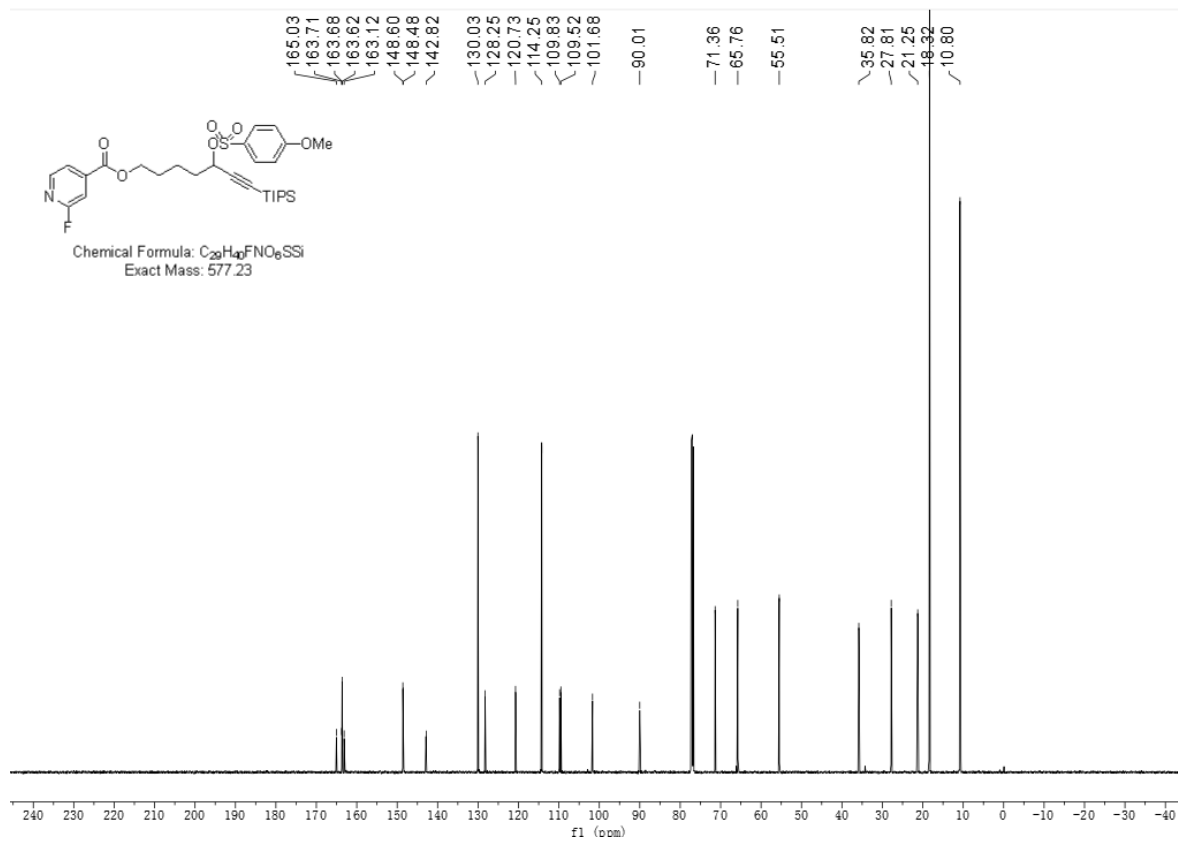

**(4,4-Difluoro-3-phenethylhex-5-en-1-yn-1-yl)triisopropylsilane (3a)**

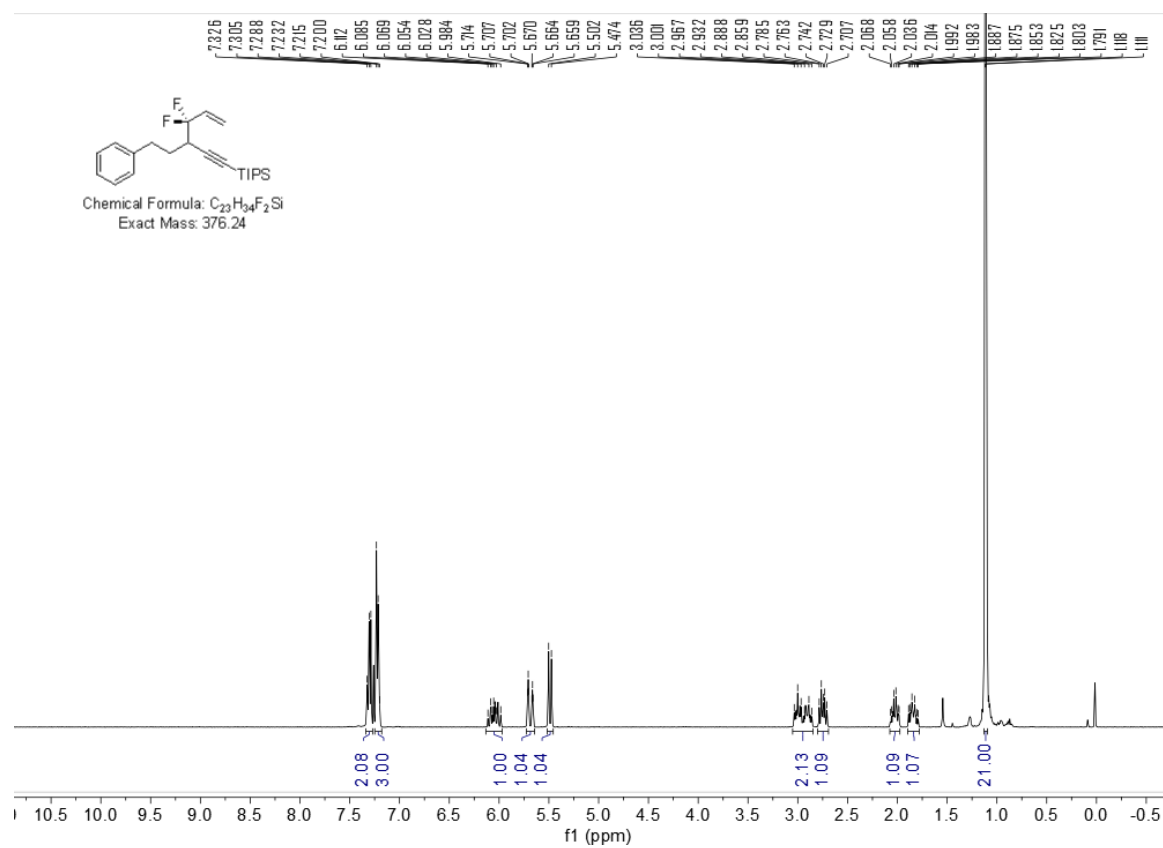

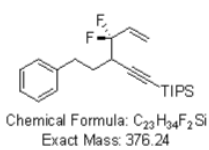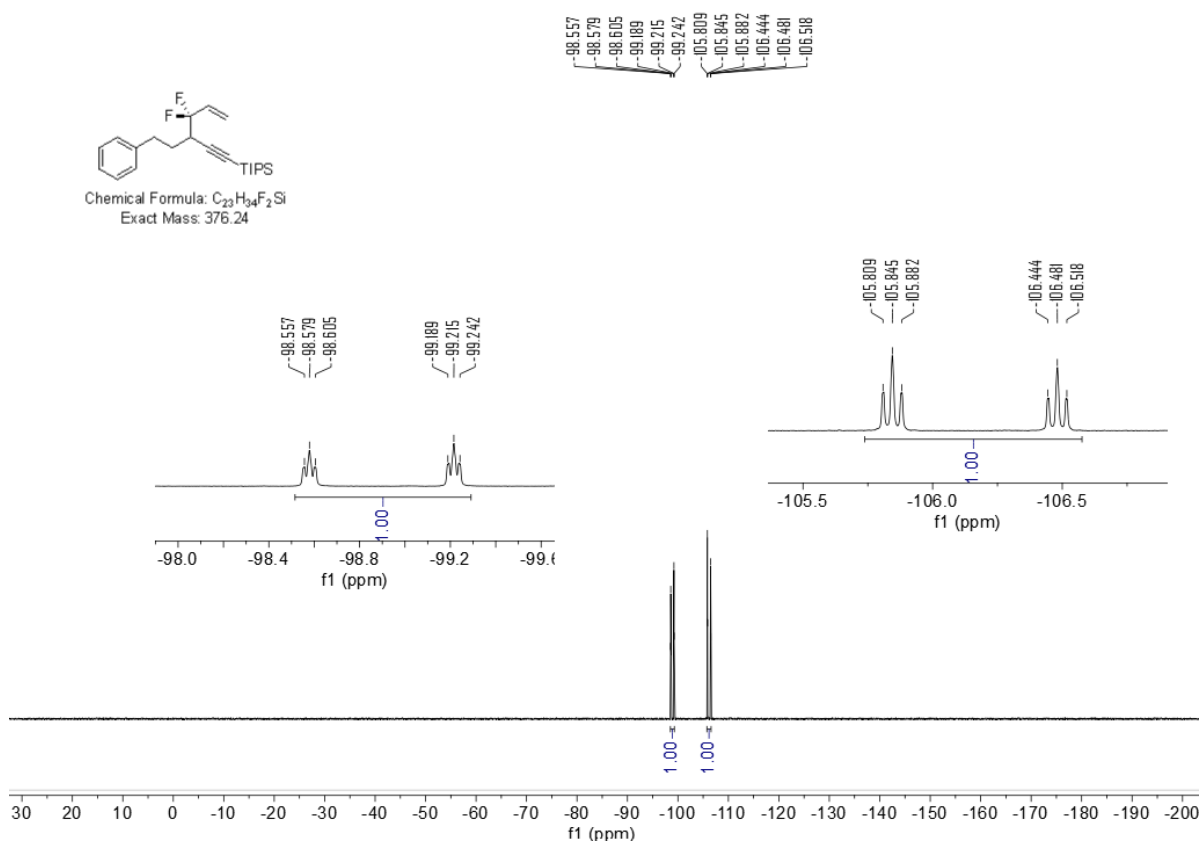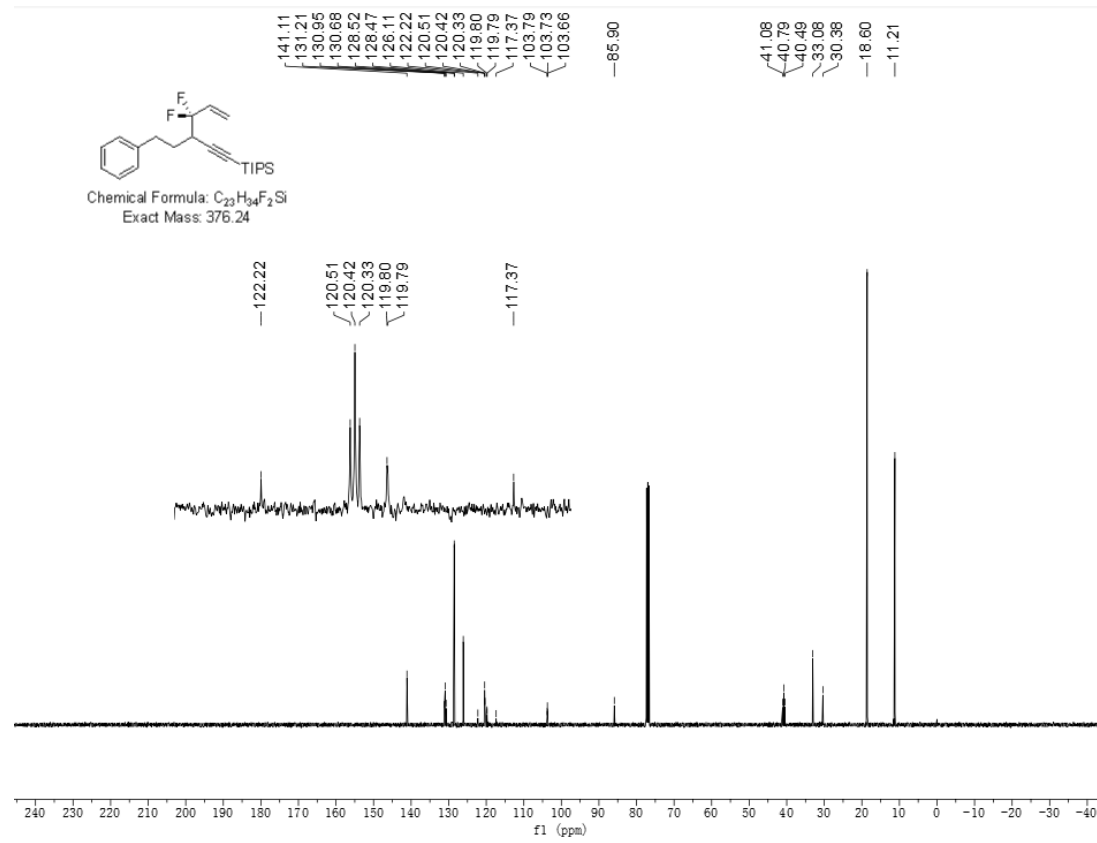

# Difluorohex-5-en-1-yn-1-yl)trisopropylsilane (3b)

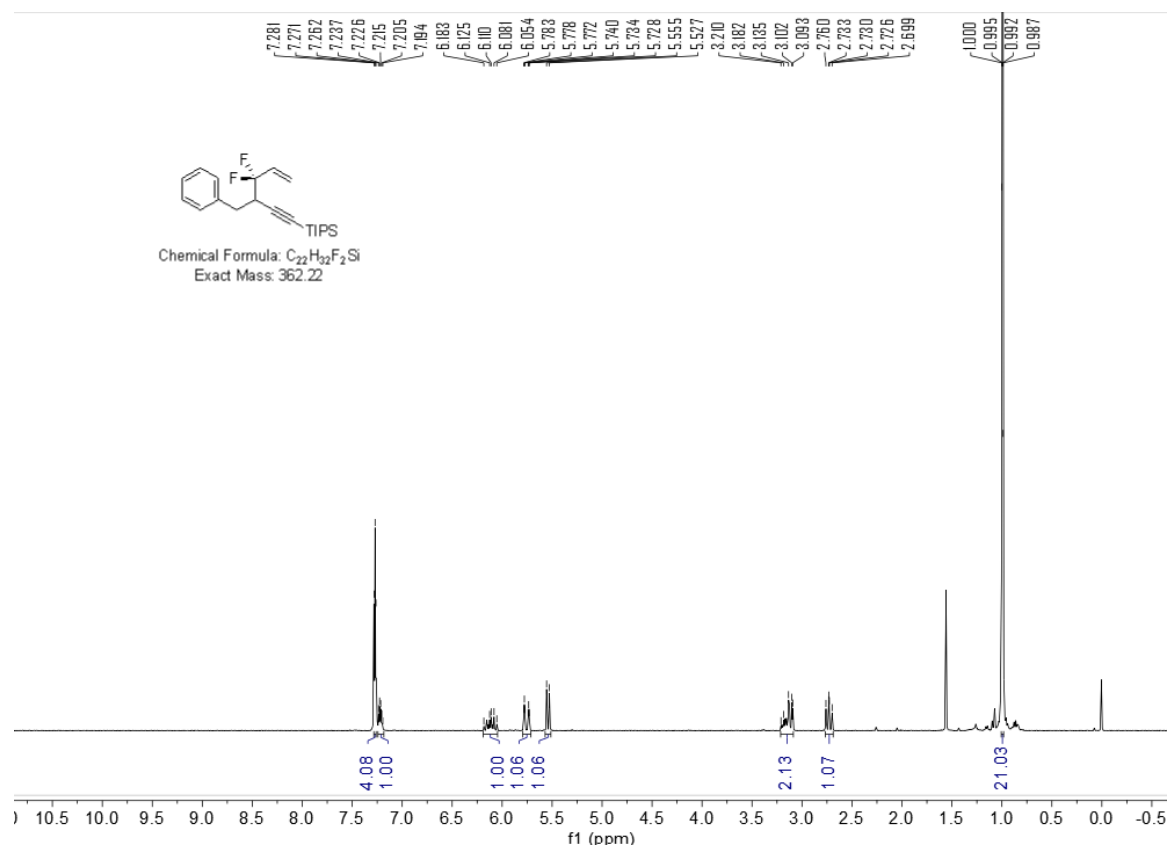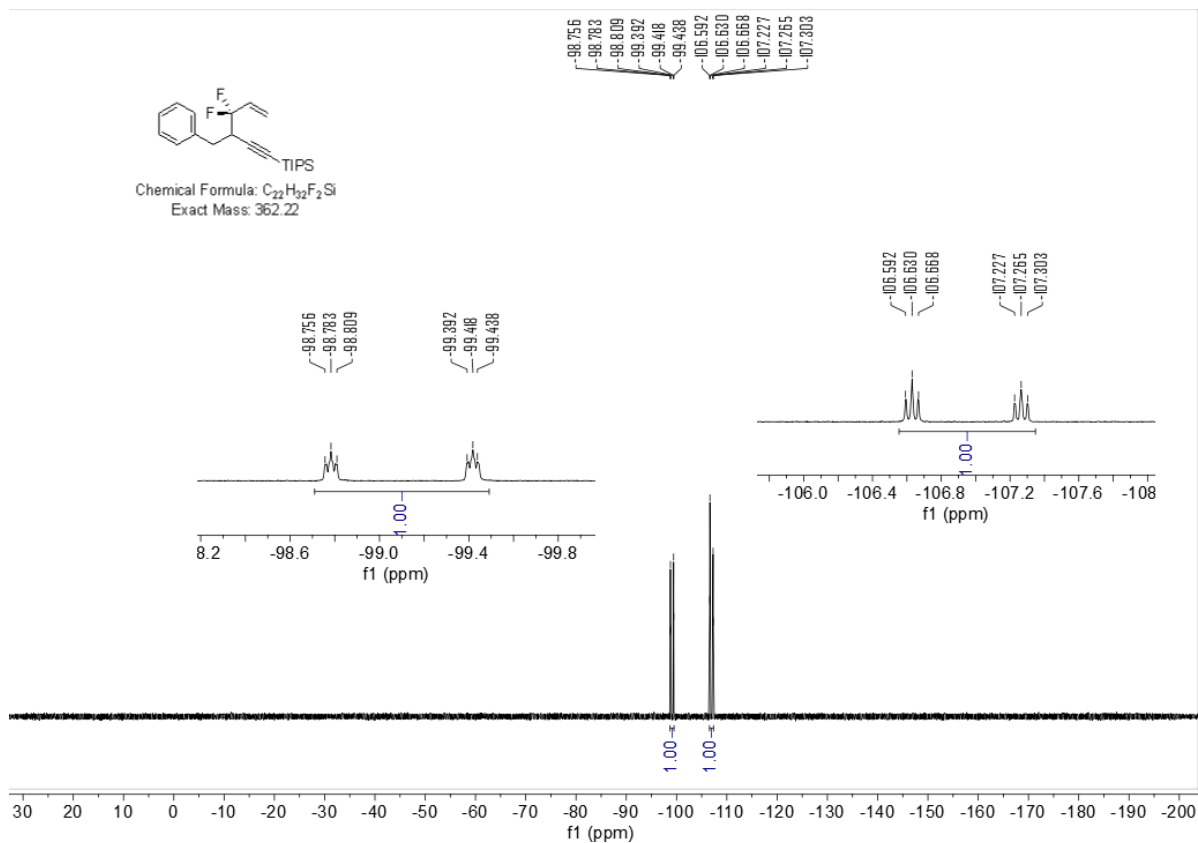



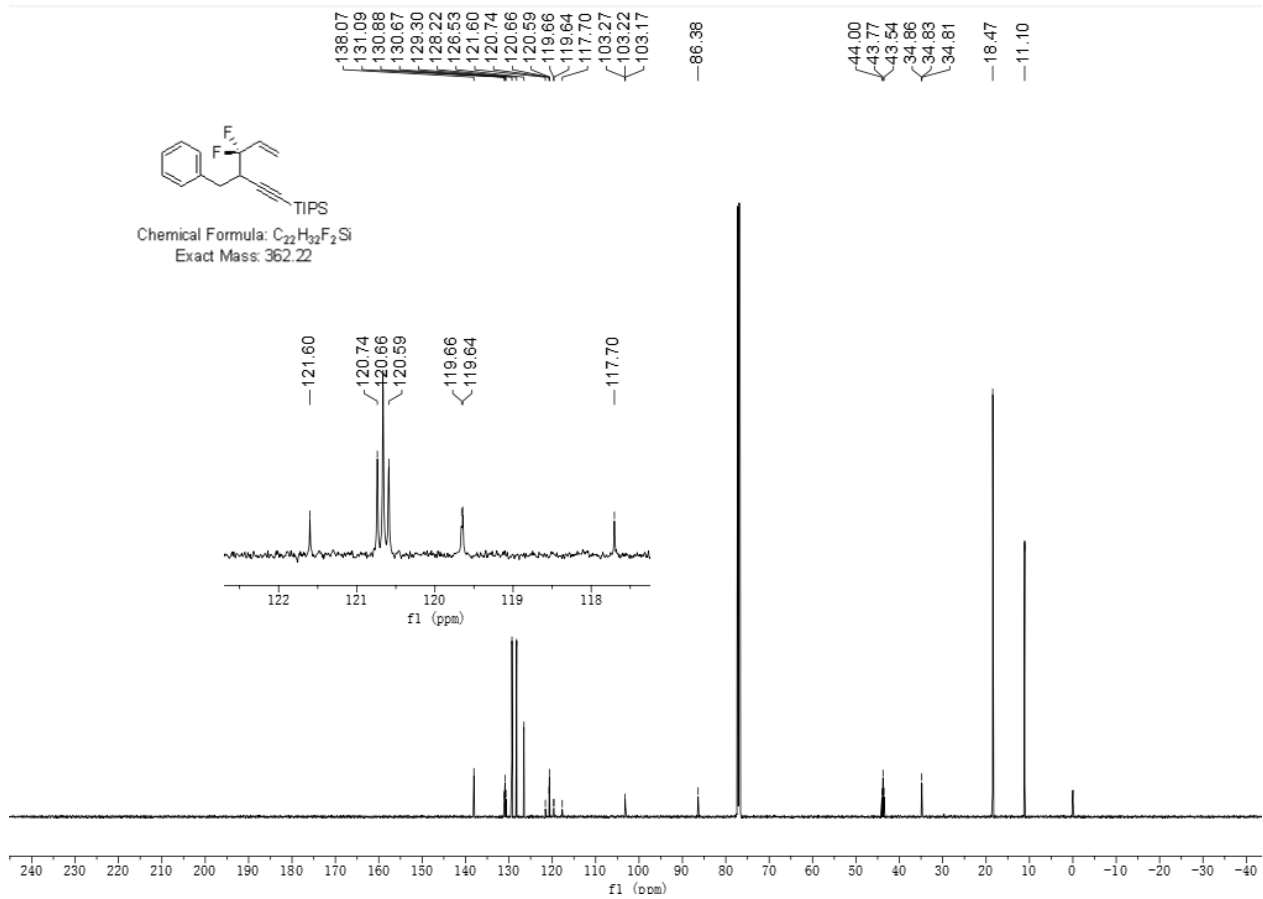

**(1,1-Difluoroallyl)hept-1-yn-1-yl)triisopropylsilane (3c)**

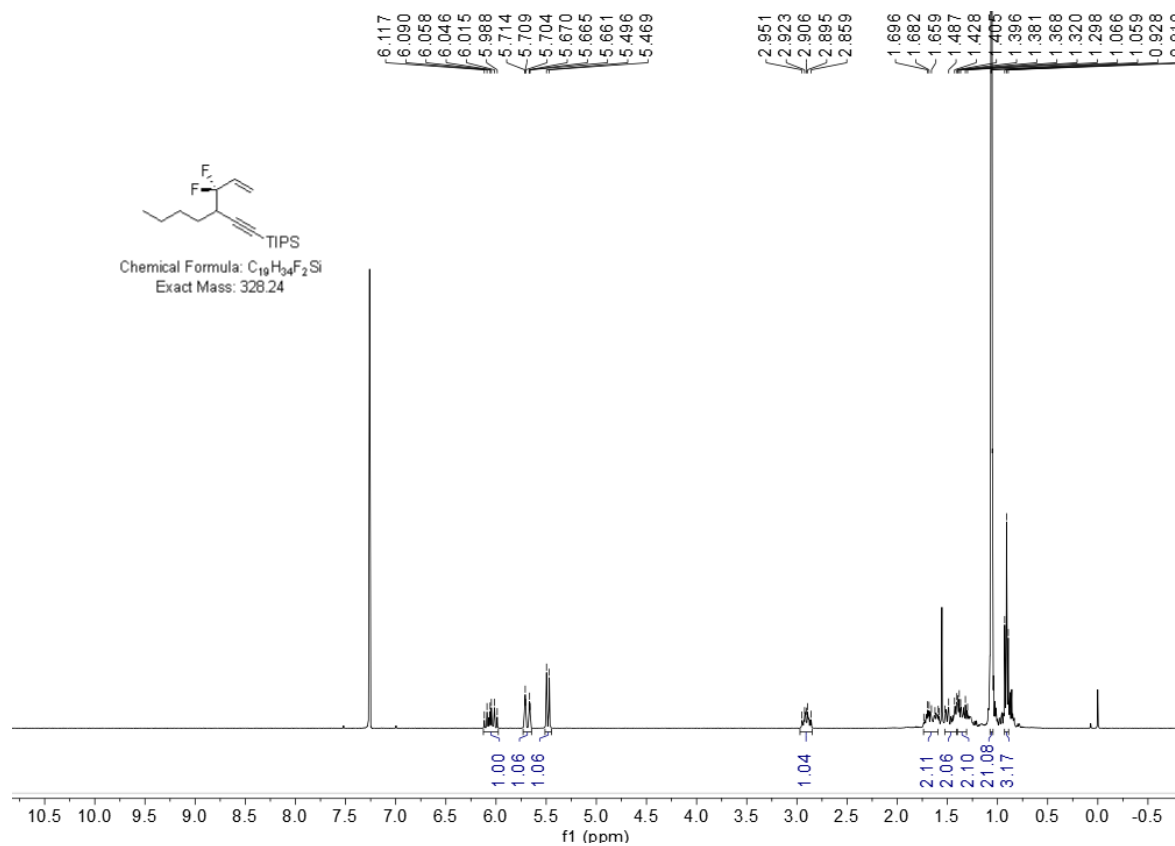

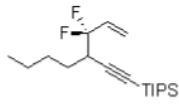

Chemical Formula:  $C_{19}H_{34}F_2Si$   
Exact Mass: 328.24

98.343  
98.372  
98.399  
98.979  
99.007  
99.034  
105.948  
105.985  
106.023  
106.583  
106.621  
106.658

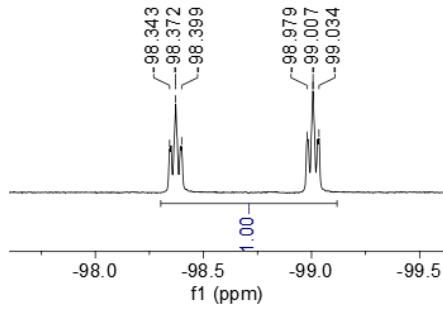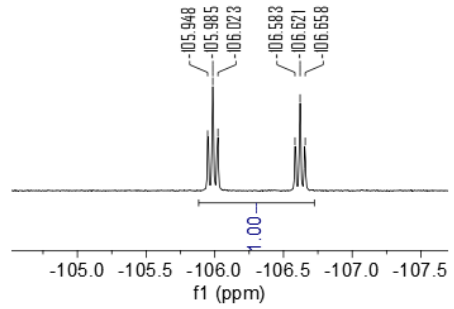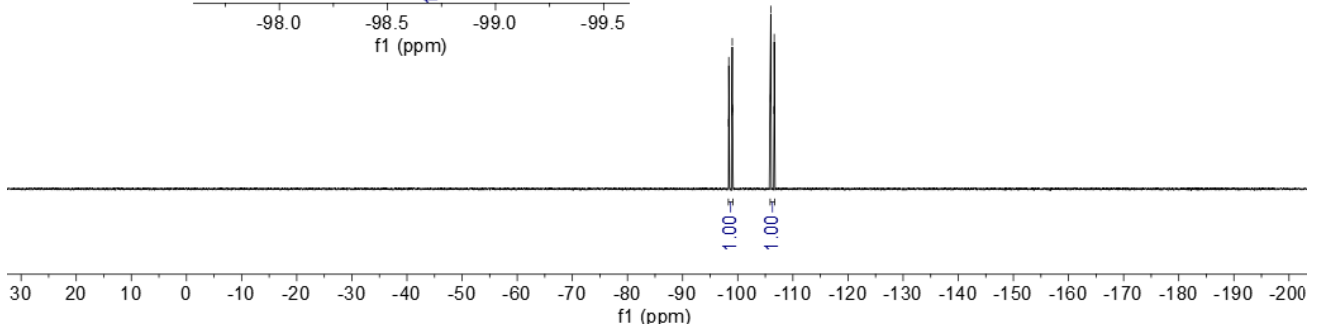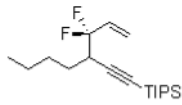

Chemical Formula:  $C_{19}H_{34}F_2Si$   
Exact Mass: 328.24

131.35  
131.09  
130.83  
122.36  
120.32  
120.23  
120.14  
119.95  
119.93  
117.51  
104.27  
104.21  
104.14  
-85.05  
41.68  
41.39  
41.10  
29.22  
28.16  
28.14  
28.13  
28.11  
22.21  
18.54  
13.88  
11.20

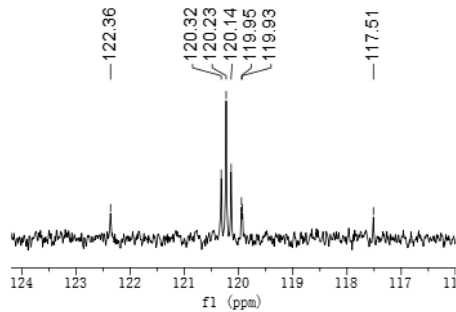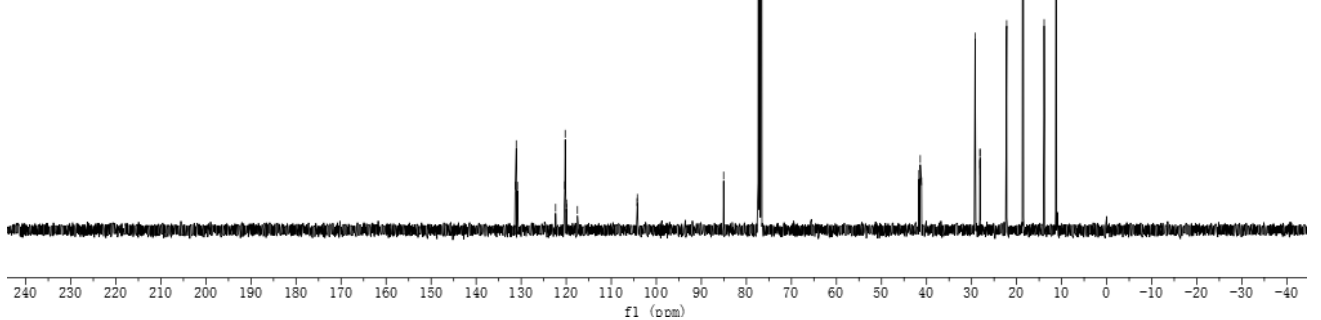

**(3-(2-Cyclohexylethyl)-4,4-difluorohex-5-en-1-yn-1-yl)triisopropylsilane (3d)**

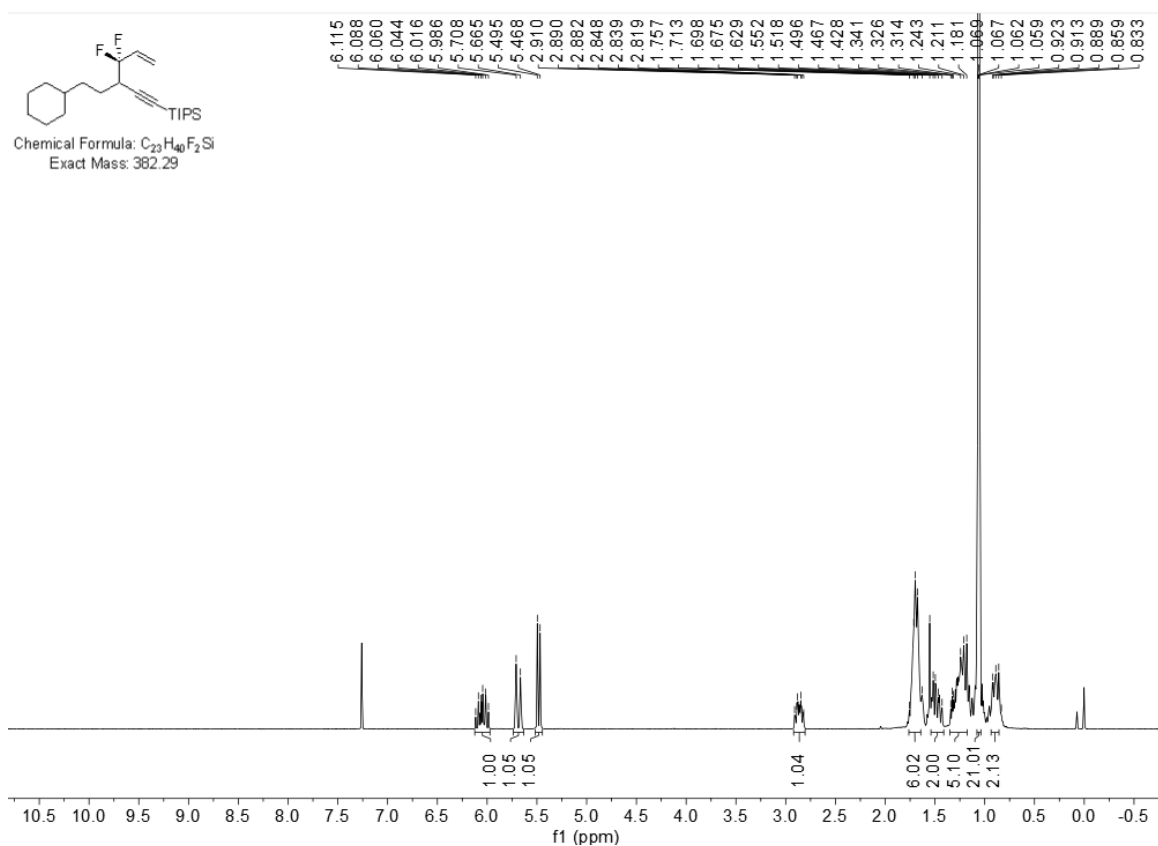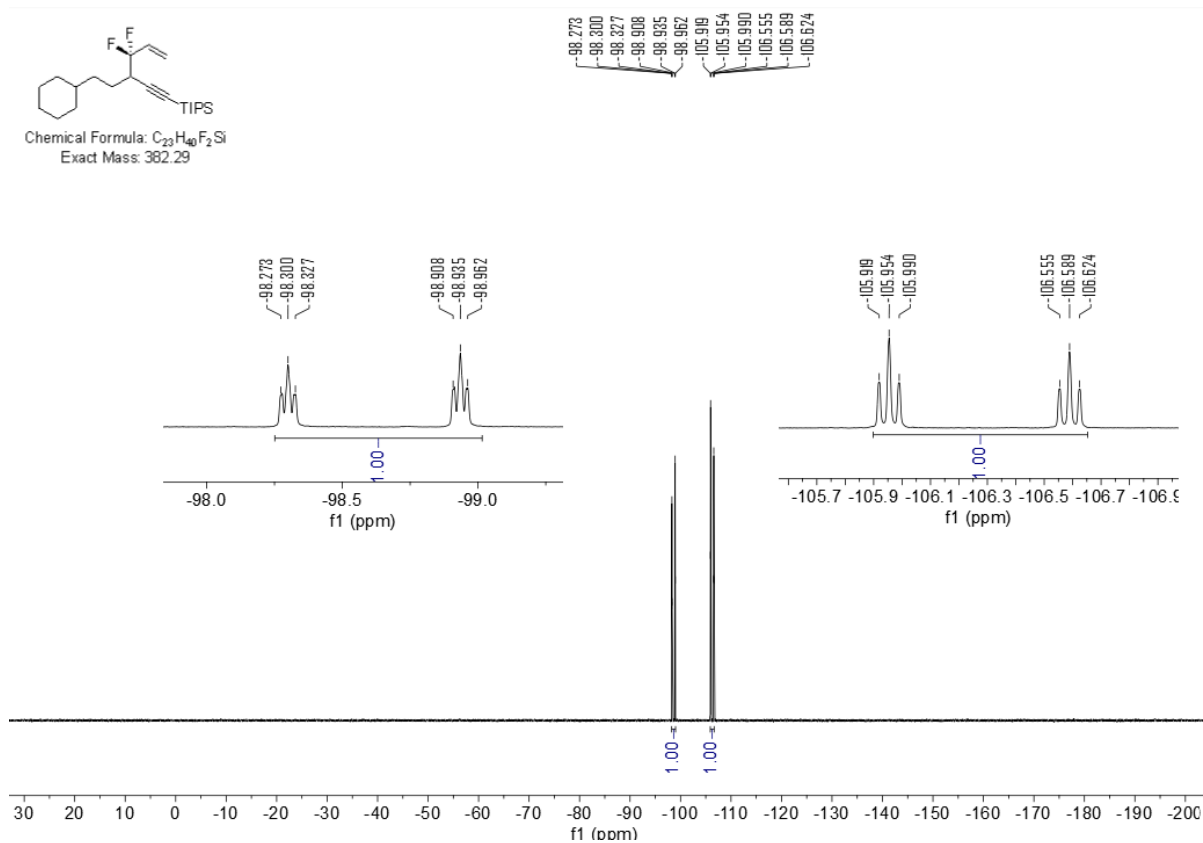

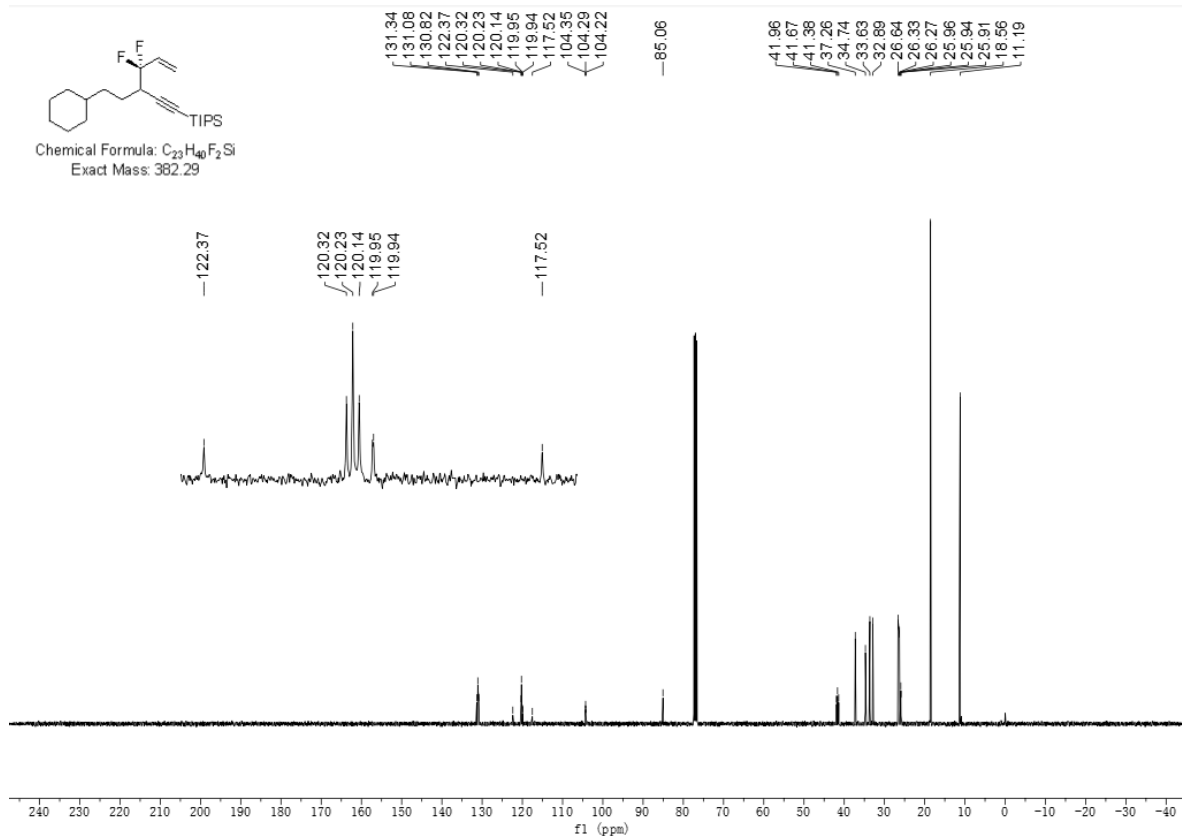

**(4,4-Difluoro-3-isobutylhex-5-en-1-yn-1-yl)triisopropylsilane (3e)**

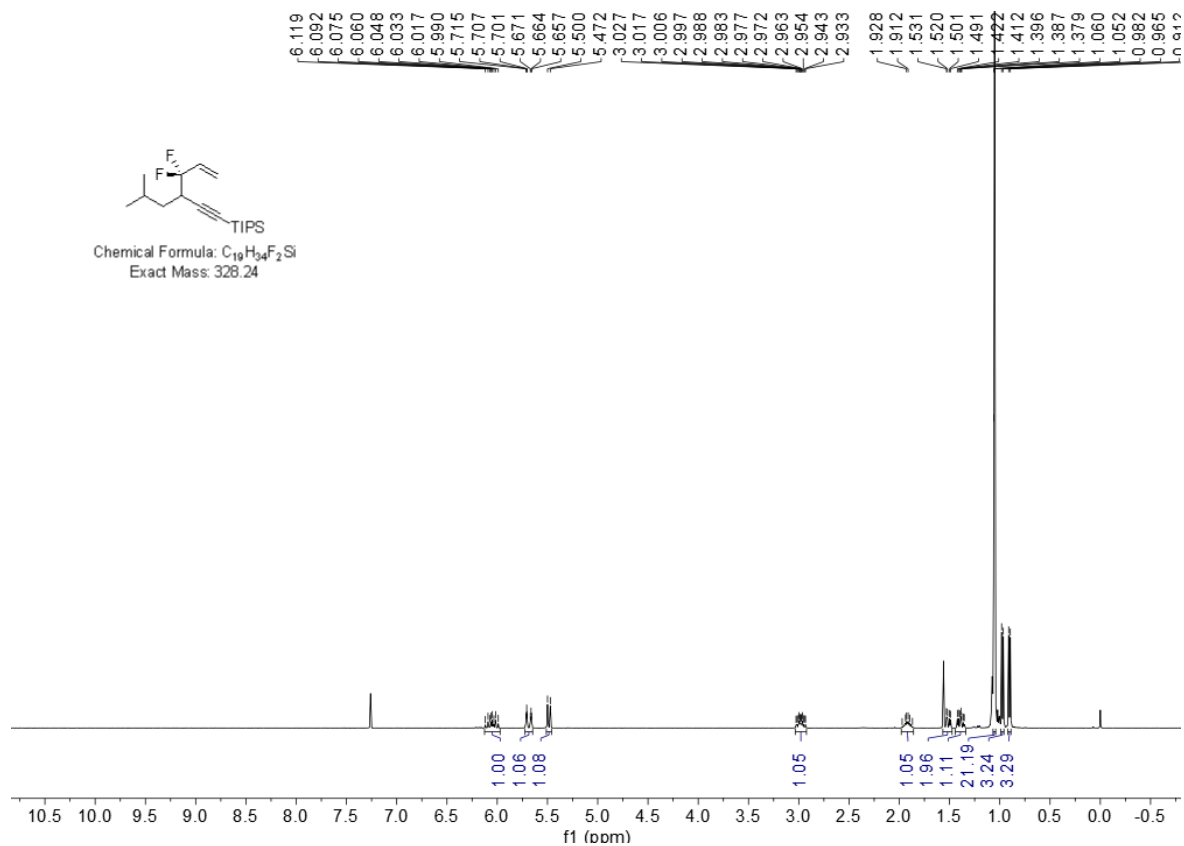



**(1,1-Difluoroallyl)-5,9-dimethyldec-8-en-1-yn-1-yl)triisopropylsilane (3f)**

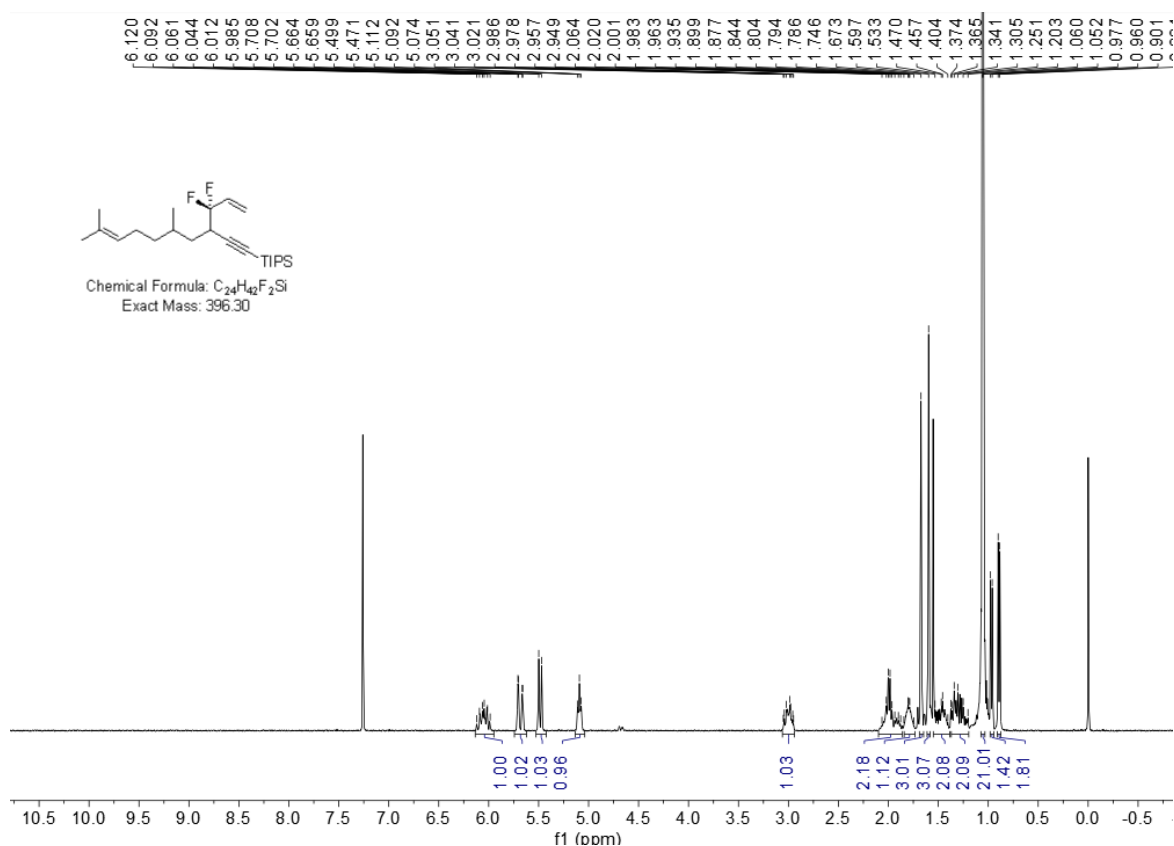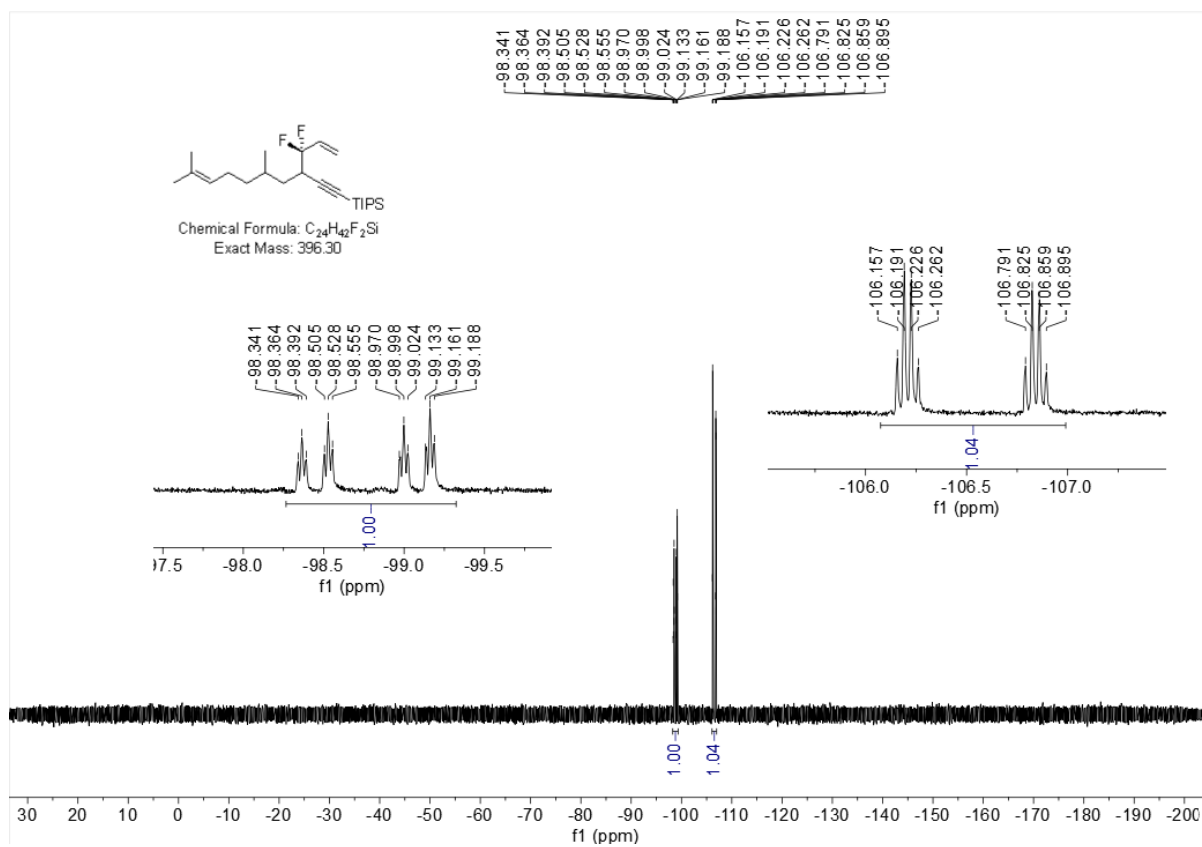



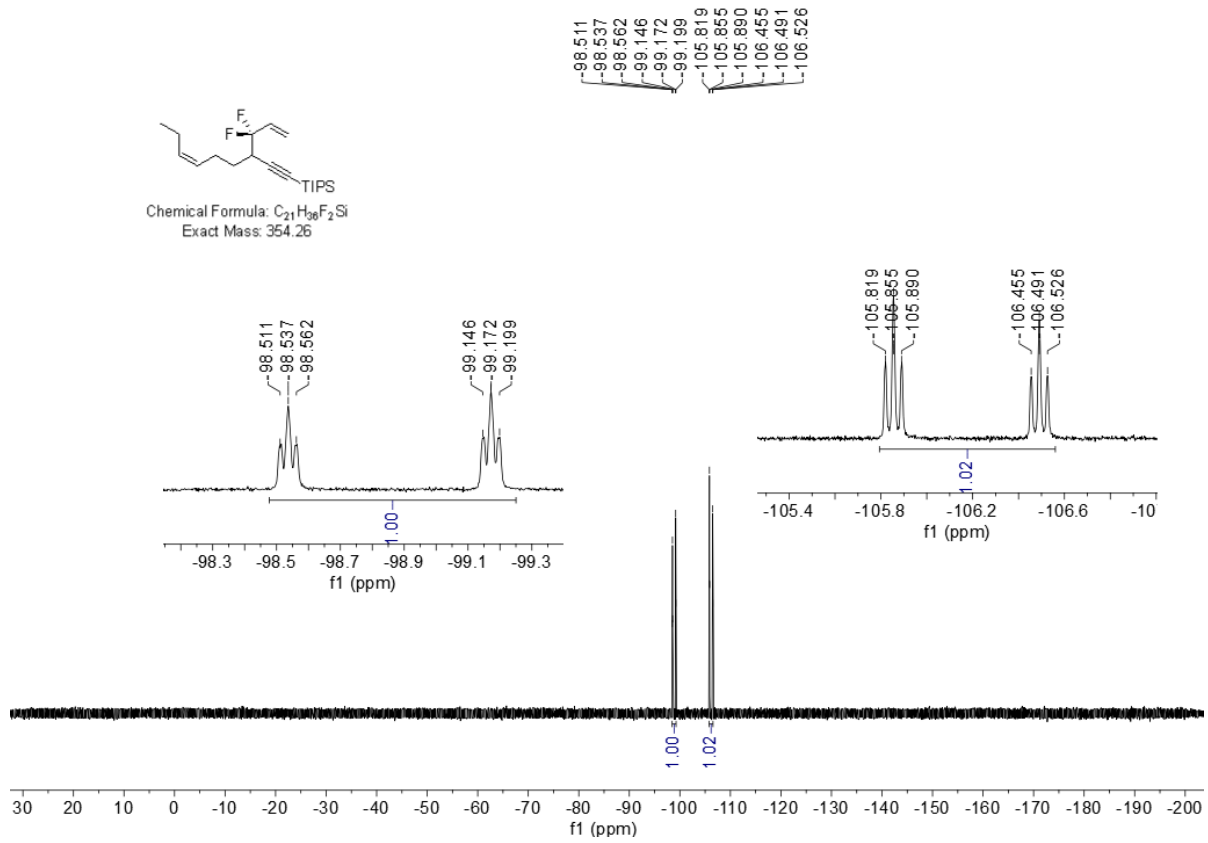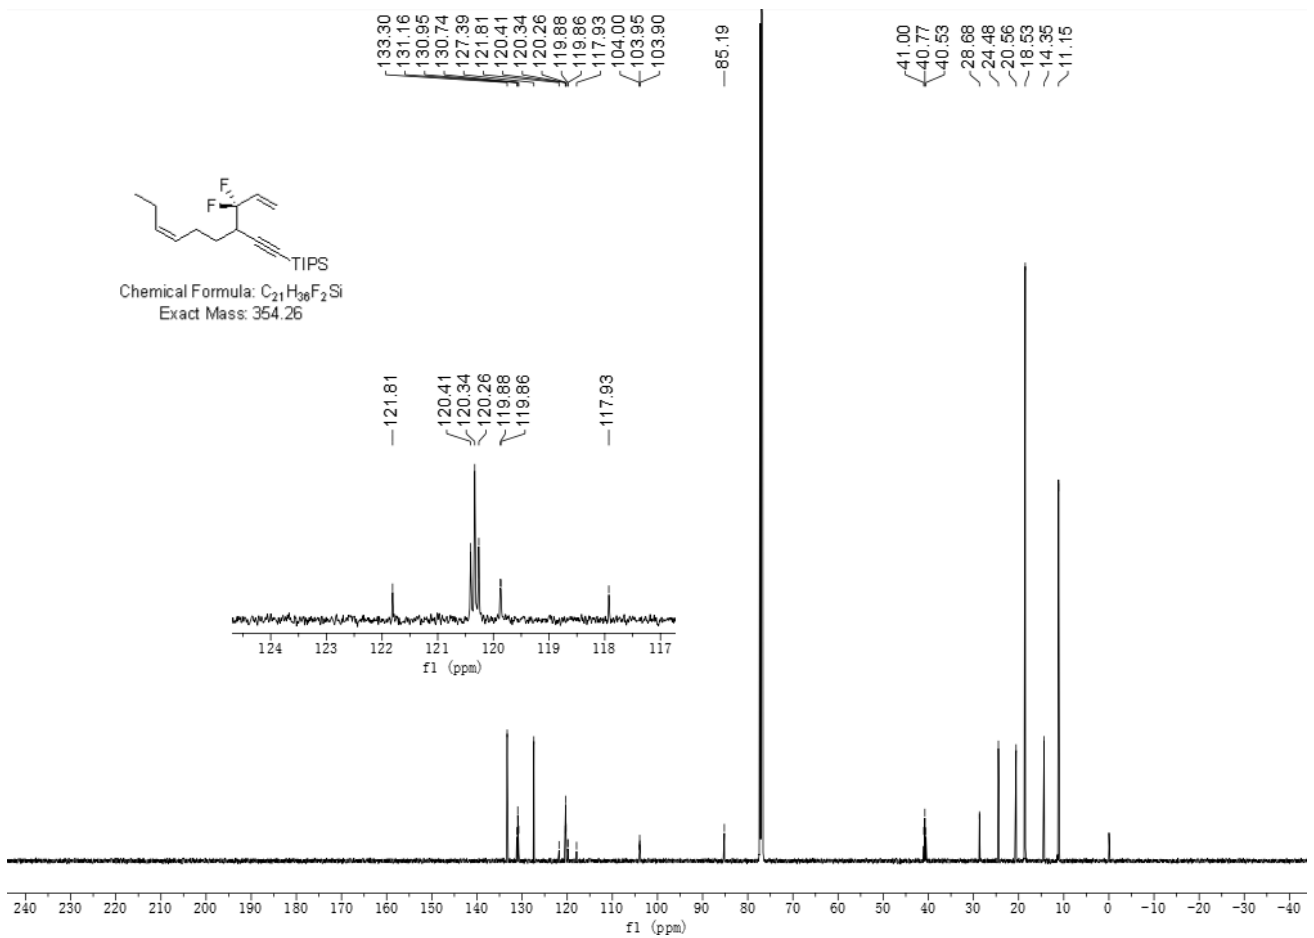



***tert*-Butyl((6,6-difluoro-5-((triisopropylsilyl)ethynyl)oct-7-en-1-yl)oxy)dimethylsilane (3h)**

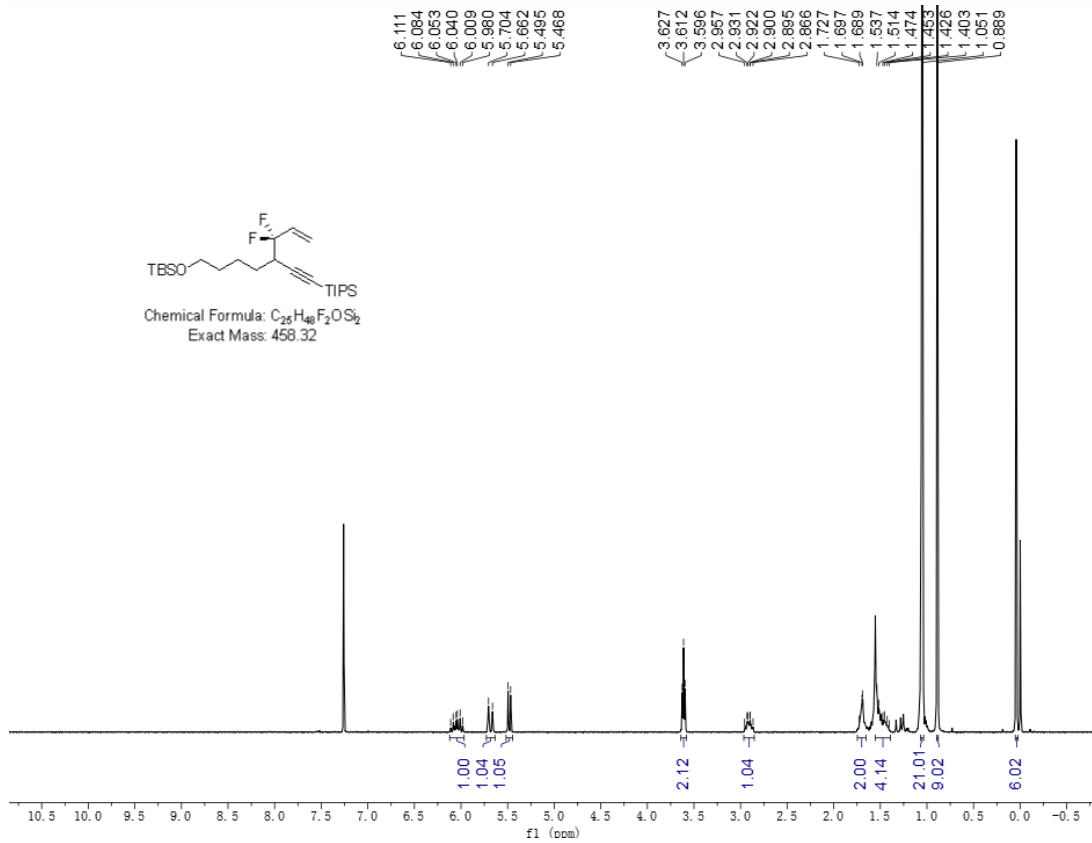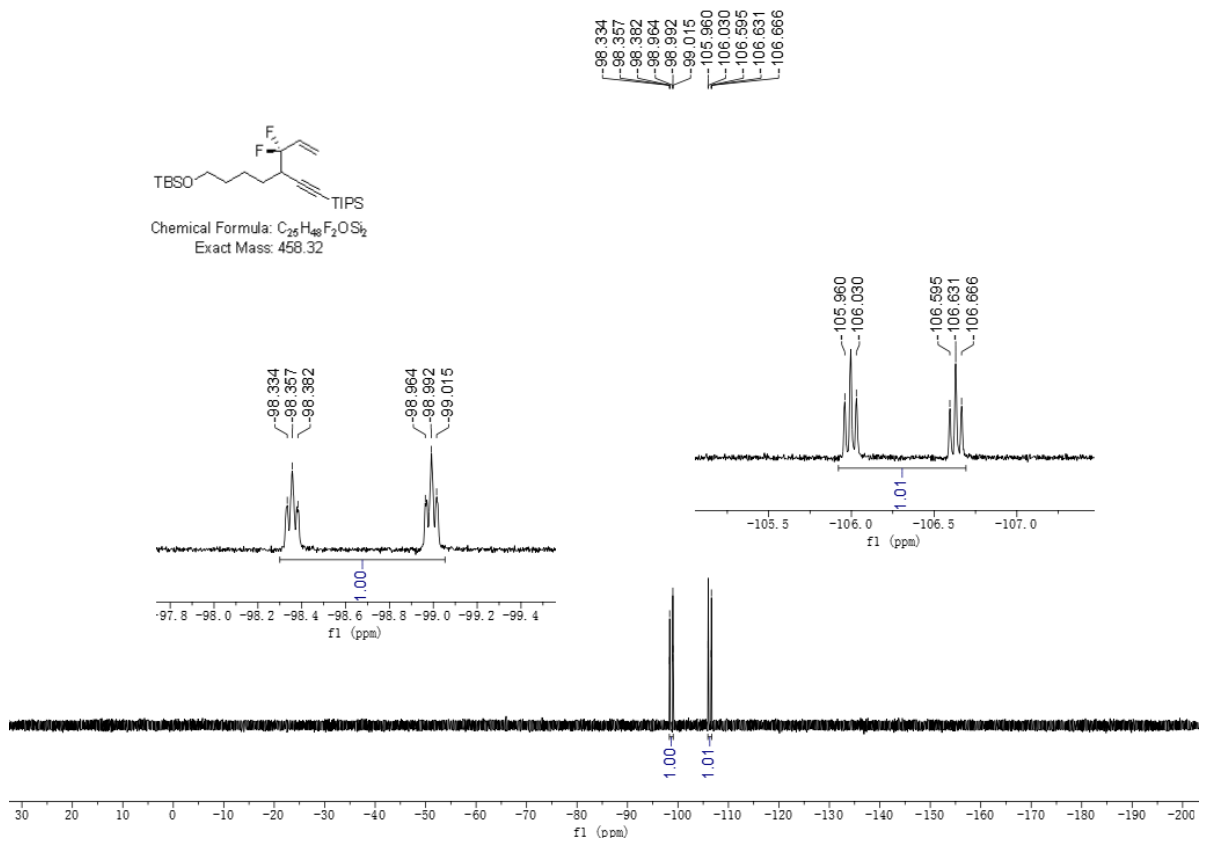

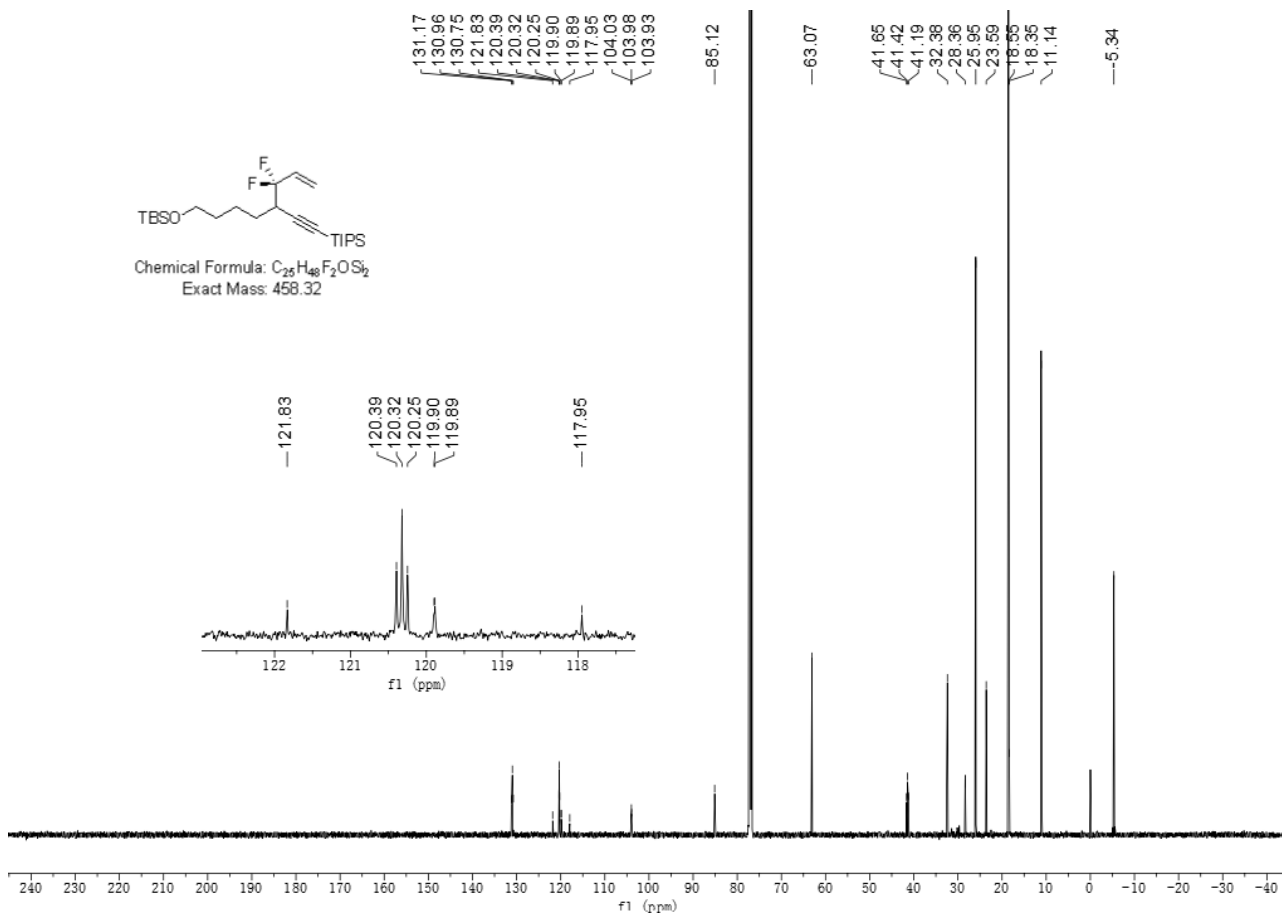

**(3-((Benzyloxy)methyl)-4,4-difluoro-5-en-1-yn-1-yl)triisopropylsilane (3i)**

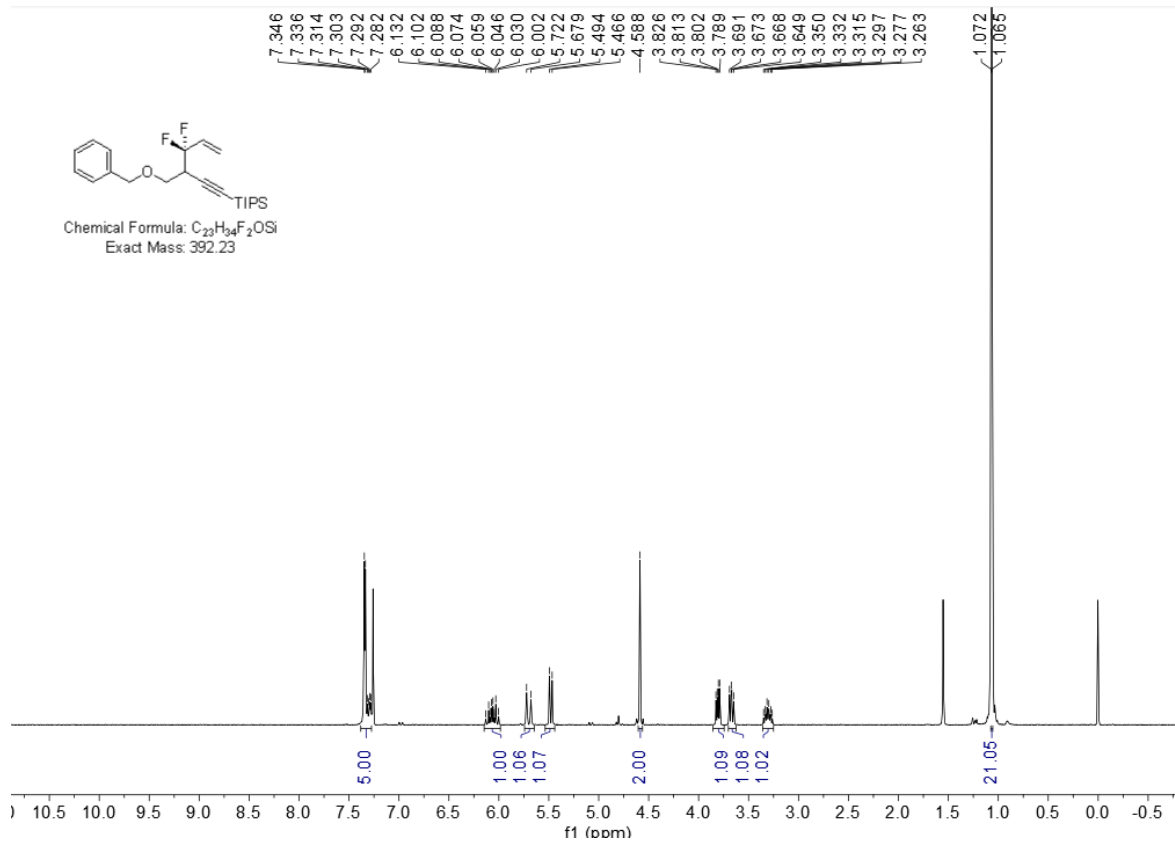

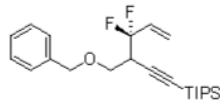

Chemical Formula:  $C_{23}H_{34}F_2OSi$   
Exact Mass: 392.23

98.340  
98.369  
98.399  
98.985  
99.014  
99.043  
103.410  
103.447  
103.483  
104.055  
104.092  
104.128

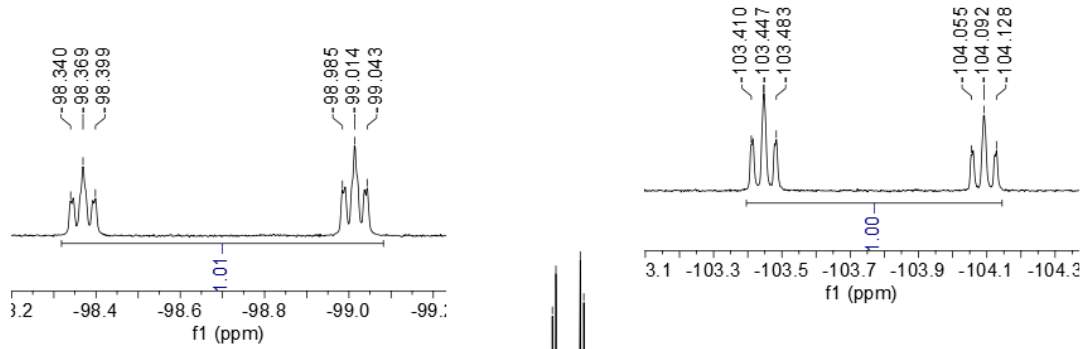

30 20 10 0 -10 -20 -30 -40 -50 -60 -70 -80 -90 -100 -110 -120 -130 -140 -150 -160 -170 -180 -190 -200

137.87  
131.15  
130.94  
130.74  
128.35  
127.62  
127.51  
121.13  
120.44  
120.36  
120.29  
119.18  
117.23  
102.14  
102.09  
102.04  
-85.77  
-73.29  
-68.57  
-42.39  
-42.16  
-41.94  
-18.54  
-11.13

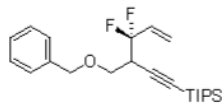

Chemical Formula:  $C_{23}H_{34}F_2OSi$   
Exact Mass: 392.23

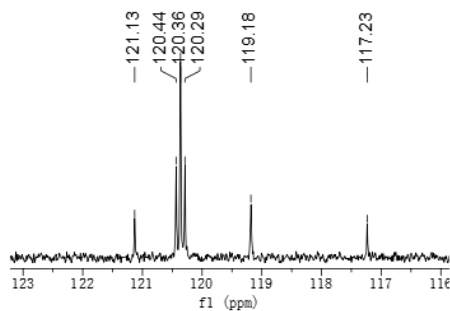

240 230 220 210 200 190 180 170 160 150 140 130 120 110 100 90 80 70 60 50 40 30 20 10 0 -10 -20 -30 -40

**(3-((Benzyloxy)methyl)-6,6-difluorohex-5-en-1-yn-1-yl)triisopropylsilane (4i)**

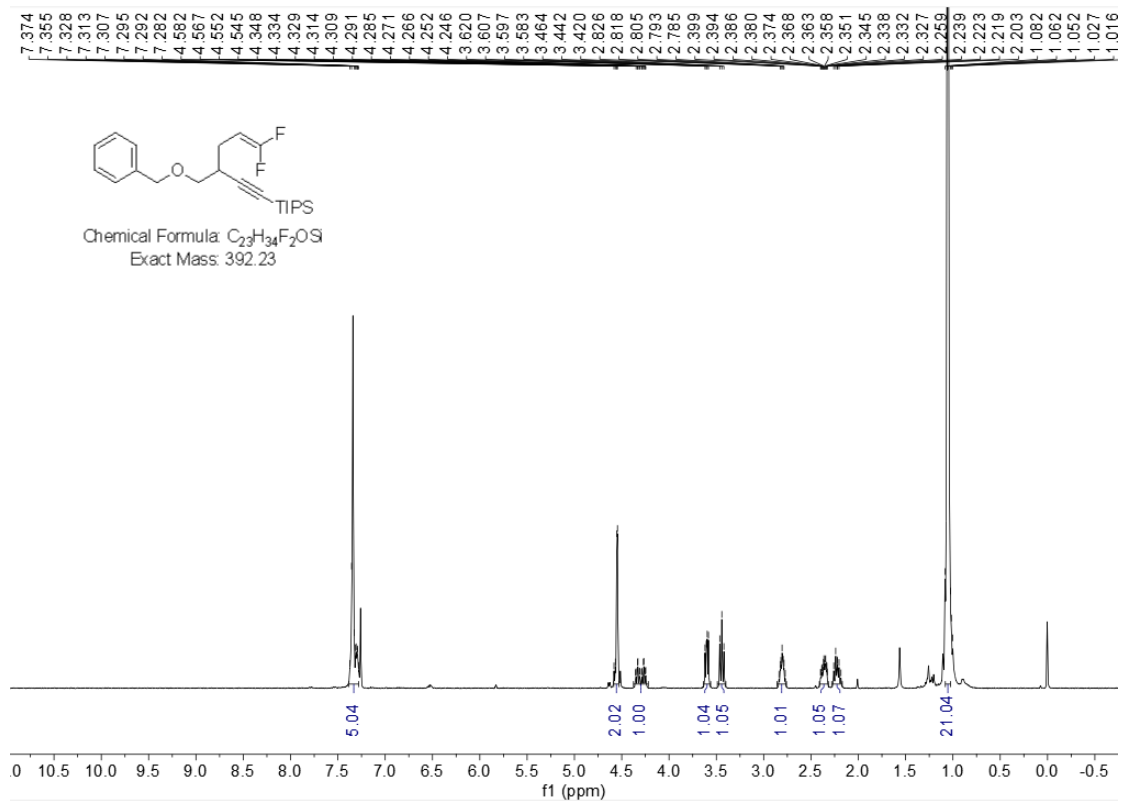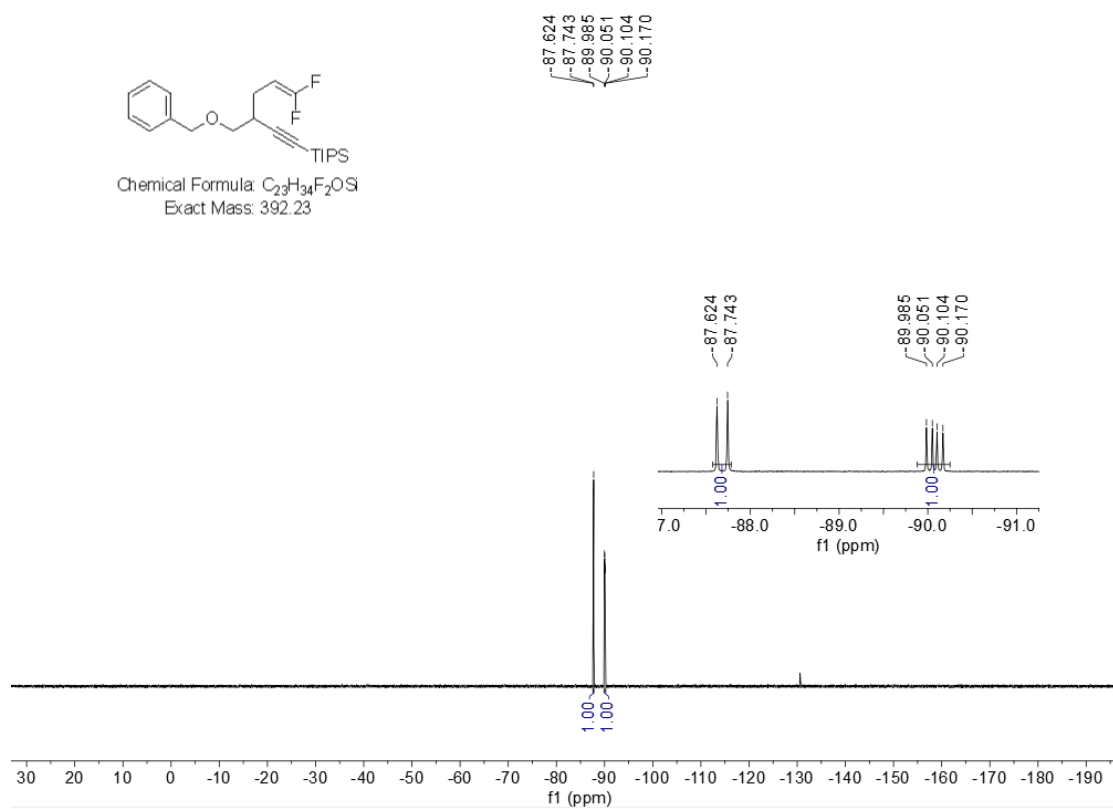

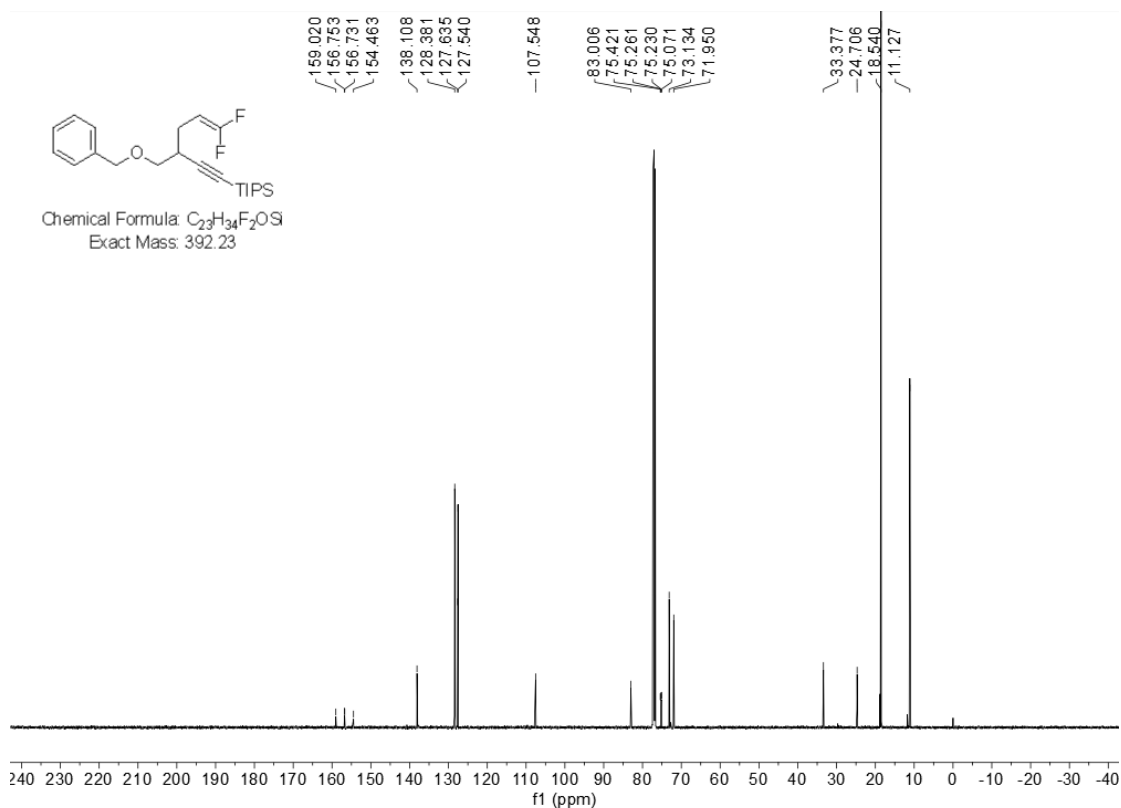

### 5,5-Difluoro-4-((triisopropylsilyl)ethynyl)hept-6-en-1-ol (3j)

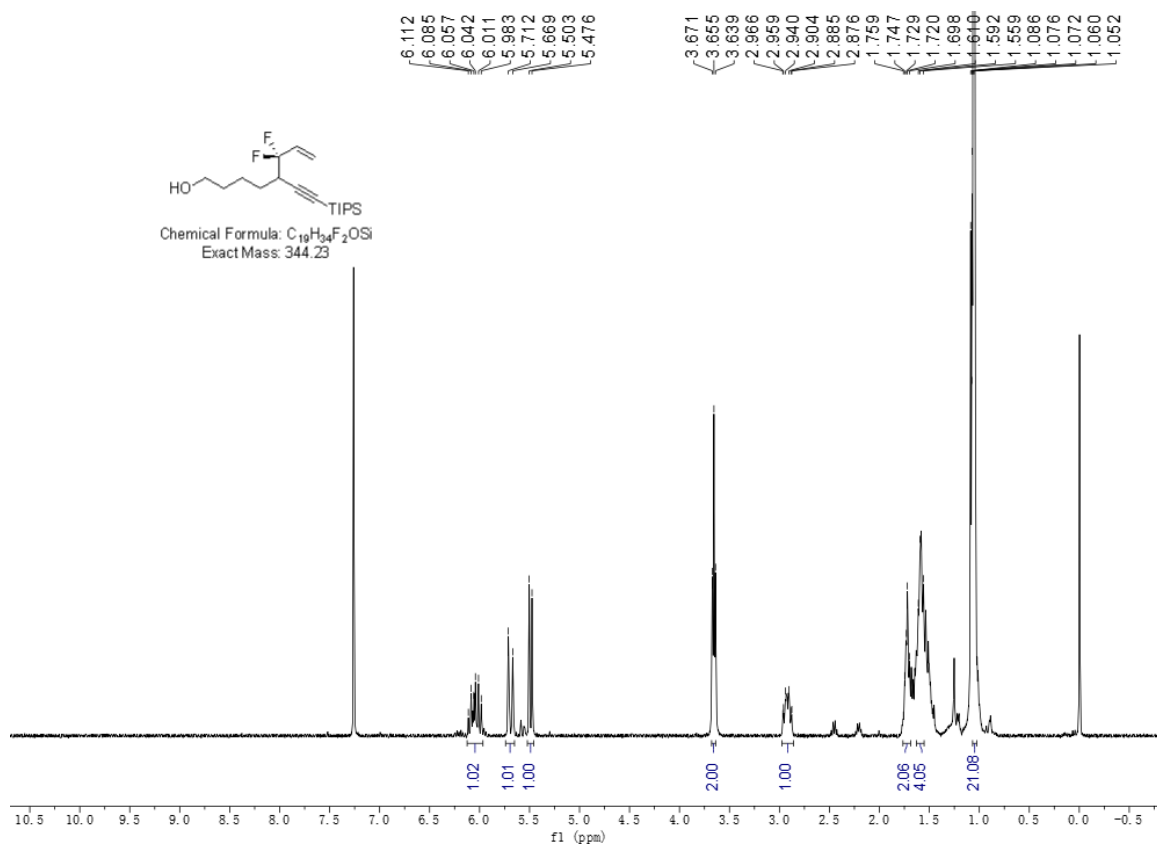

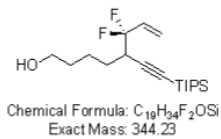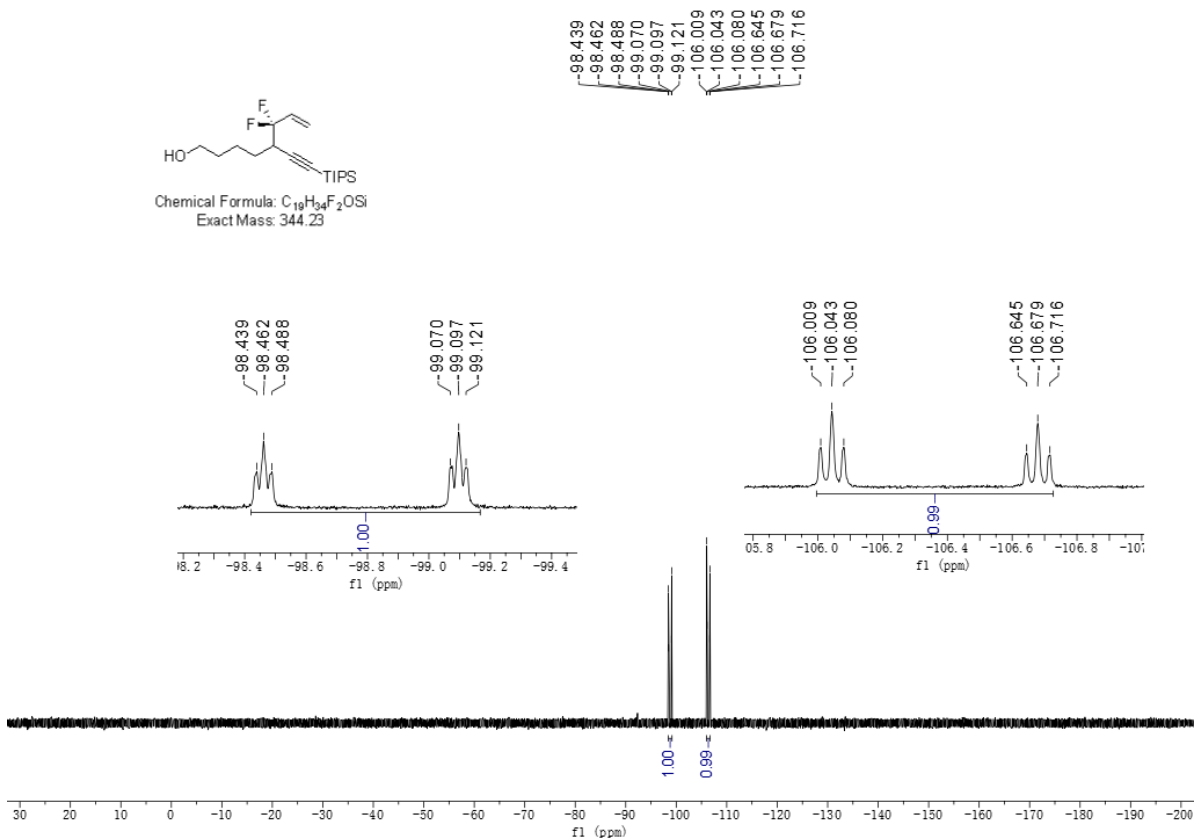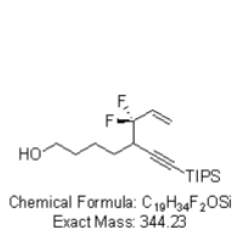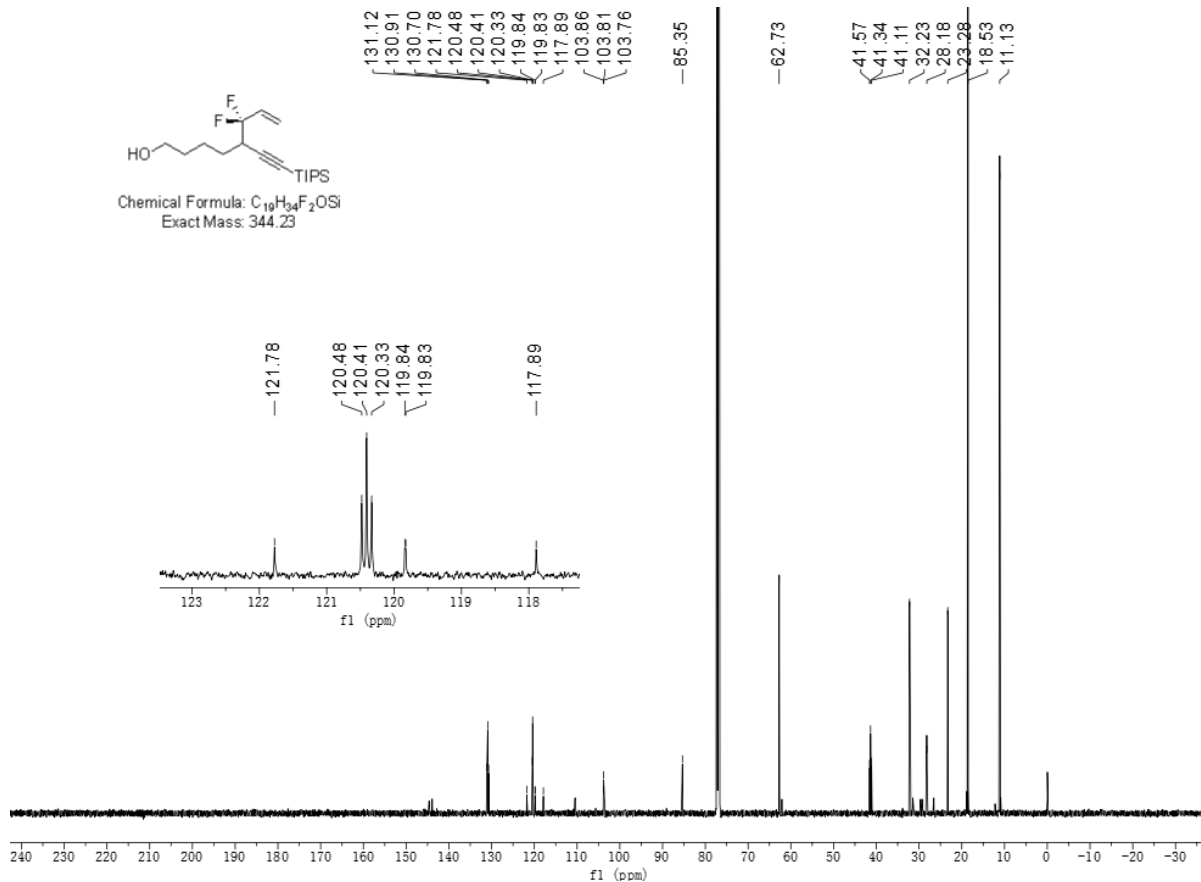

**1-(*tert*-Butyl) 4-(6,6-Difluoro-5-((triisopropylsilyl)ethynyl)oct-7-en-1-yl) piperidine-1,4-dicarboxylate (3k)**

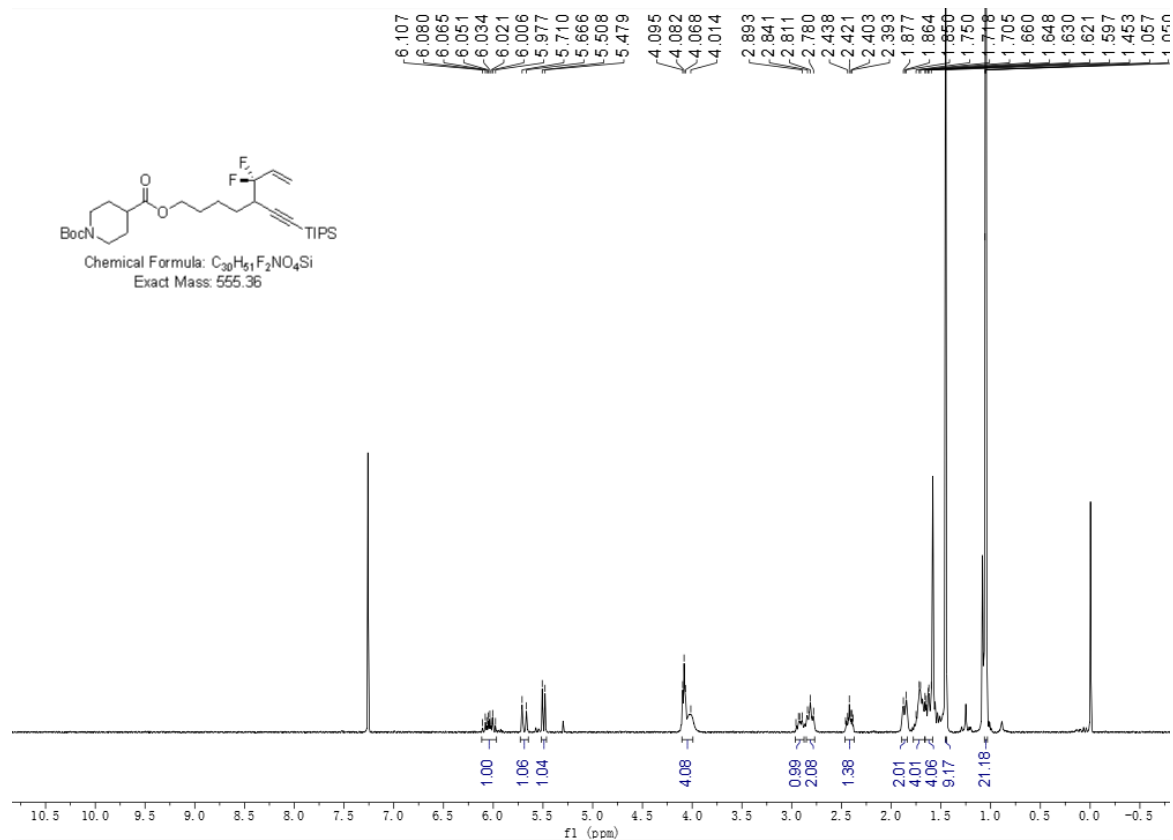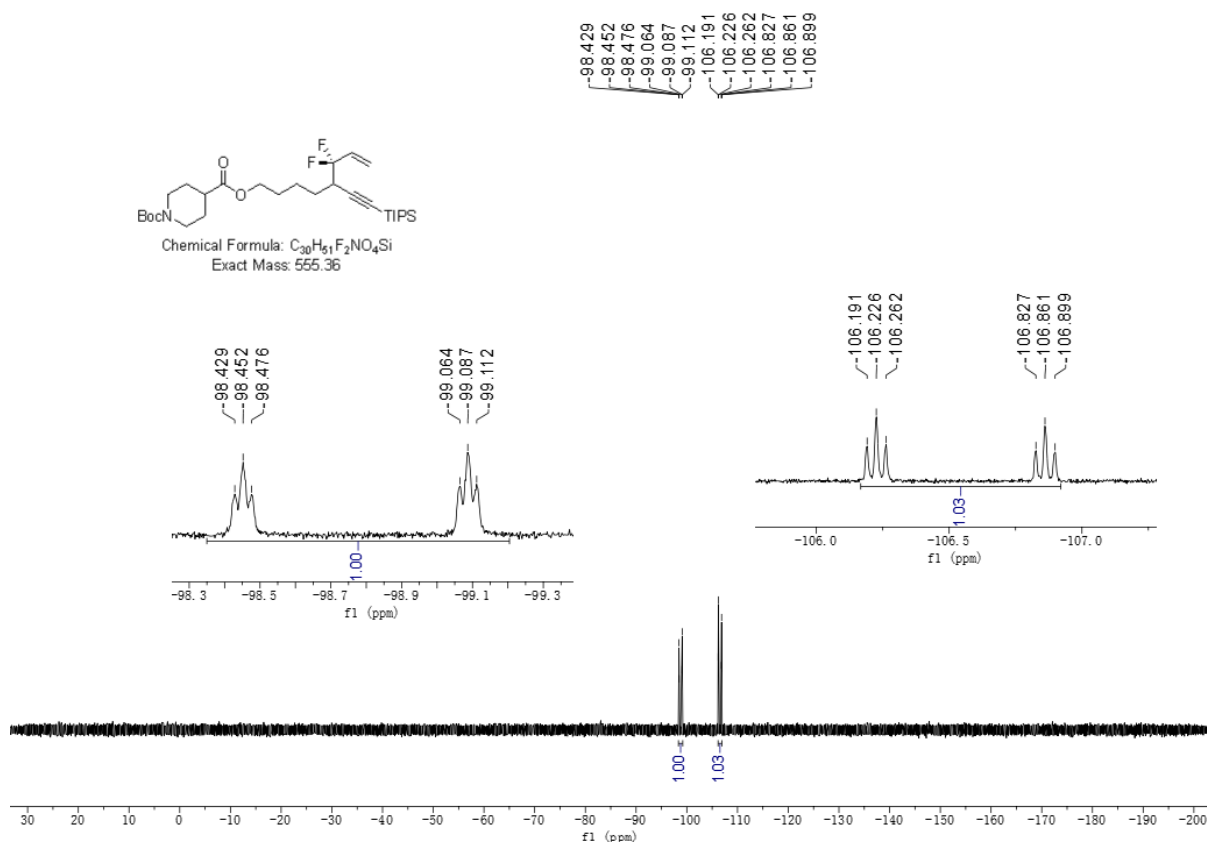

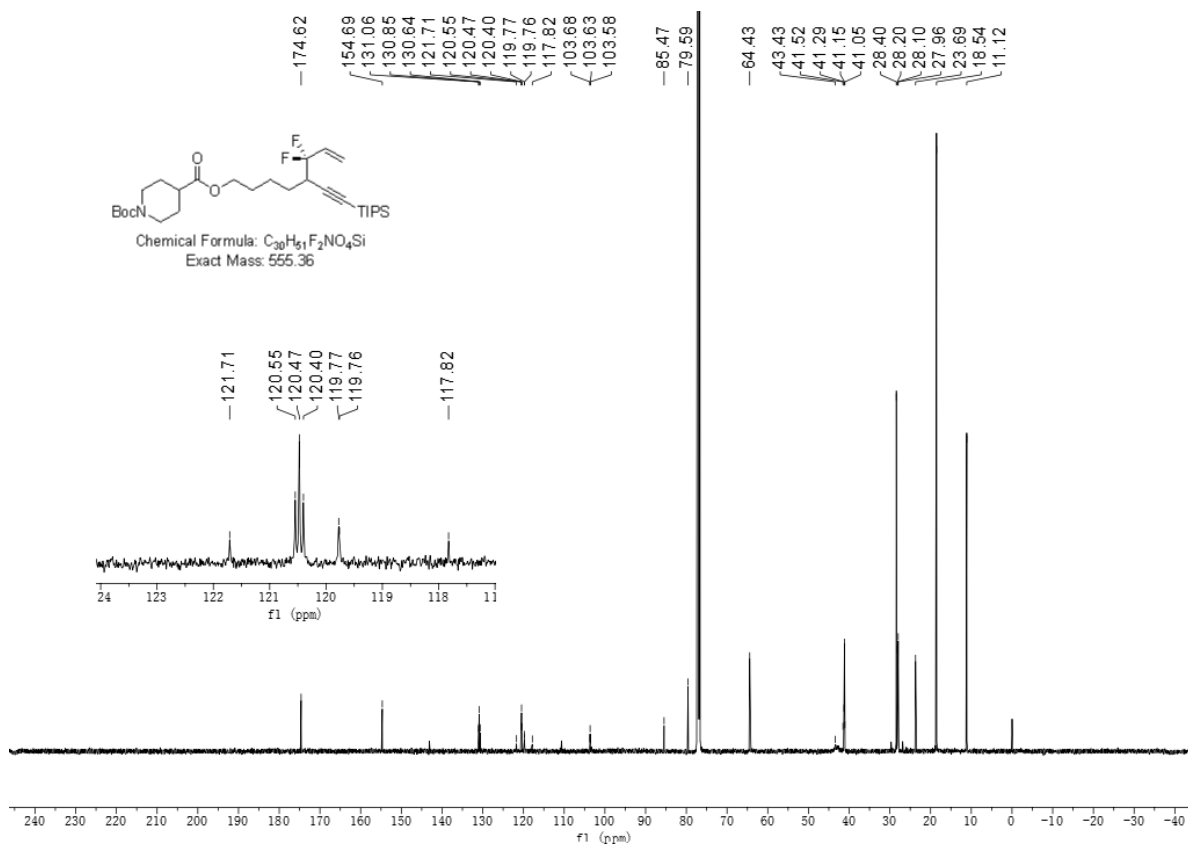

### 6,6-Difluoro-5-((triisopropylsilyl)ethynyl)oct-7-en-1-yl 4-nitrobenzoate (31)

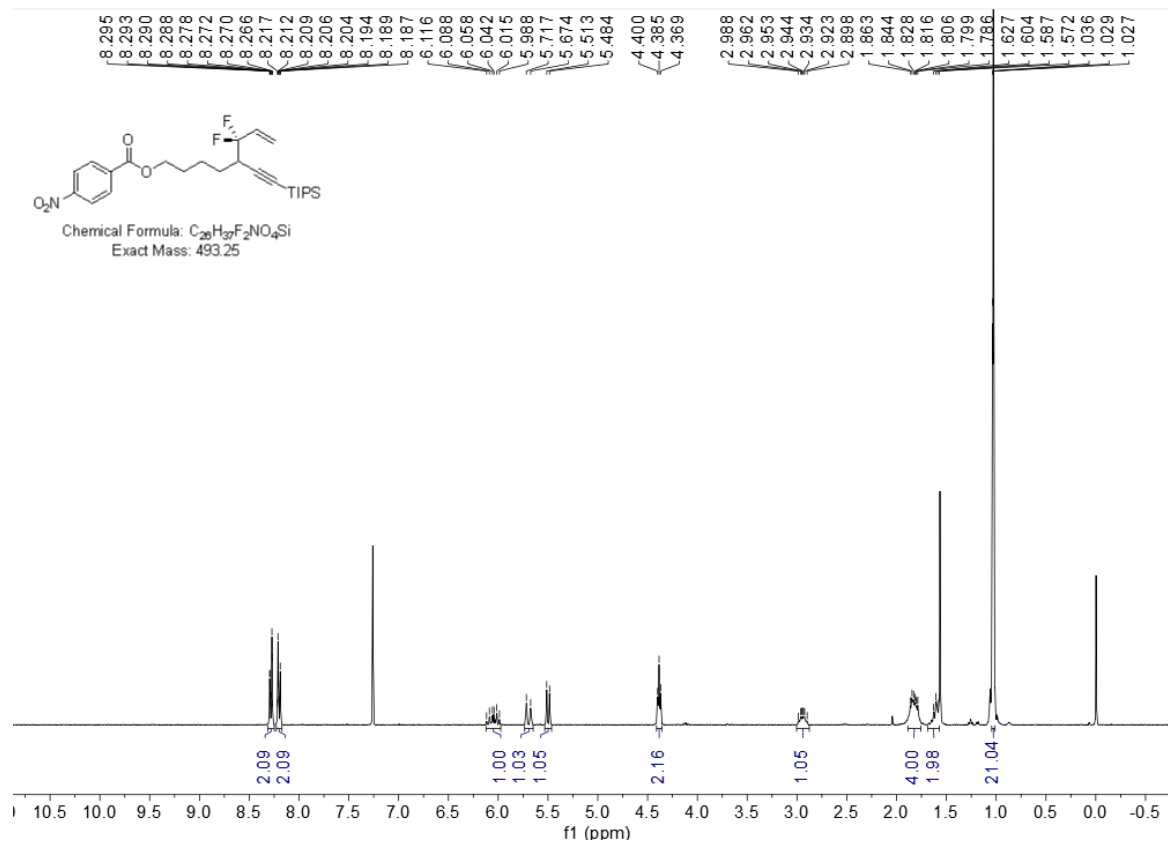



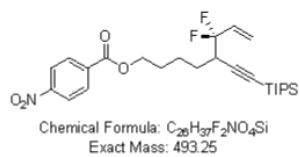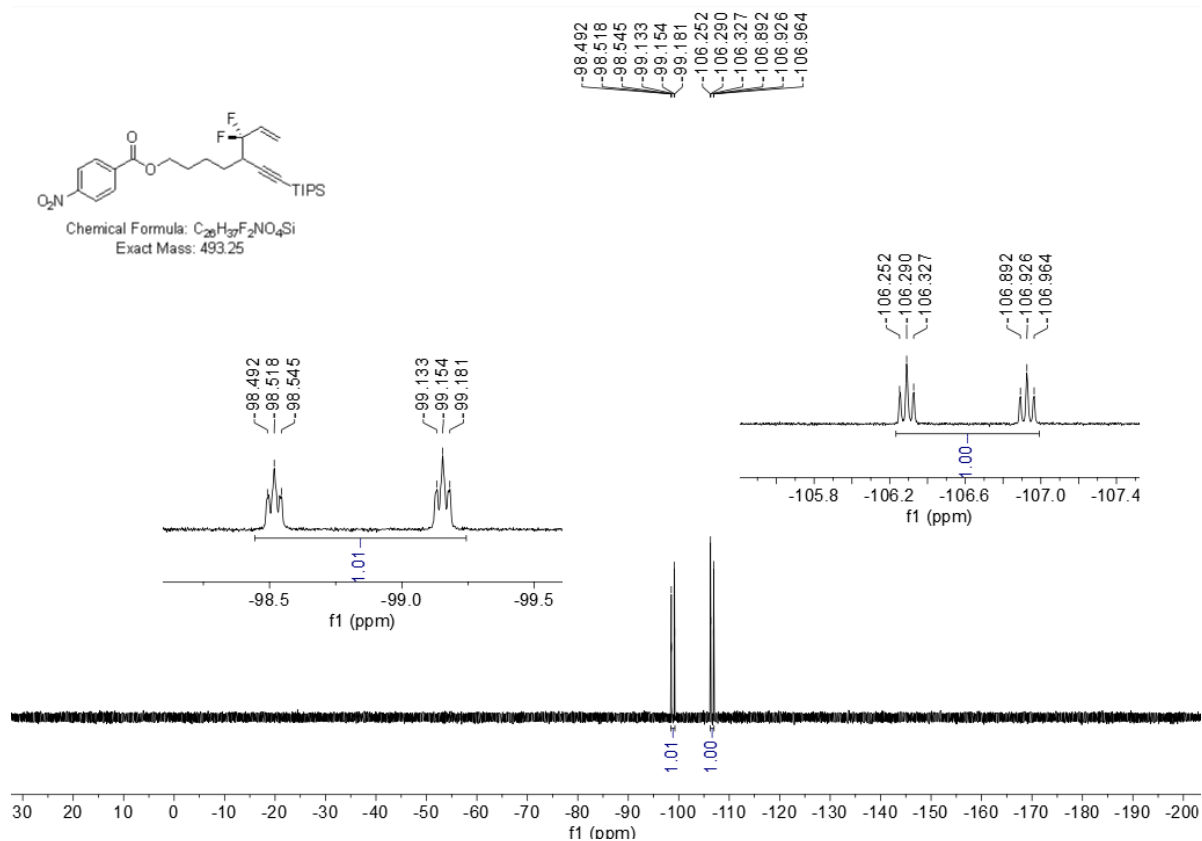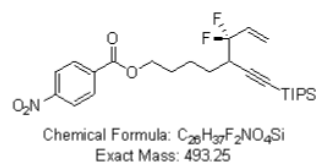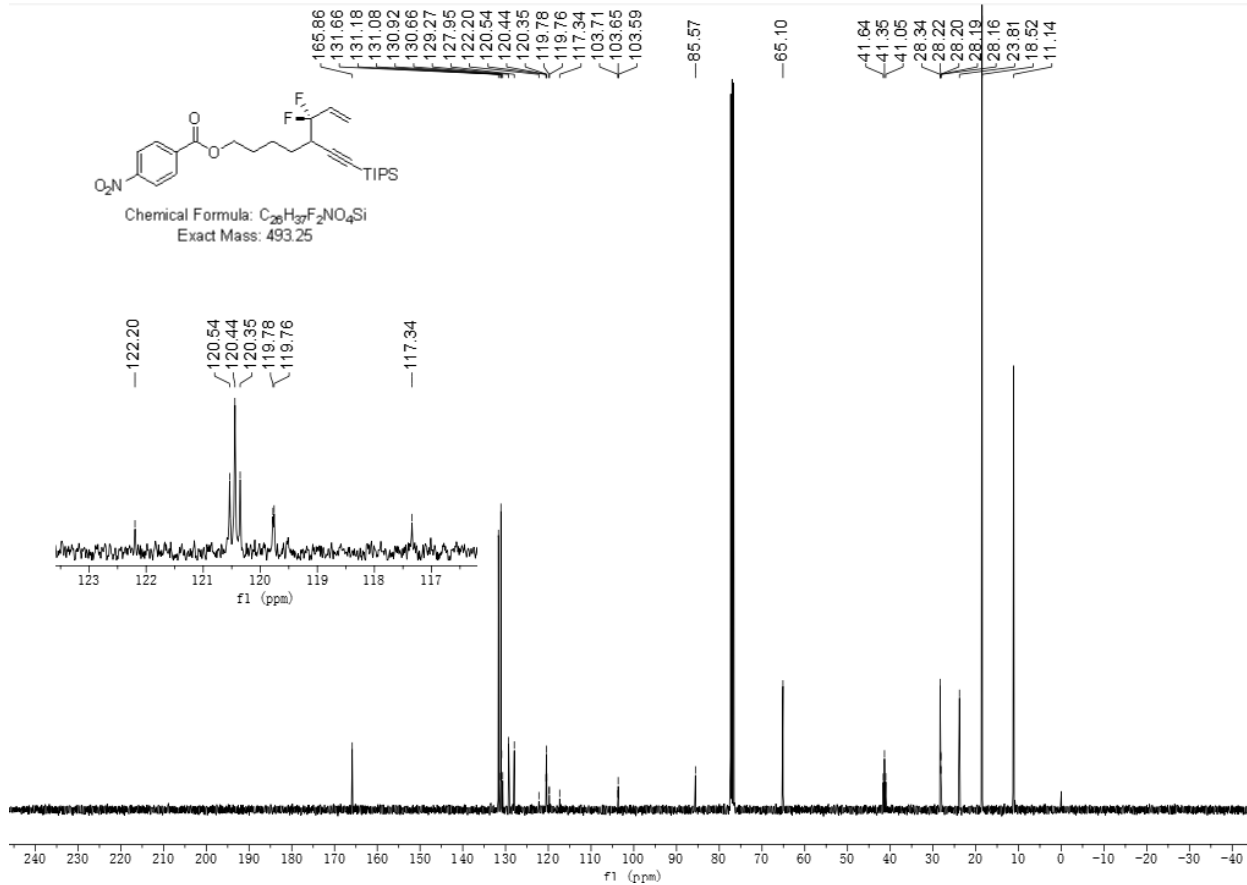

# 6,6-Difluoro-5-((triisopropylsilyl)ethynyl)oct-7-en-1-yl 4-bromobenzoate (3m)

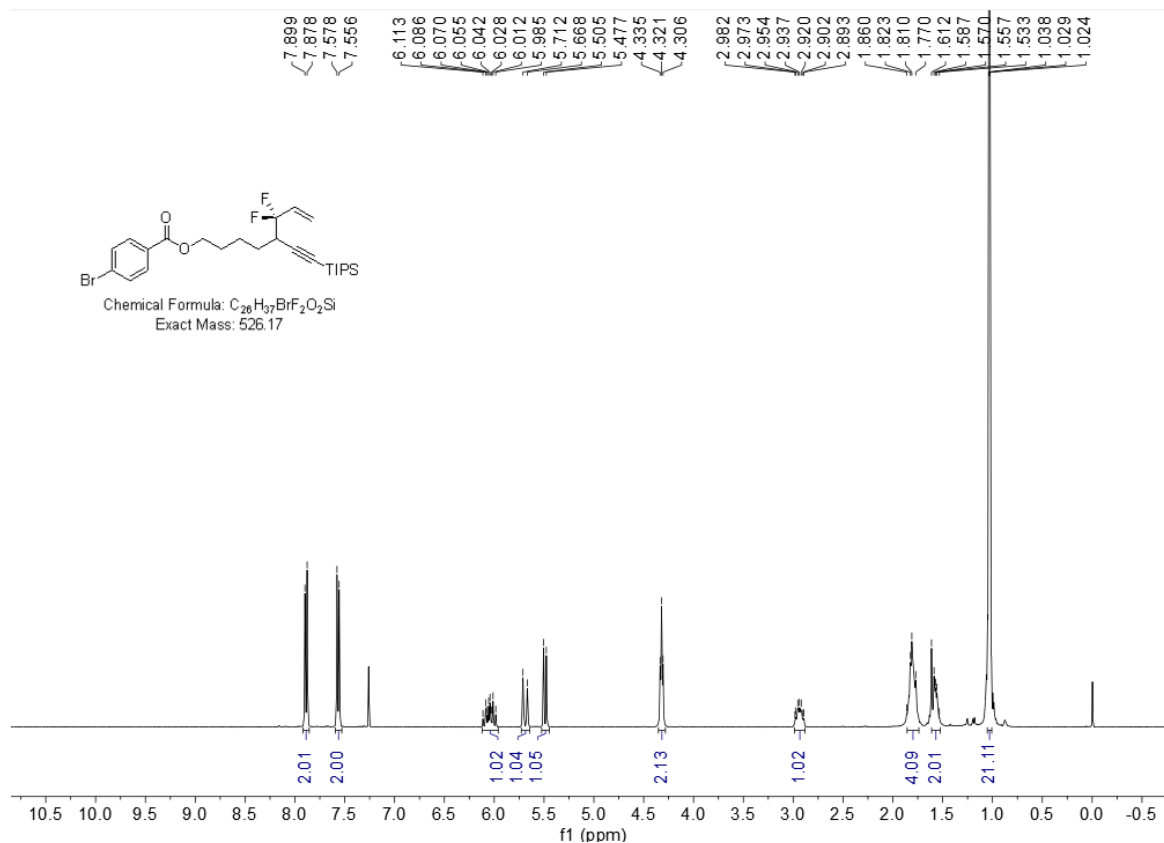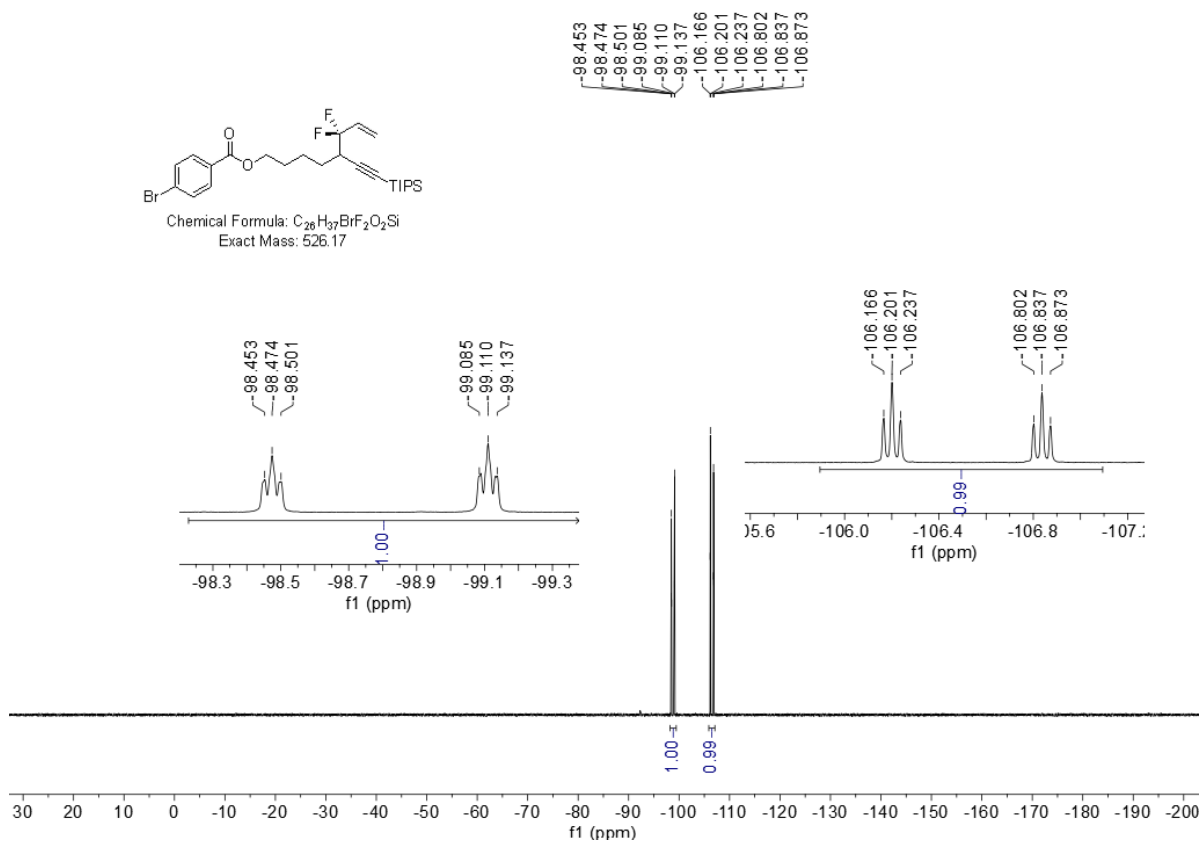

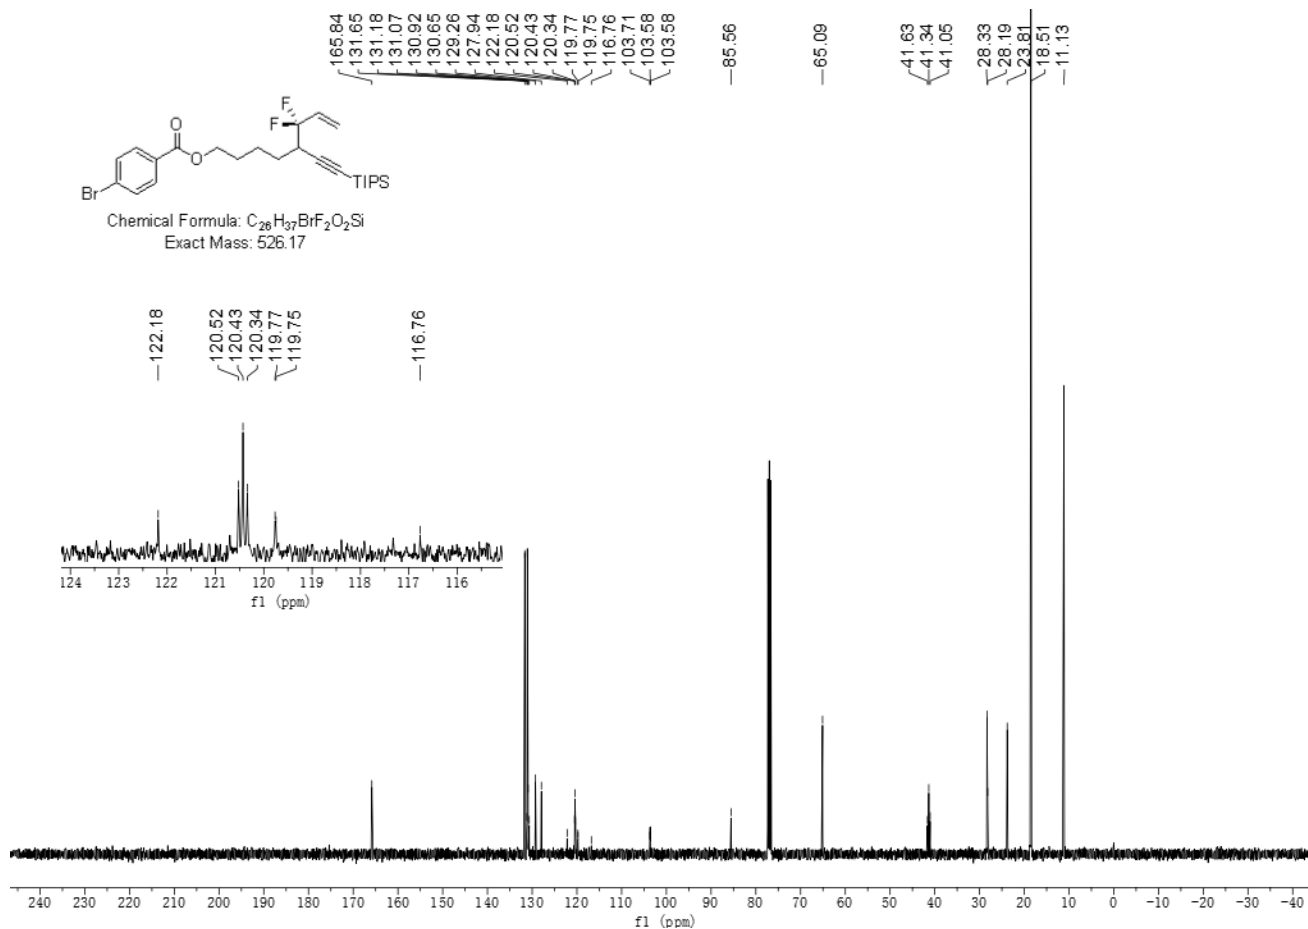

### Chloro-3-(1,1-difluoroallyl)hept-1-yn-1-yl)triisopropylsilane (3n)

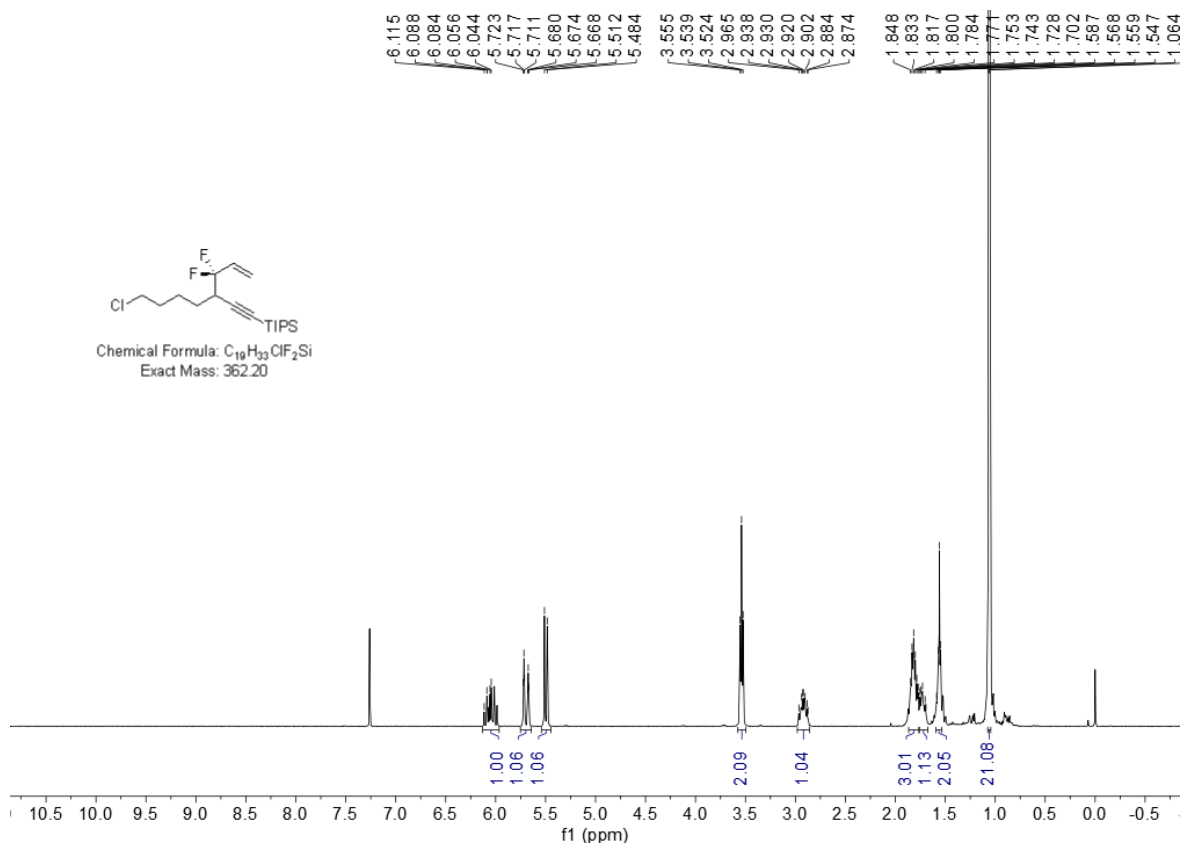

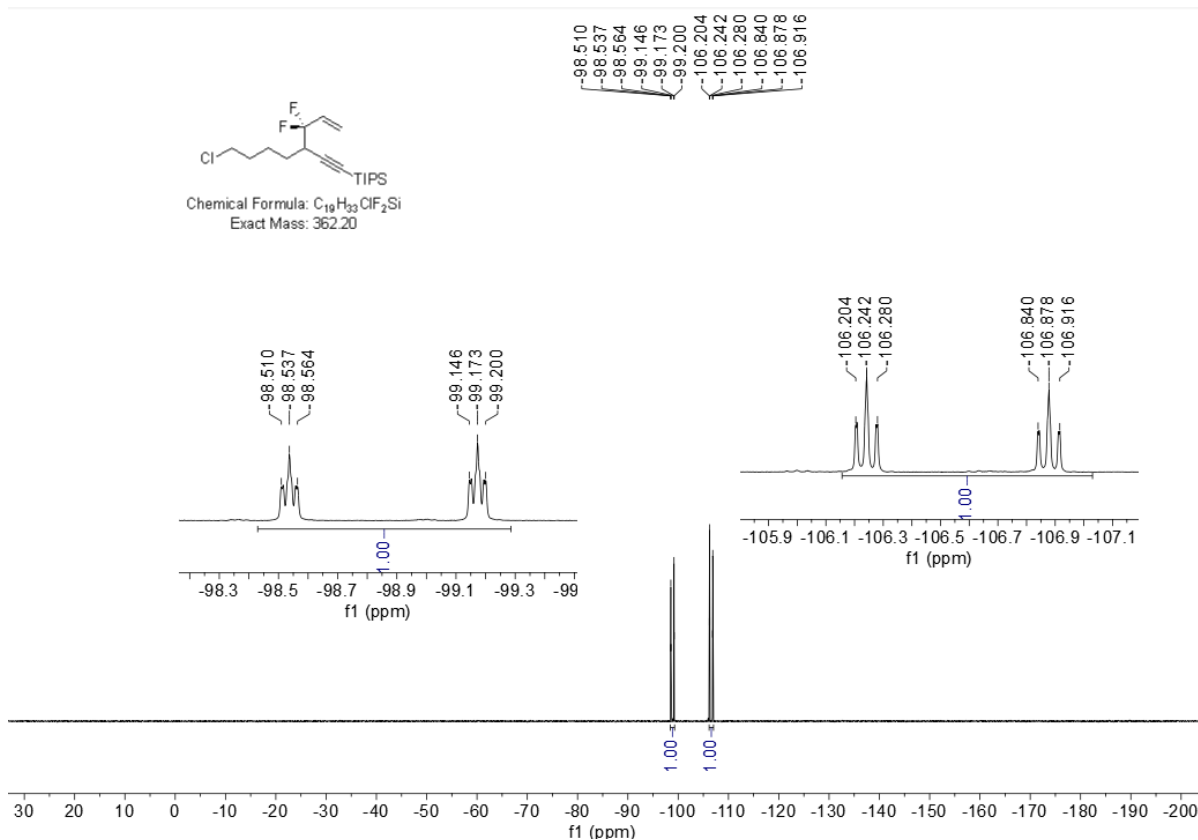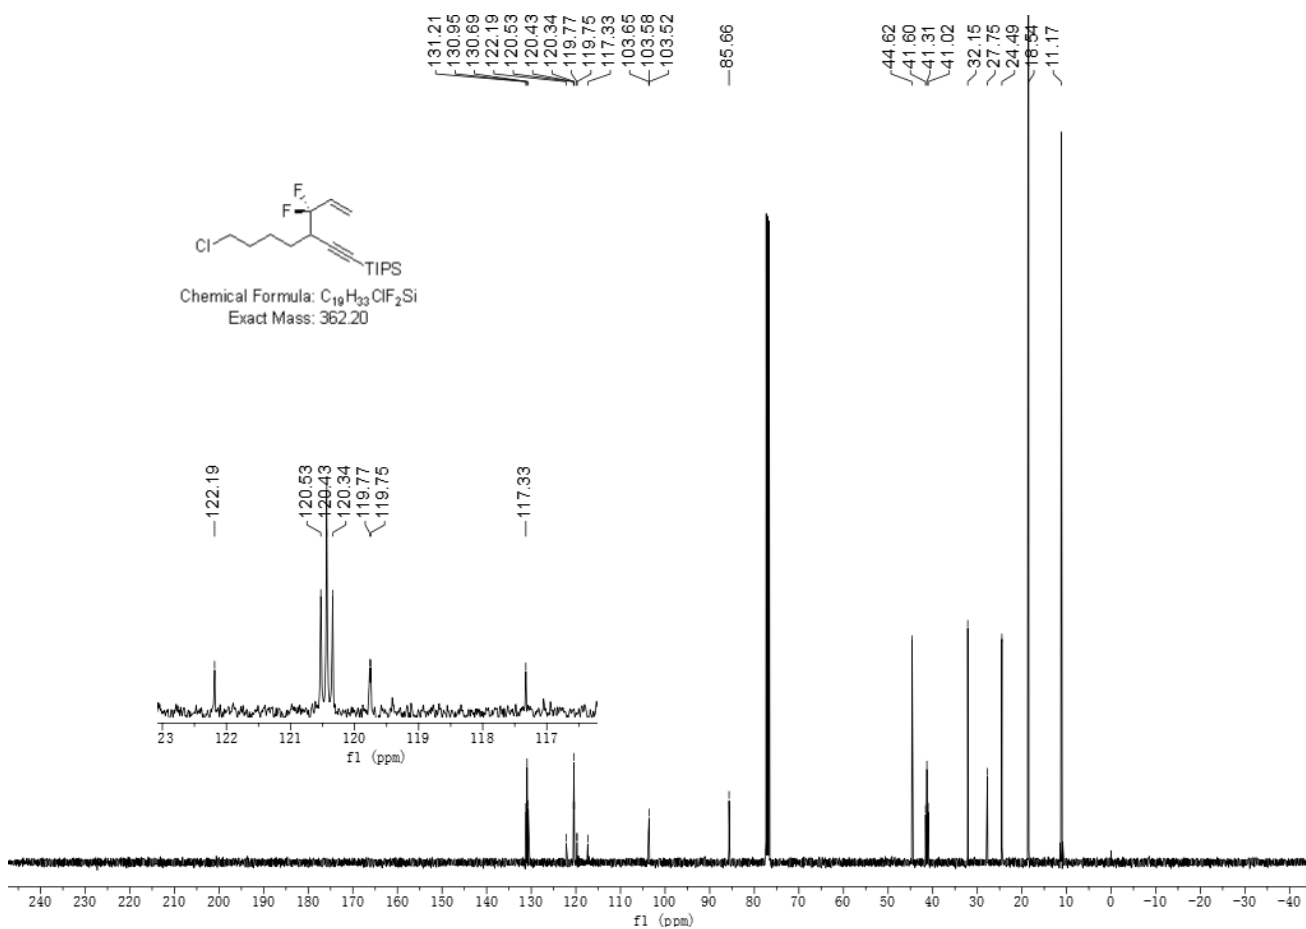

# 6,6-Difluoro-5-((triisopropylsilyl)ethynyl)oct-7-en-1-yl 4-methoxybenzenesulfonate (3o)

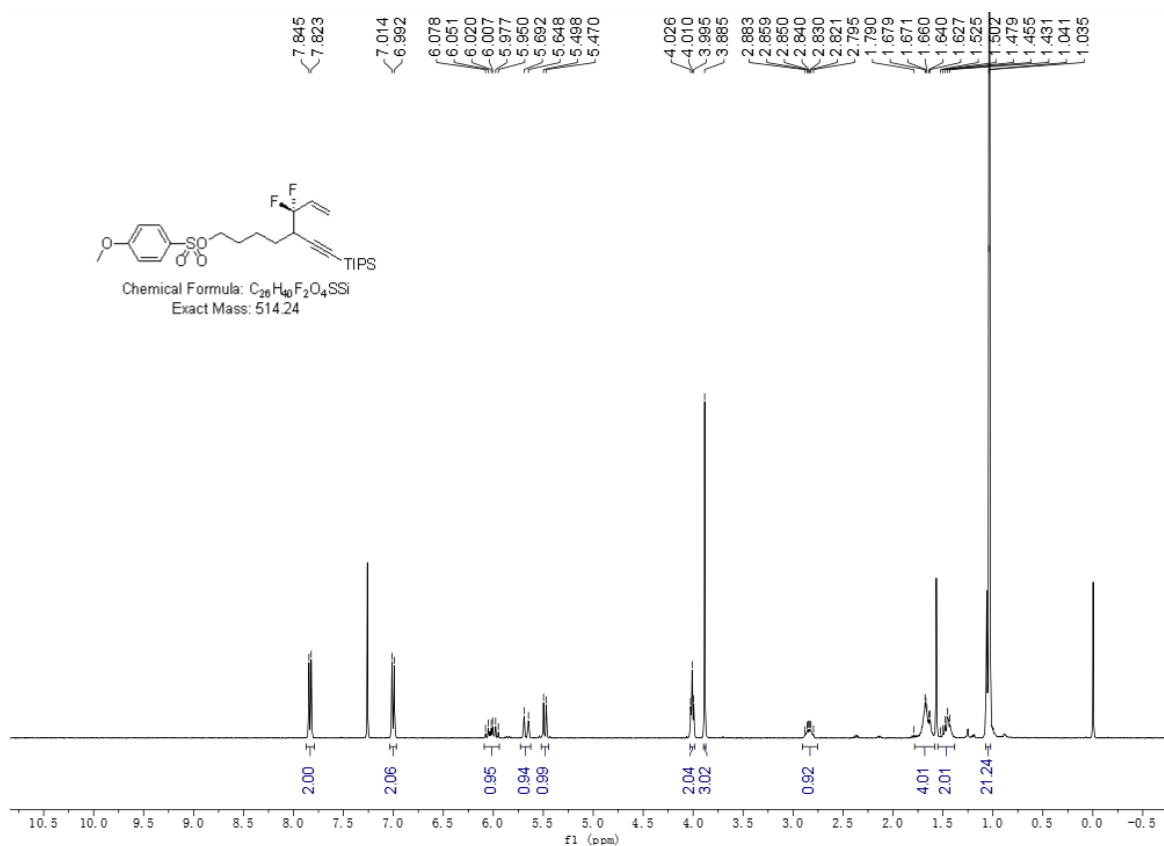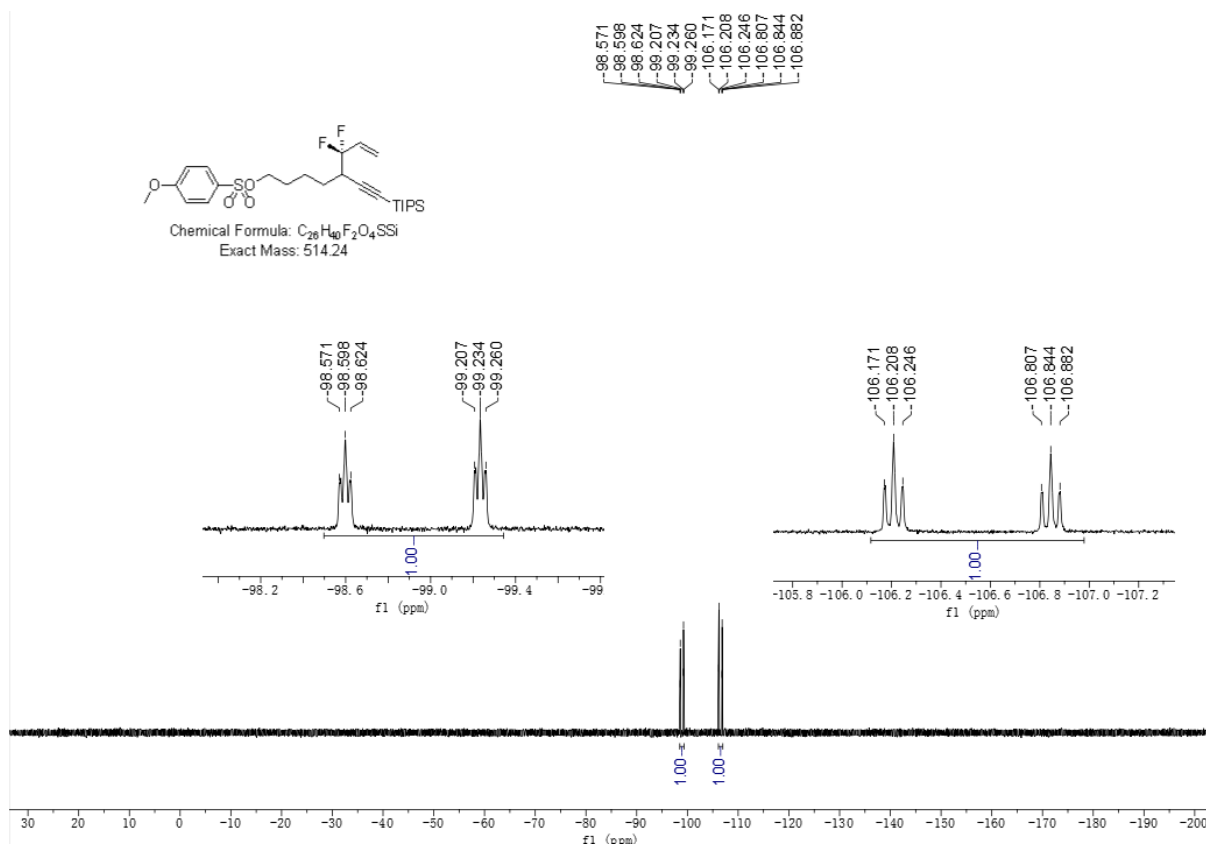

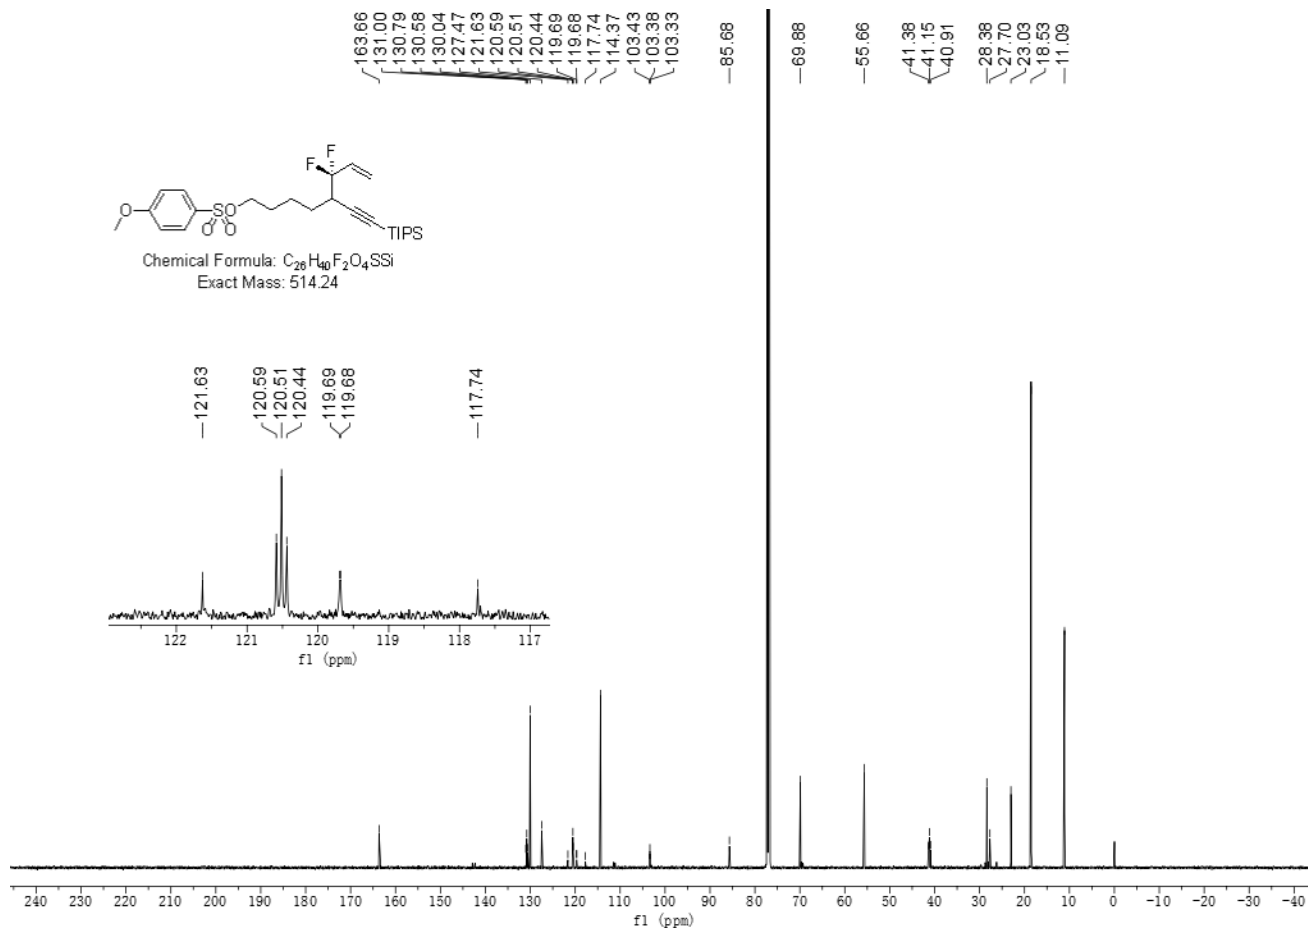

**(4,4-Difluoro-3-(2-(5-methylfuran-2-yl)ethyl)hex-5-en-1-yn-1-yl)triisopropylsilane (3p)**

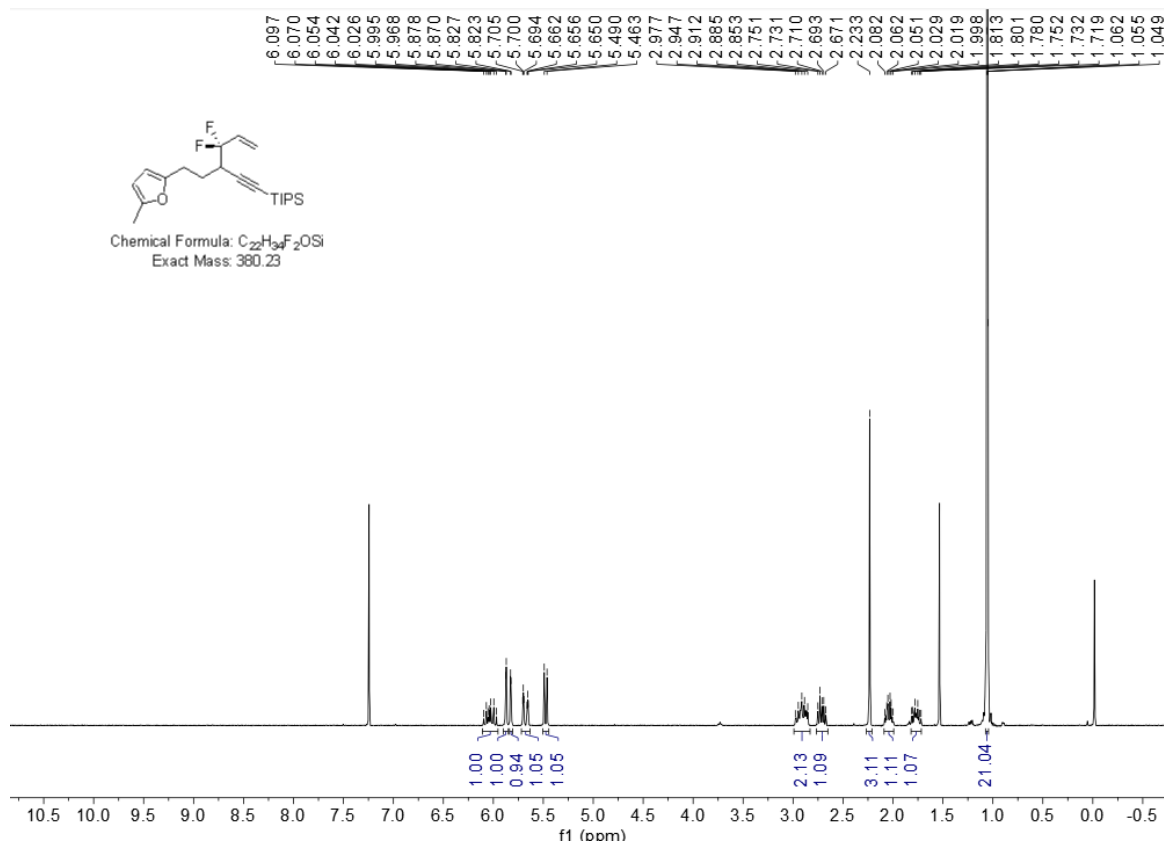

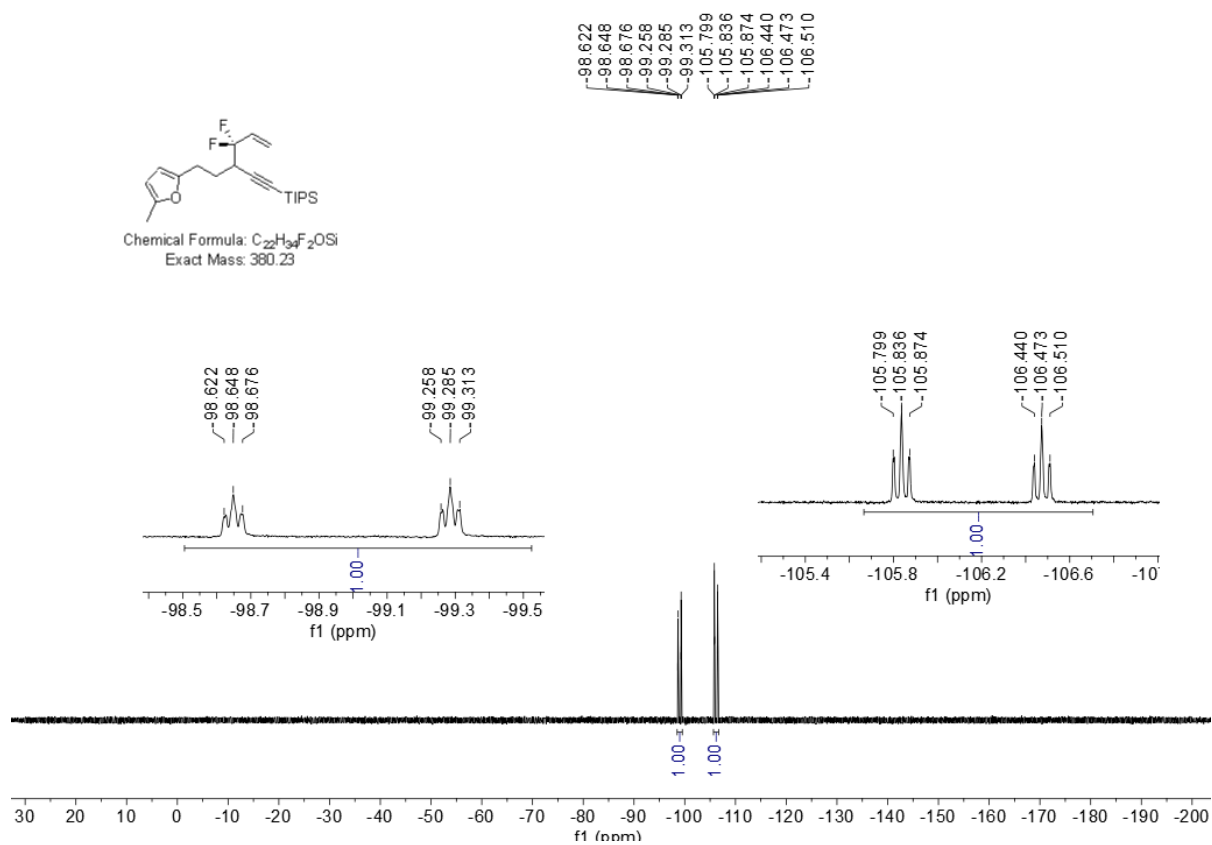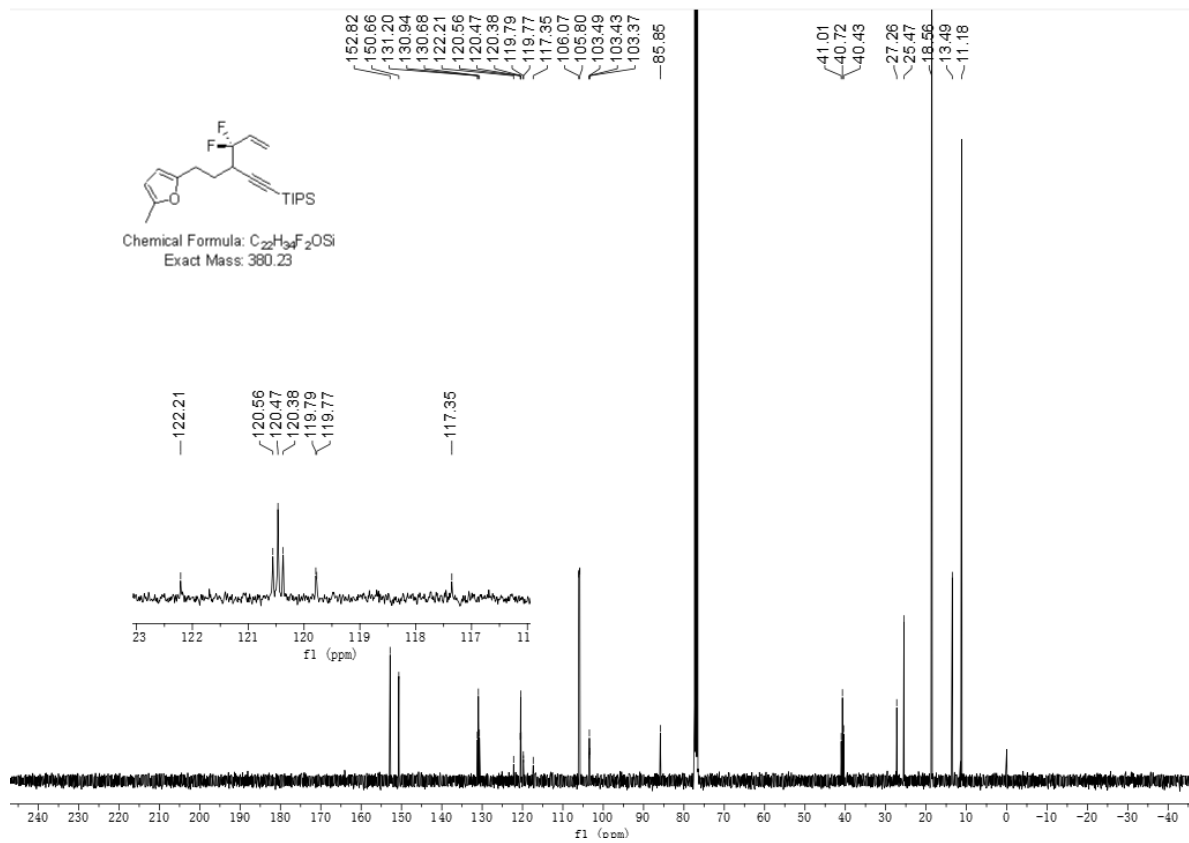





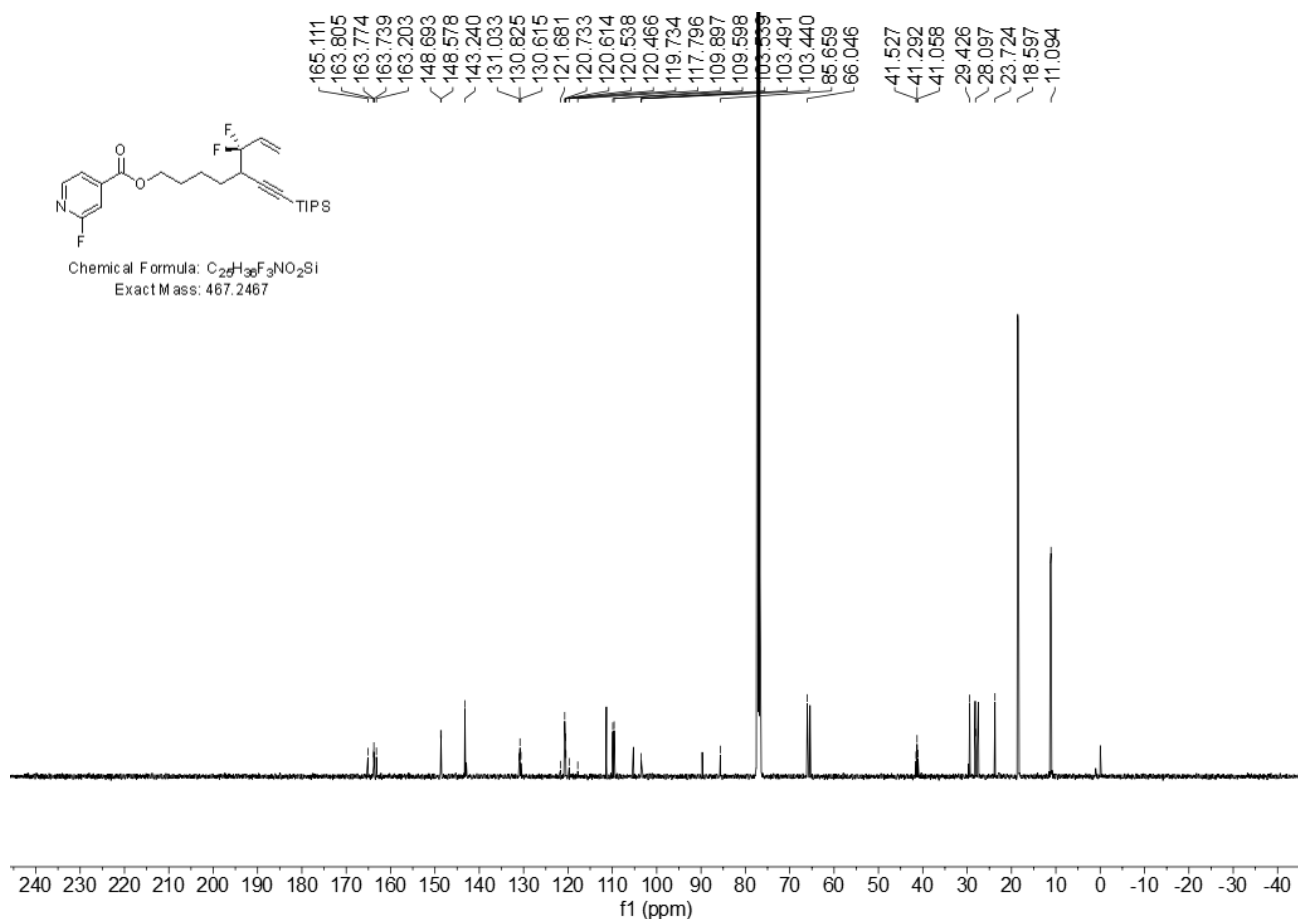

**3,3-Difluoro-8-(((4-methoxyphenyl)peroxy)thio)oxy)-4-((triisopropylsilyl)ethynyl)octane-1,2-diol (5)**

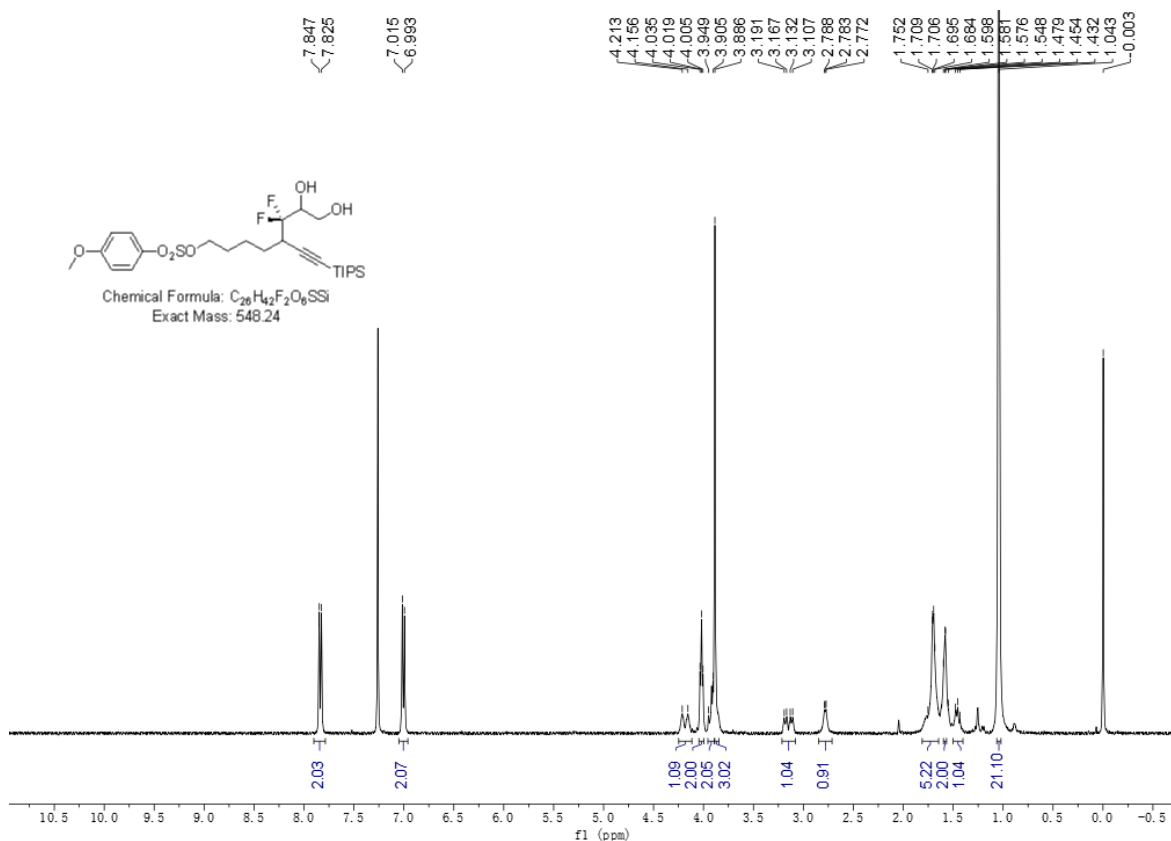

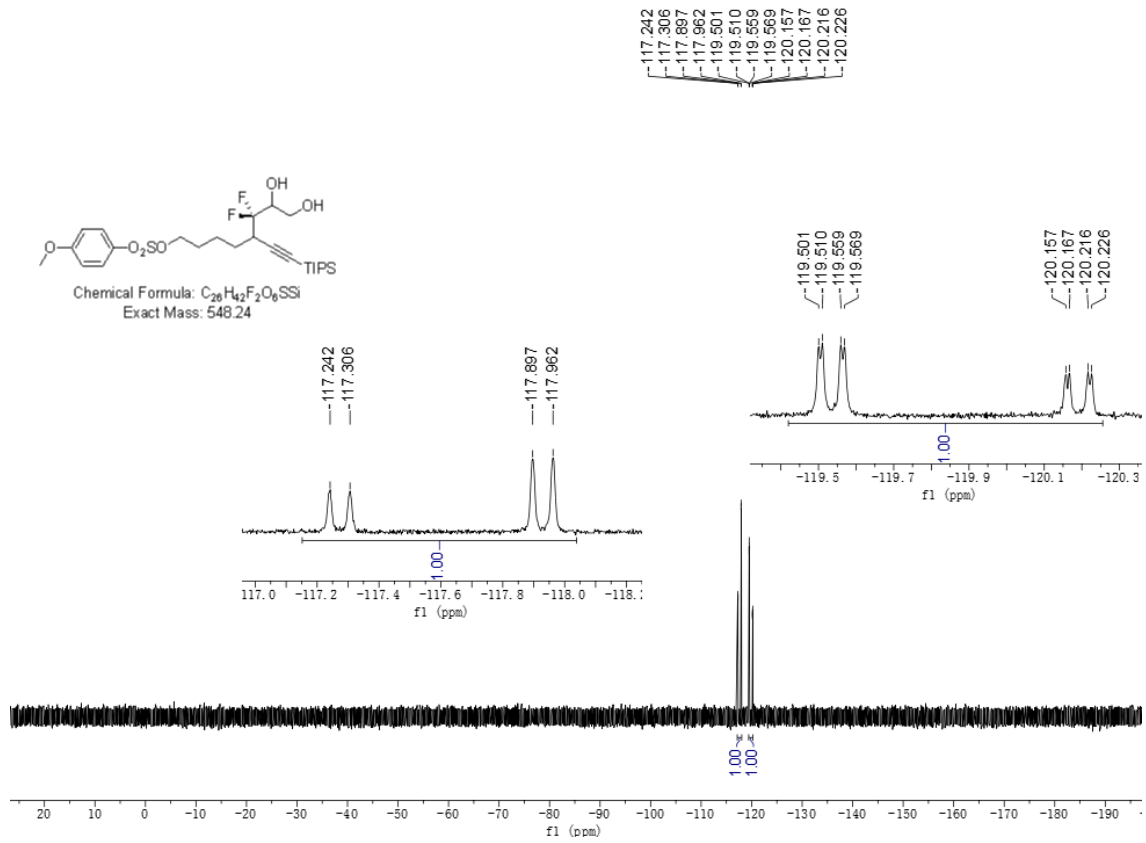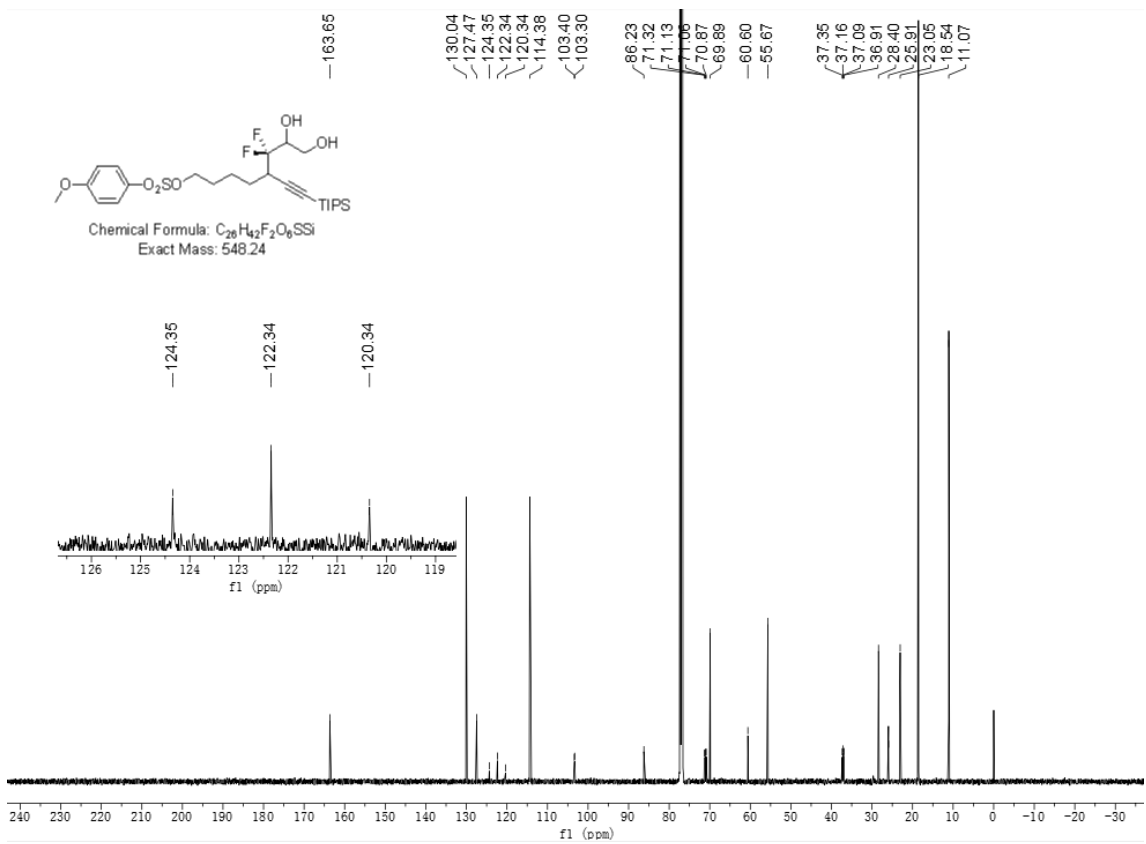

### 3,3-Difluoro-8-(((4-methoxyphenyl)peroxy)thio)oxy)-4-((triisopropylsilyl)ethynyl)octan-1-ol (6)

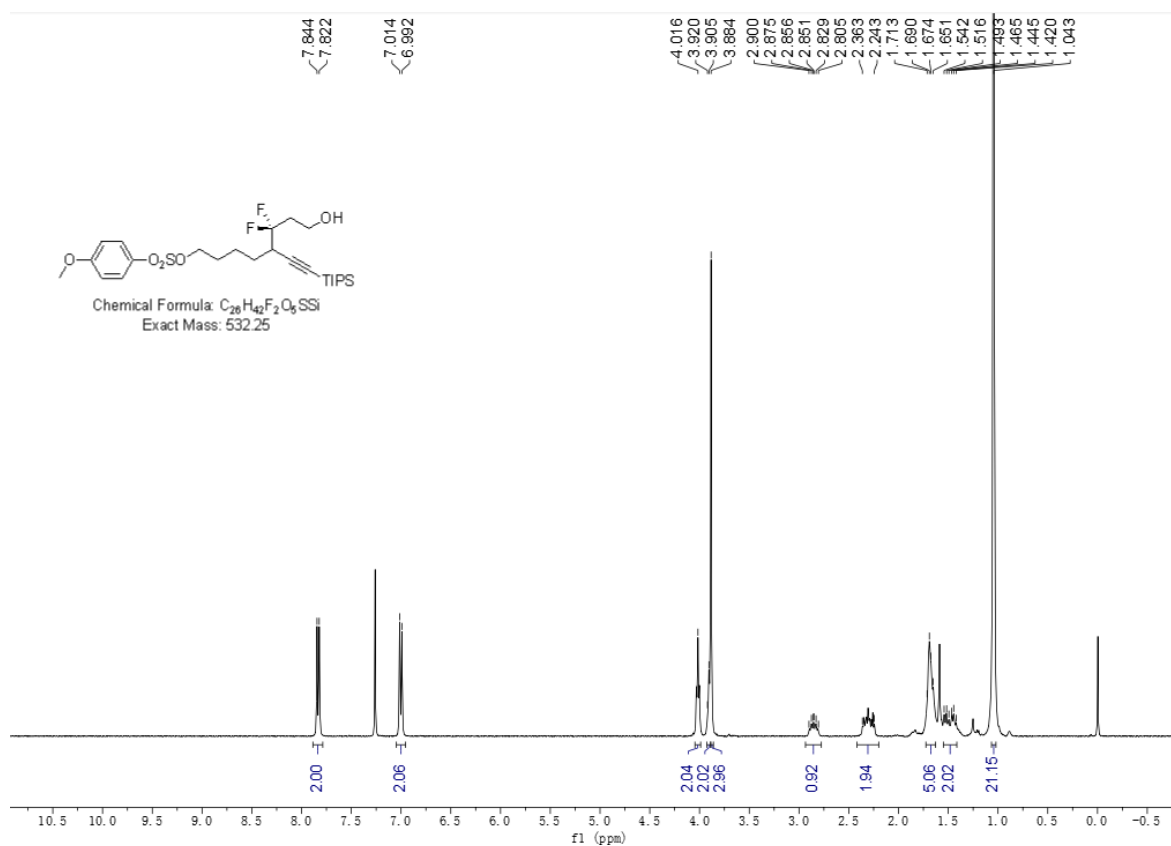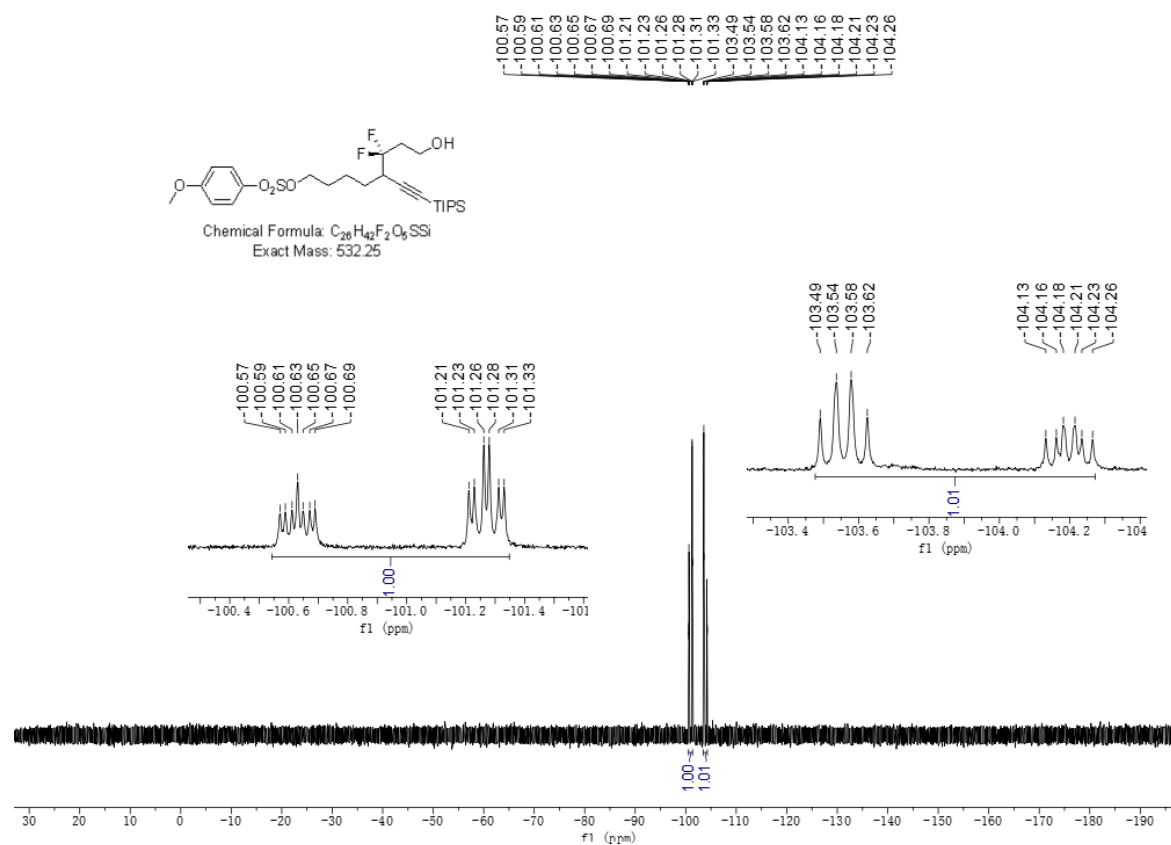

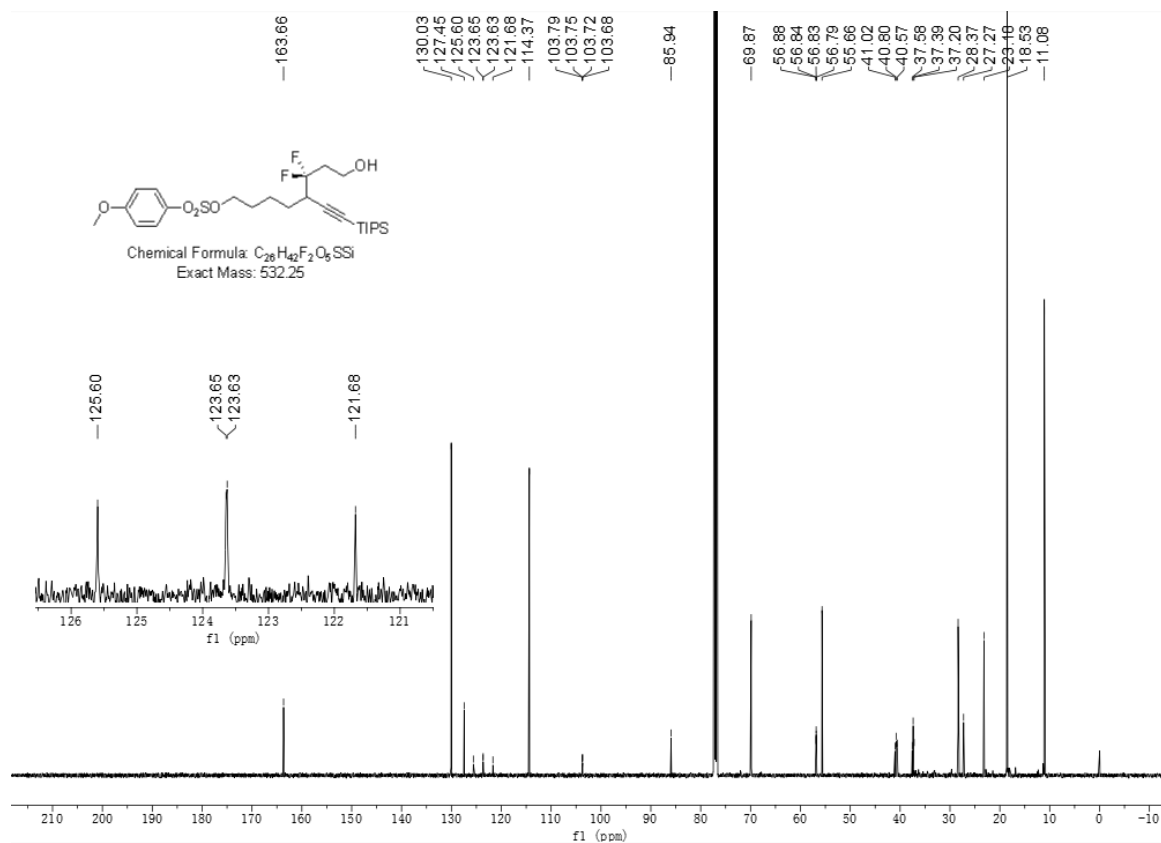

**5-(1-Benzyl-1H-1,2,3-triazol-4-yl)-6,6-difluorooct-7-en-1-yl 4-methoxybenzenesulfonate (8)**

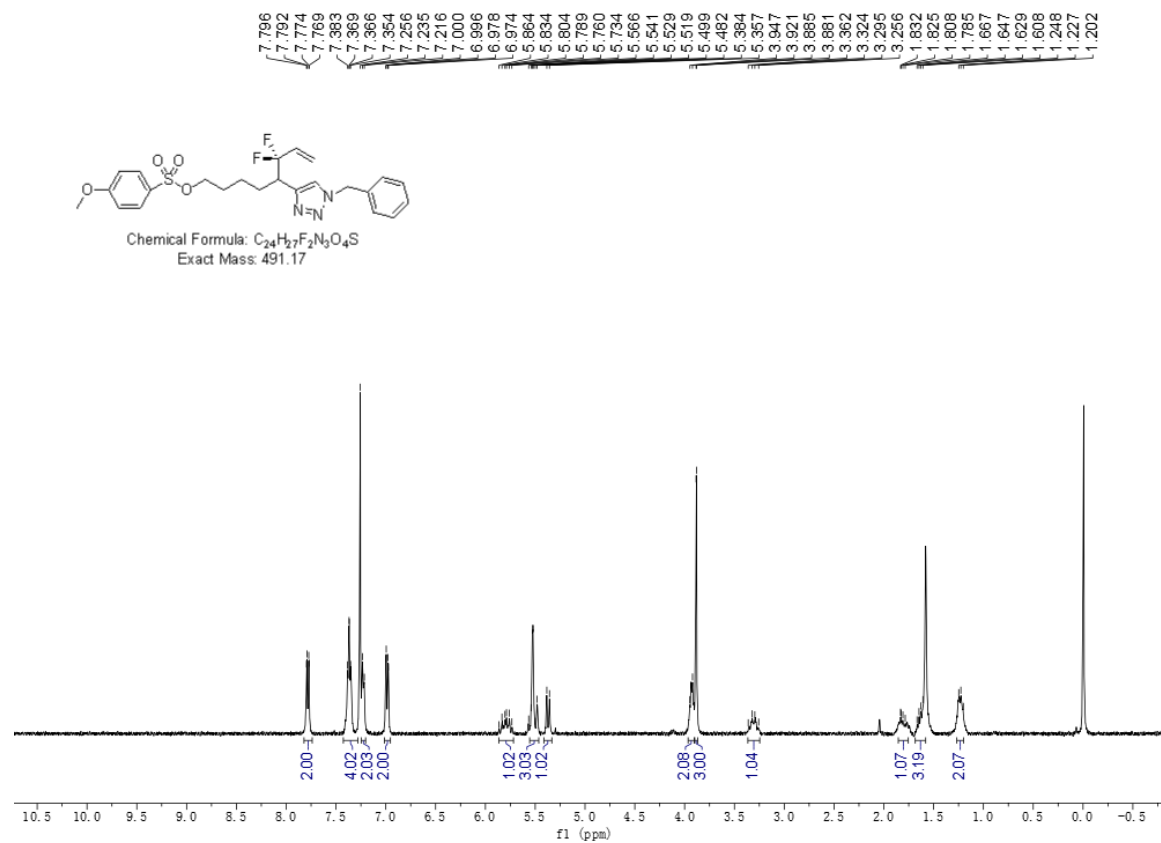

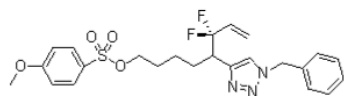

Chemical Formula:  $C_{24}H_{27}F_2N_3O_4S$   
 Exact Mass: 491.17

100.067  
 100.092  
 100.124  
 100.706  
 100.737  
 100.763  
 103.758  
 103.796  
 103.835  
 104.404  
 104.441  
 104.481

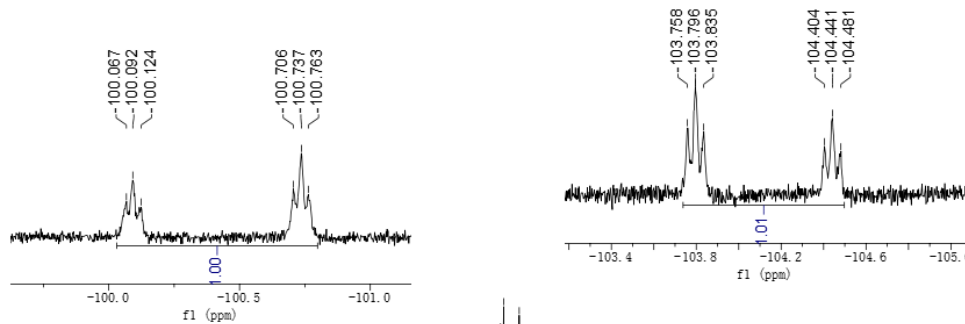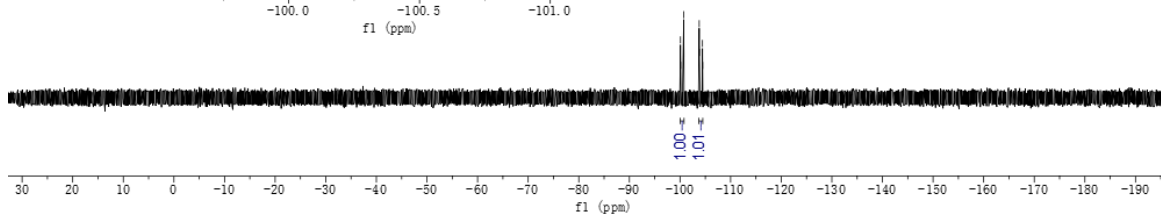

30 20 10 0 -10 -20 -30 -40 -50 -60 -70 -80 -90 -100 -110 -120 -130 -140 -150 -160 -170 -180 -190  
 f1 (ppm)

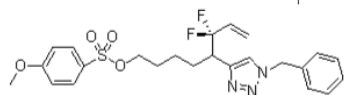

Chemical Formula:  $C_{24}H_{27}F_2N_3O_4S$   
 Exact Mass: 491.17

163.66  
 134.60  
 131.36  
 131.15  
 130.94  
 130.01  
 129.14  
 128.74  
 127.85  
 127.34  
 122.64  
 122.61  
 122.51  
 120.58  
 120.47  
 120.40  
 120.33  
 118.64  
 114.40

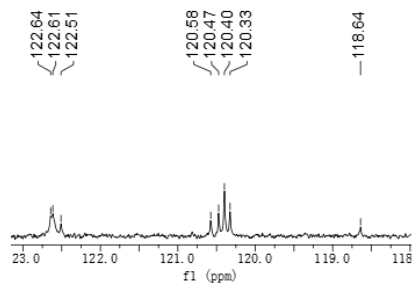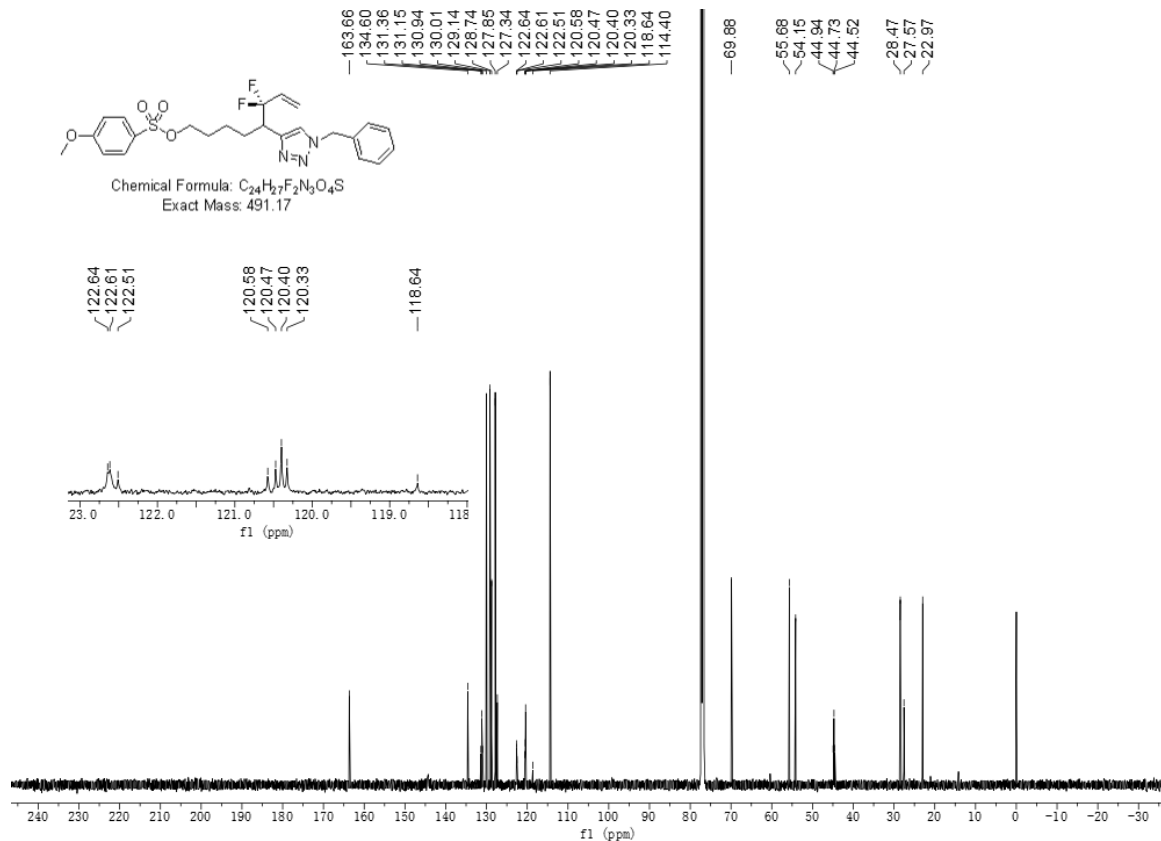

240 230 220 210 200 190 180 170 160 150 140 130 120 110 100 90 80 70 60 50 40 30 20 10 0 -10 -20 -30  
 f1 (ppm)
